# Supplementary material for: Sulfonated nanohydroxyapatite functionalized with 2-aminoethyl dihydrogen phosphate (HAP@AEPH2-SO3H) as a new recyclable and eco-friendly catalyst for rapid one-pot synthesis of 4,4′-(aryl methylene)bis(3-methyl-1H-pyrazol-5-ol)s
Source: Royal Society of Chemistry journal article supplement (doi:10.1039/c5ra16236j), 2015-01-01
Supplement: c5ra16236j1.pdf [file c5ra16236j1.pdf]

## Supplementary Information

### **Sulfonated nanohydroxyapatite functionalized with 2-aminoethyl dihydrogen phosphate (HAP@AEPH<sub>2</sub>-SO<sub>3</sub>H) as a new recyclable and eco-friendly catalyst for rapid one-pot synthesis of 4,4'-(aryl methylene)bis(3-methyl-1H-pyrazol-5-ol)s**

Monireh Zarghani, Batool Akhlaghinia\*

*Department of Chemistry, Faculty of Sciences, Ferdowsi University of Mashhad, Mashhad 9177948974, Iran.*

#### **Experimental**

##### *General*

The purity determinations of the products were accomplished by TLC on silica gel polygram STL G/UV 254 plates. The melting points of products were determined with an Electrothermal Type 9100 melting point apparatus. The FTIR spectra were recorded on pressed KBr pellets using a AVATAR 370 FT-IR spectrometer (Therma Nicolet spectrometer, USA) at room temperature in the range between 4000 and 400 cm<sup>-1</sup> with a resolution of 4 cm<sup>-1</sup>, and each spectrum was the average of 32 scans. NMR spectra were recorded on a NMR Bruker Avance spectrometer at 400 and 300 MHz in DMSO-d<sub>6</sub> as solvent in the presence of tetramethylsilane as internal standard. Mass spectra were recorded with a CH7A Varianmat Bremem instrument at 70

eV electron impact ionization; in  $m/z$  (rel %). All of the products were known compounds and characterized by the FT-IR and comparison of their melting points with known compounds. The structure of selected products was further confirmed by  $^1\text{H}$ NMR,  $^{13}\text{C}$ NMR spectroscopy, mass spectrometry and elemental analysis.

4,4'-(Phenylmethylene)bis(3-methyl-1-phenyl-1H-pyrazol-5-ol)(3a)

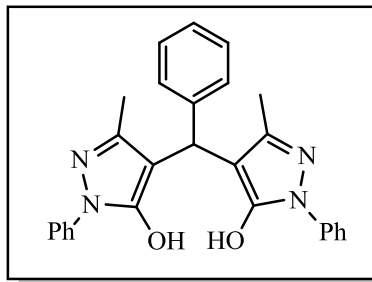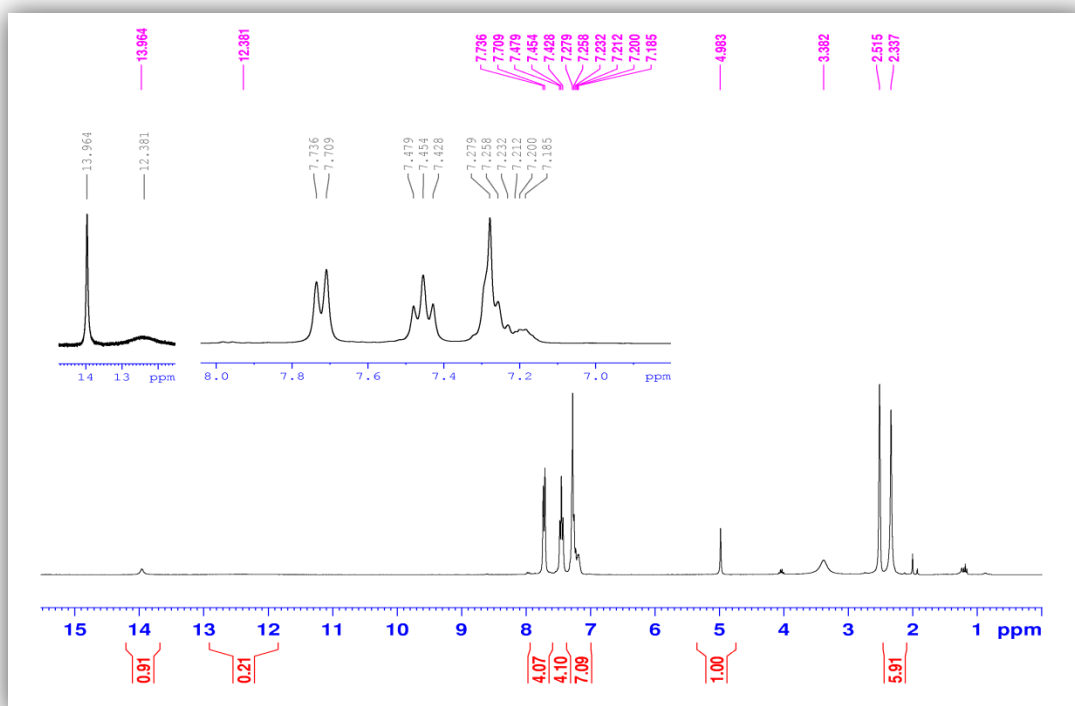

**Figure 1a:**  $^1\text{H}$  NMR (300 MHz,  $\text{DMSO}-d_6$ ) of 4,4'-(Phenylmethylene)bis(3-methyl-1-phenyl-1H-pyrazol-5-ol)

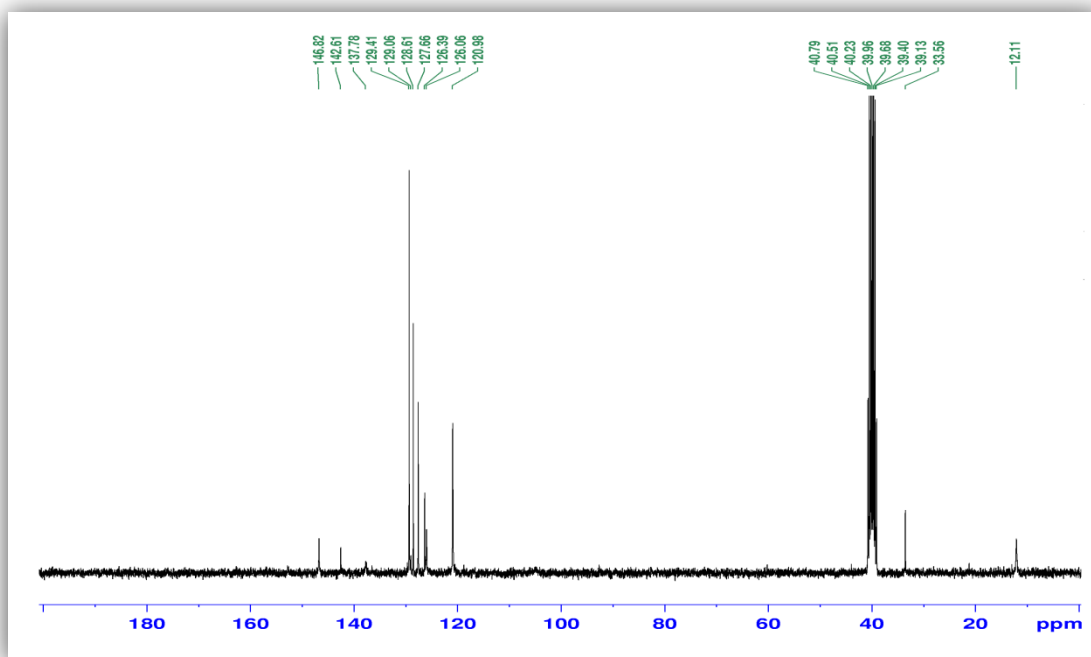

**Figure 1b:**  $^{13}\text{C}$  NMR (75 MHz,  $\text{DMSO-}d_6$ ) of 4,4'-(Phenylmethylene)bis(3-methyl-1-phenyl-1*H*-pyrazol-5-ol)

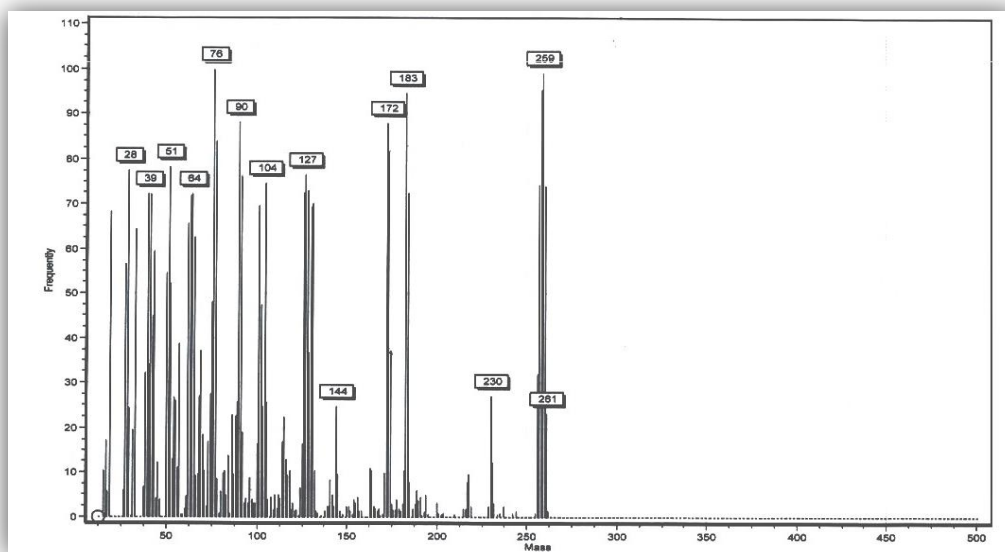

**Figure 1c:** Mass spectrum of 4,4'-(Phenylmethylene)bis(3-methyl-1-phenyl-1*H*-pyrazol-5-ol).

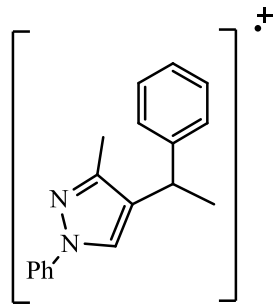

259

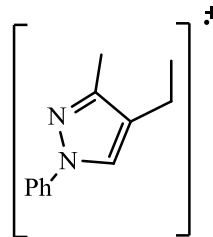

183

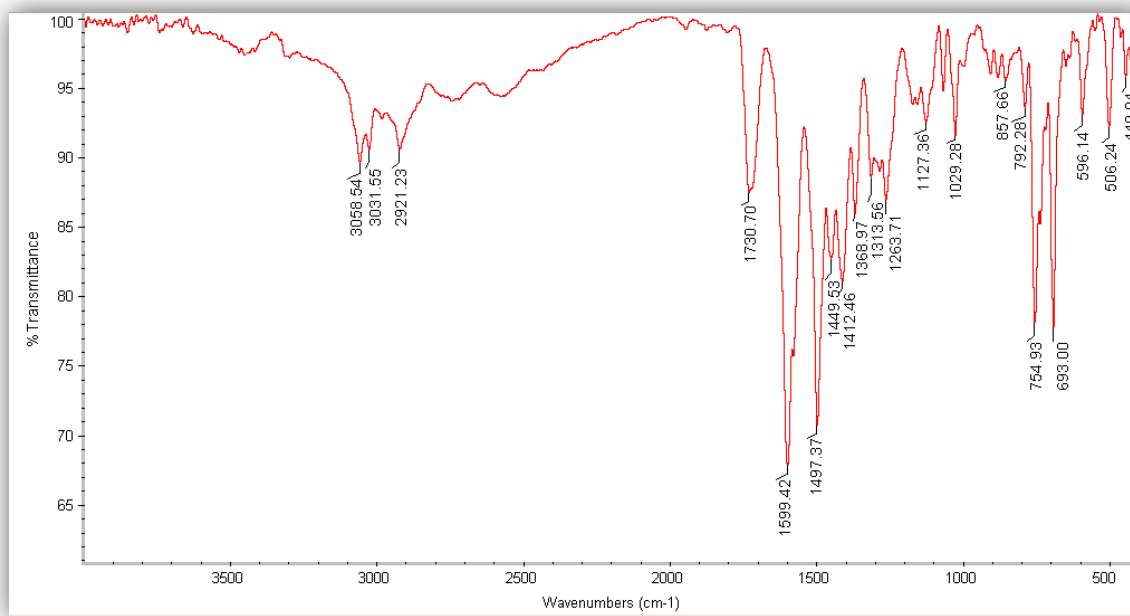

**Figure 1d:** FT-IR (KBr) spectrum of 4,4'-(Phenylmethylene)bis(3-methyl-1-phenyl-1H-pyrazol-5-ol).

4,4'-((4-Hydroxyphenyl)methylene)bis(3-methyl-1-phenyl-1H-pyrazol-5-ol) (3b)

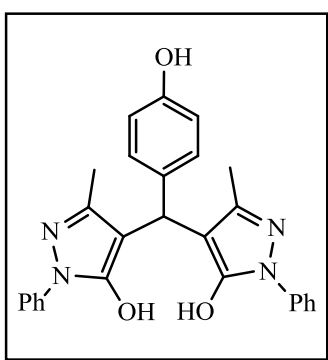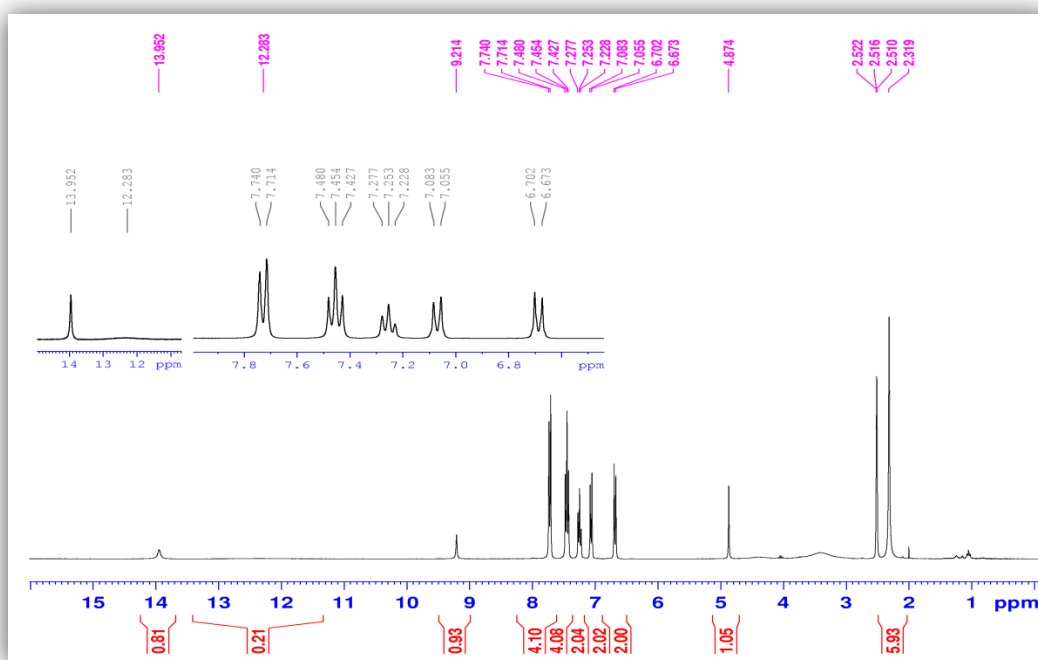

**Figure 2a:**  $^1\text{H}$  NMR (300 MHz,  $\text{DMSO-}d_6$ ) of 4,4'-((4-Hydroxyphenyl)methylene)bis(3-methyl-1-phenyl-1*H*-pyrazol-5-ol)

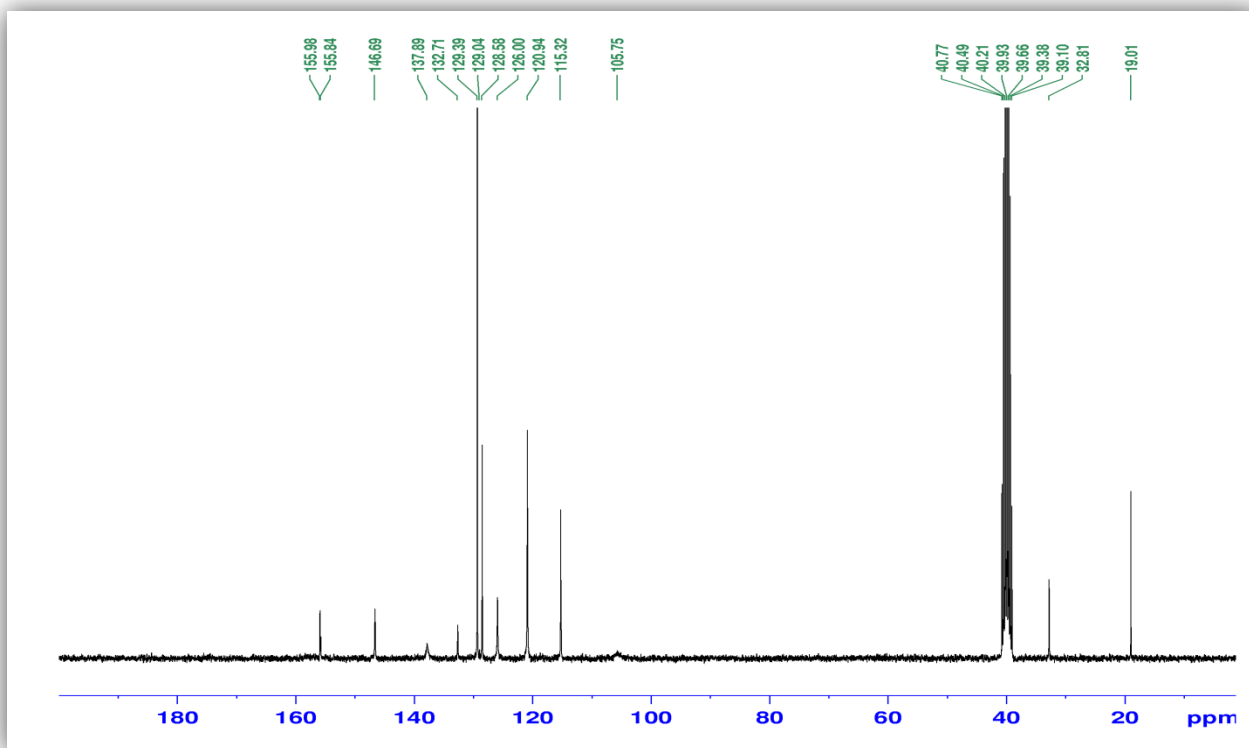

**Figure 2b:**  $^{13}\text{C}$  NMR (75 MHz,  $\text{DMSO-}d_6$ ) of 4,4'-((4-Hydroxyphenyl)methylene)bis(3-methyl-1-phenyl-1*H*-pyrazol-5-ol)

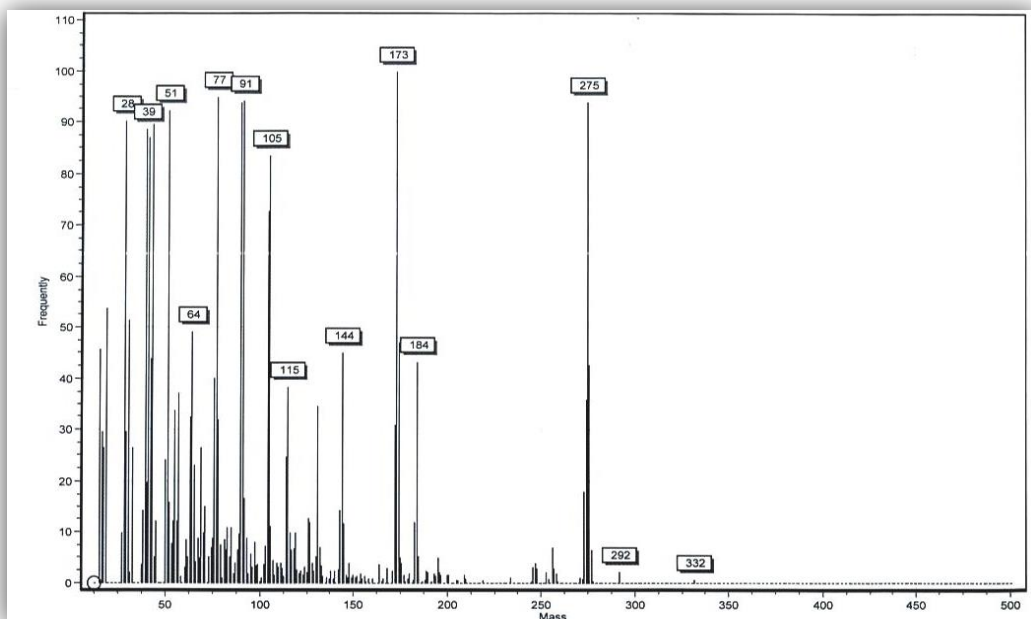

**Figure 2c:** Mass spectrum of 4,4'-((4-Hydroxyphenyl)methylene)bis(3-methyl-1-phenyl-1*H*-pyrazol-5-ol)

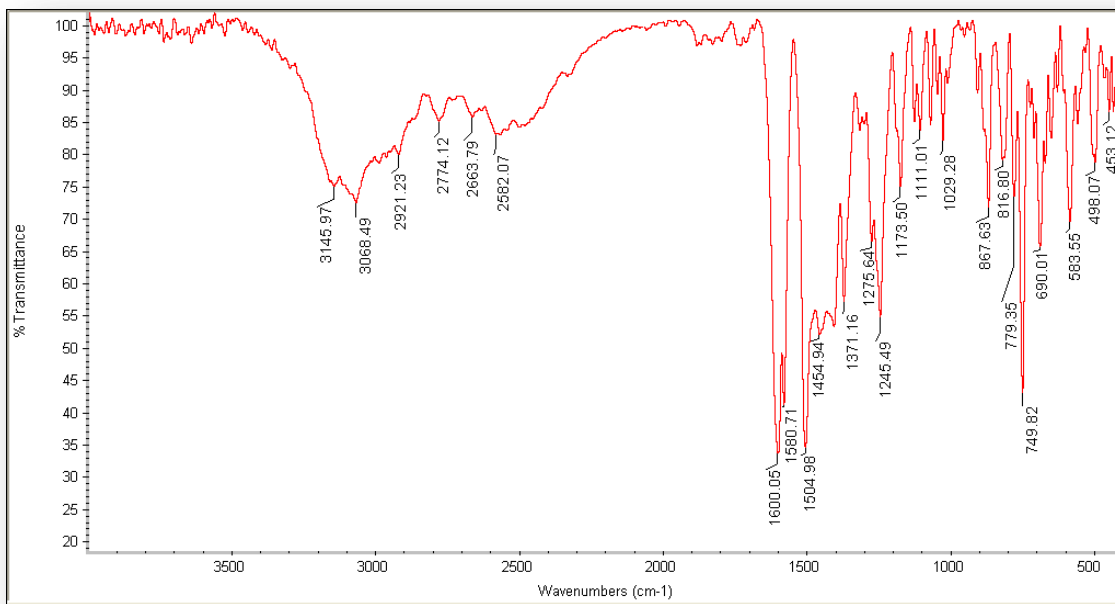

**Figure 2d:** FT-IR (KBr) spectrum of 4,4'-((4-Hydroxyphenyl)methylene)bis(3-methyl-1-phenyl-1*H*-pyrazol-5-ol).



4,4'-((3-Hydroxyphenyl)methylene)bis(3-methyl-1-phenyl-1H-pyrazol-5-ol) (3c)

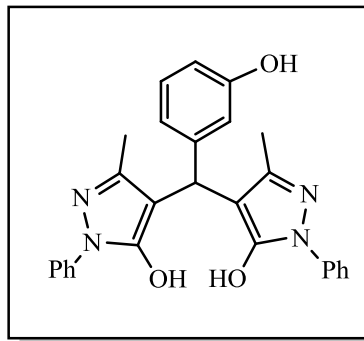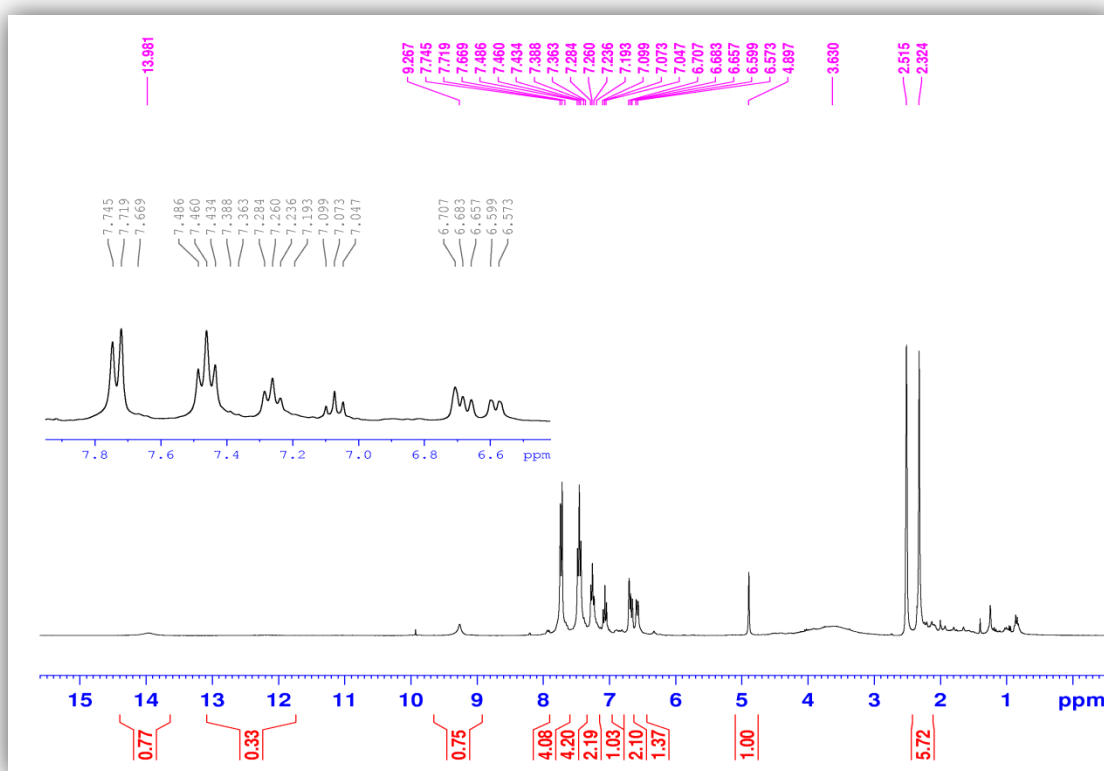

Figure 3a:  $^1\text{H}$  NMR (300 MHz,  $\text{DMSO-}d_6$ ) of 4,4'-((3-Hydroxyphenyl)methylene)bis(3-methyl-1-phenyl-1H-pyrazol-5-ol)

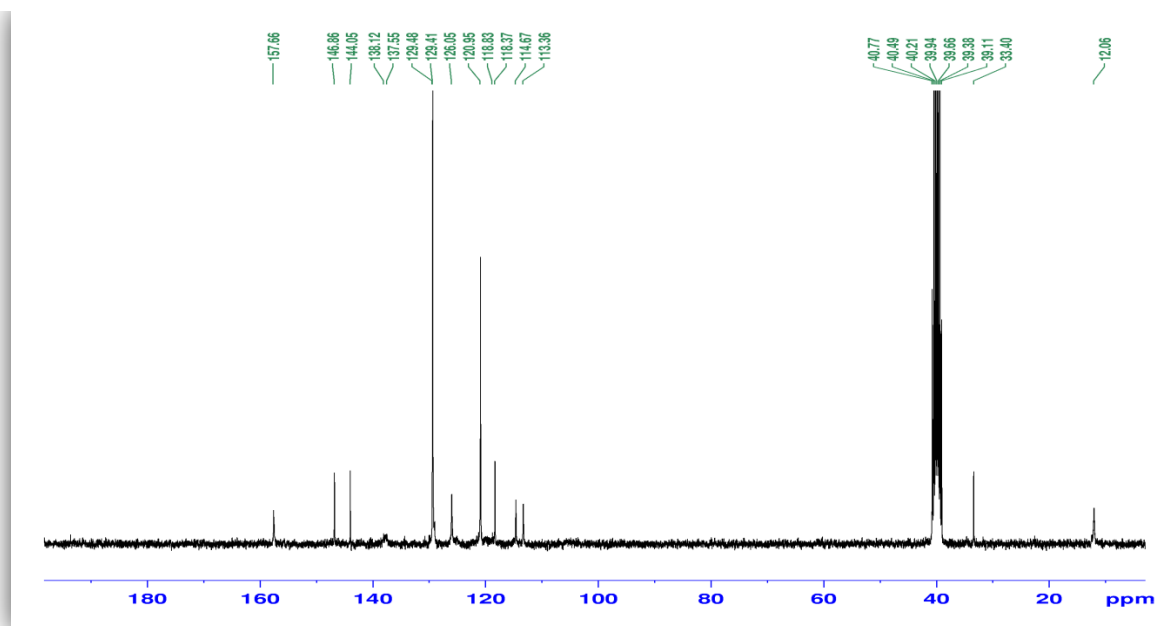

**Figure 3b:**  $^{13}\text{C}$  NMR (75 MHz,  $\text{DMSO}-d_6$ ) of 4,4'-((3-Hydroxyphenyl)methylene)bis(3-methyl-1-phenyl-1H-pyrazol-5-ol)

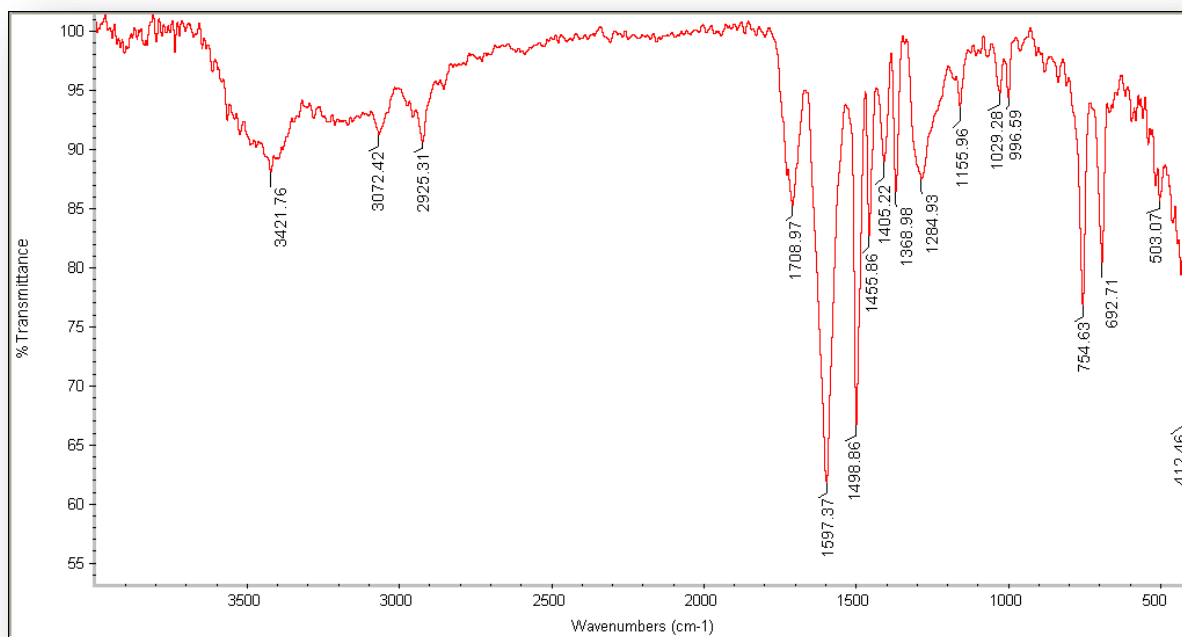

**Figure 3c:** FT-IR (KBr) spectrum of 4,4'-((3-Hydroxyphenyl)methylene)bis(3-methyl-1-phenyl-1H-pyrazol-5-ol).

4,4'-((2-Hydroxyphenyl)methylene)bis(3-methyl-1-phenyl-1H-pyrazol-5-ol) (3d)

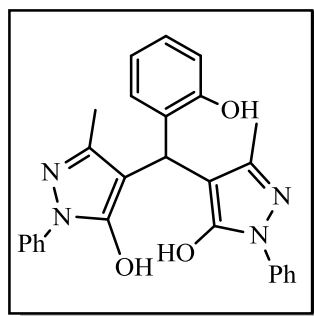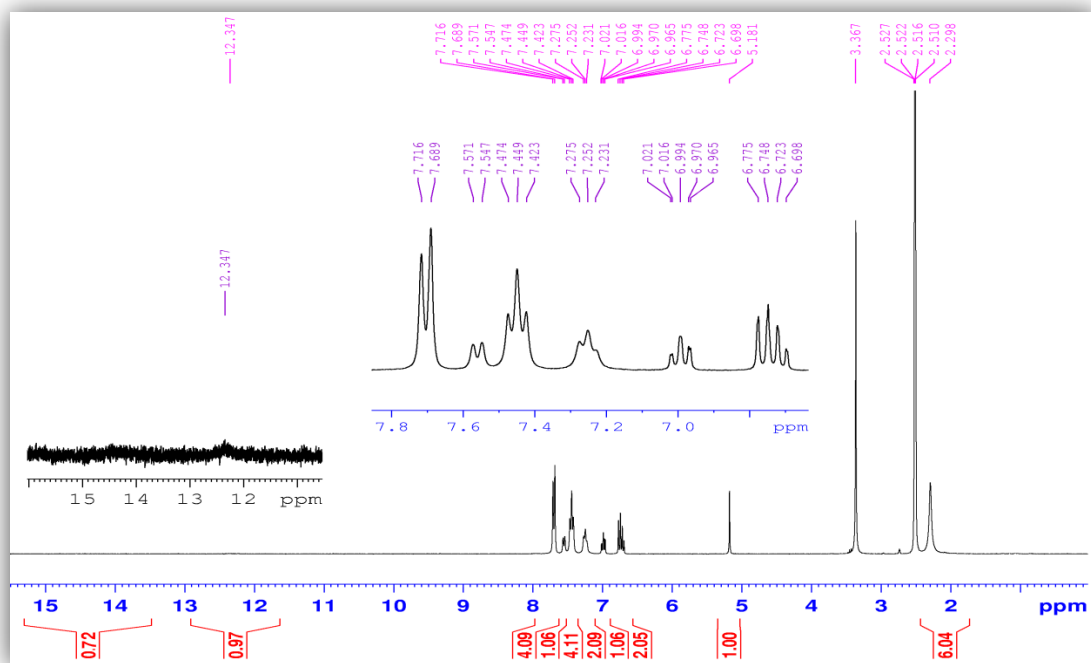

Figure 4a:  $^1\text{H}$  NMR (300 MHz,  $\text{DMSO-}d_6$ ) of 4,4'-((2-Hydroxyphenyl)methylene)bis(3-methyl-1-phenyl-1H-pyrazol-5-ol)

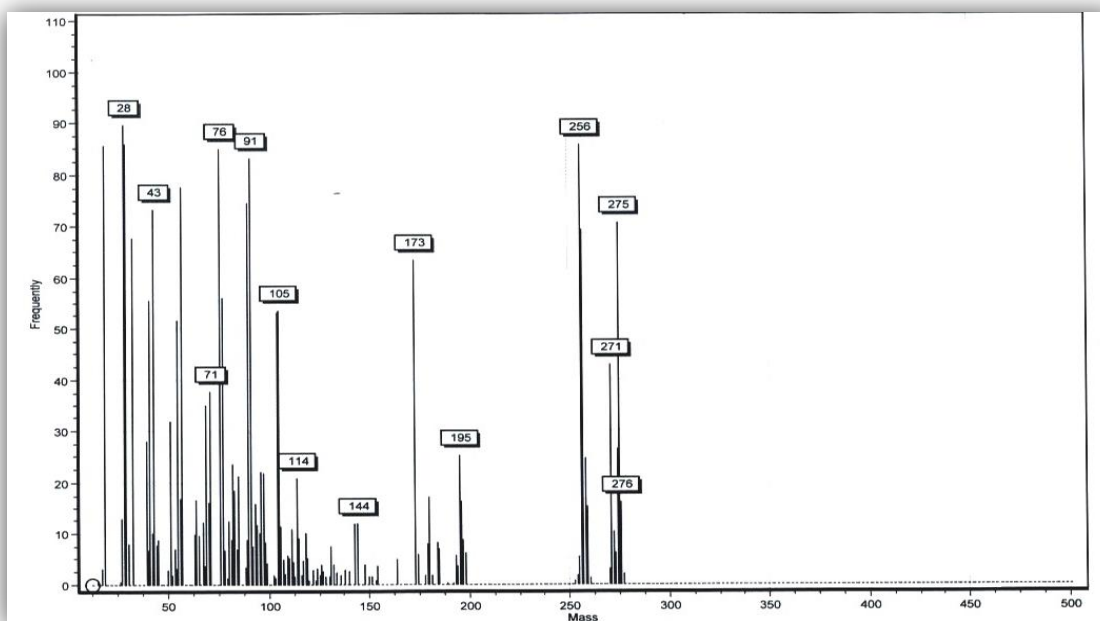

**Figure 4b:** Mass spectrum of 4,4'-((2-Hydroxyphenyl)methylene)bis(3-methyl-1-phenyl-1*H*-pyrazol-5-ol).

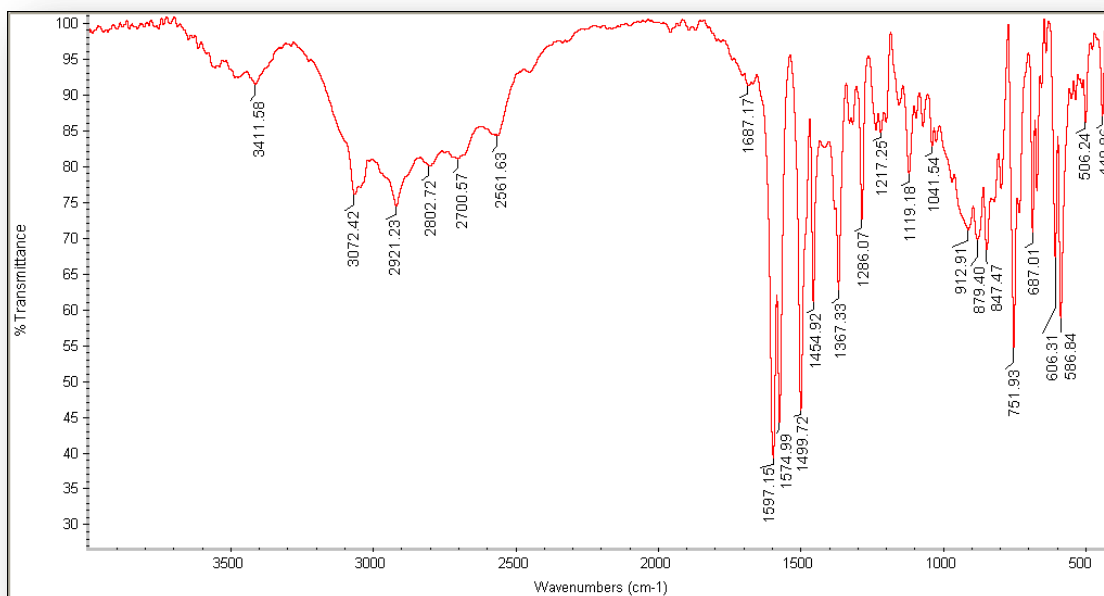

**Figure 4c:** FT-IR (KBr) spectrum of 4,4'-((2-Hydroxyphenyl)methylene)bis(3-methyl-1-phenyl-1*H*-pyrazol-5-ol).

4,4'-((4-Methoxyphenyl)methylene)bis(3-methyl-1-phenyl-1H-pyrazol-5-ol) (3e)

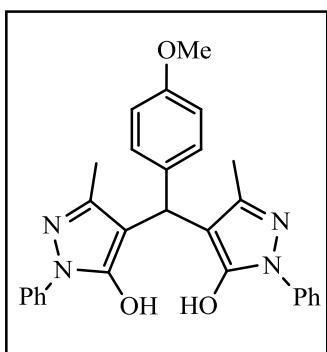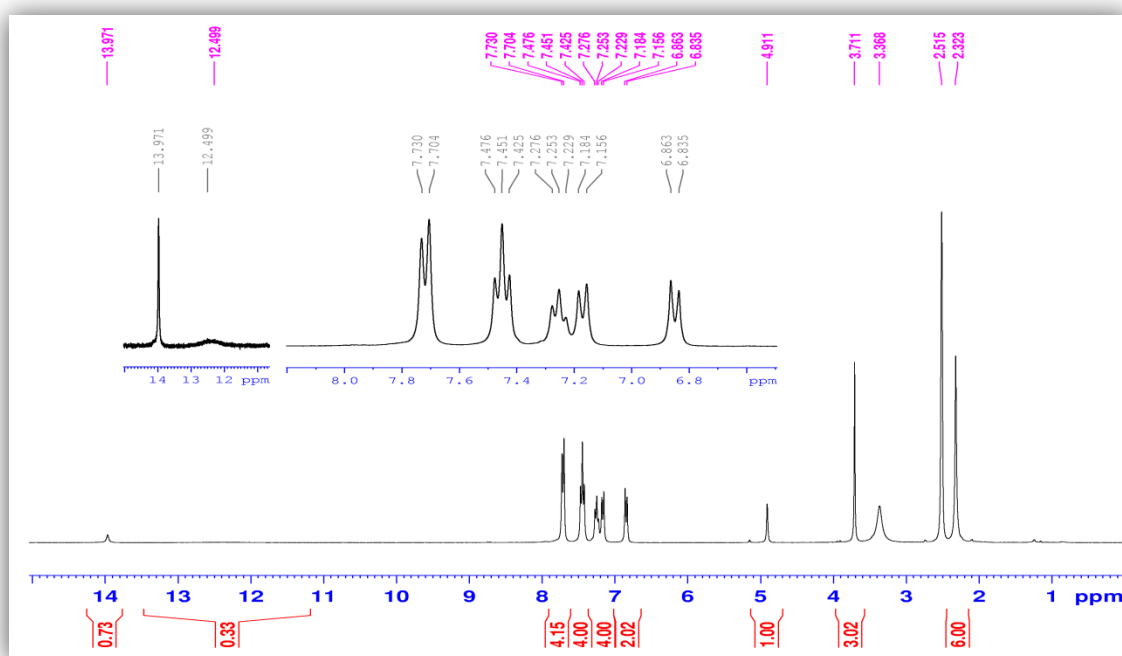

**Figure 5a:**  $^1\text{H}$  NMR (300 MHz,  $\text{DMSO-}d_6$ ) of 4,4'-((4-Methoxyphenyl)methylene)bis(3-methyl-1-phenyl-1H-pyrazol-5-ol)

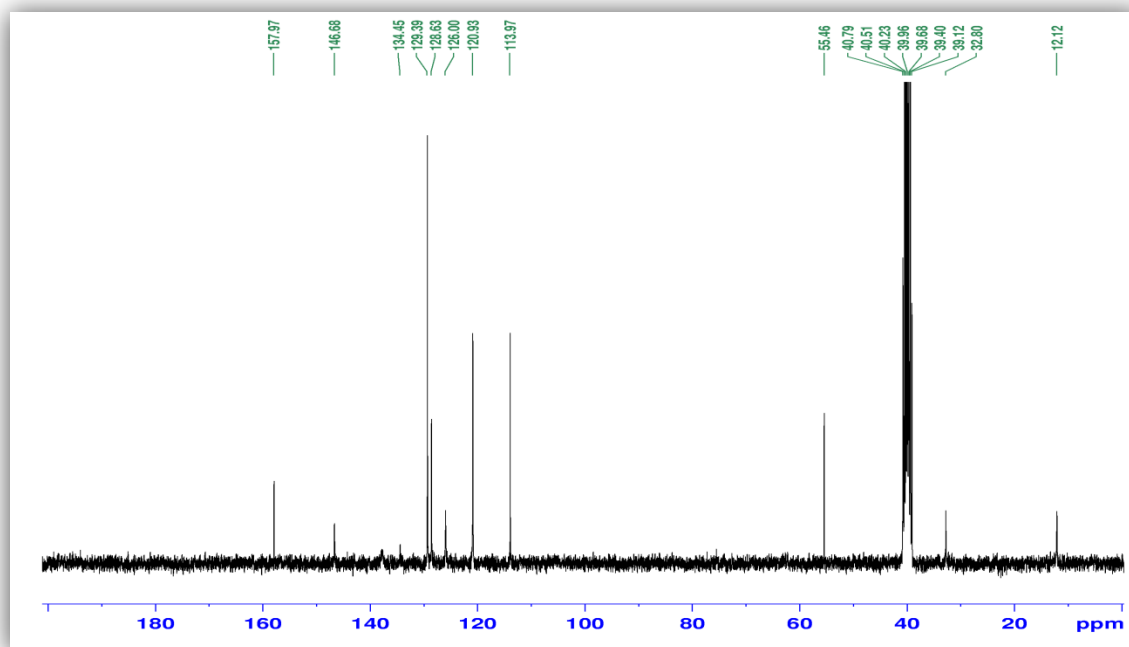

**Figure 5b:**  $^{13}\text{C}$  NMR (75 MHz,  $\text{DMSO-}d_6$ ) of 4,4'-((4-Methoxyphenyl)methylene)bis(3-methyl-1-phenyl-1*H*-pyrazol-5-ol)

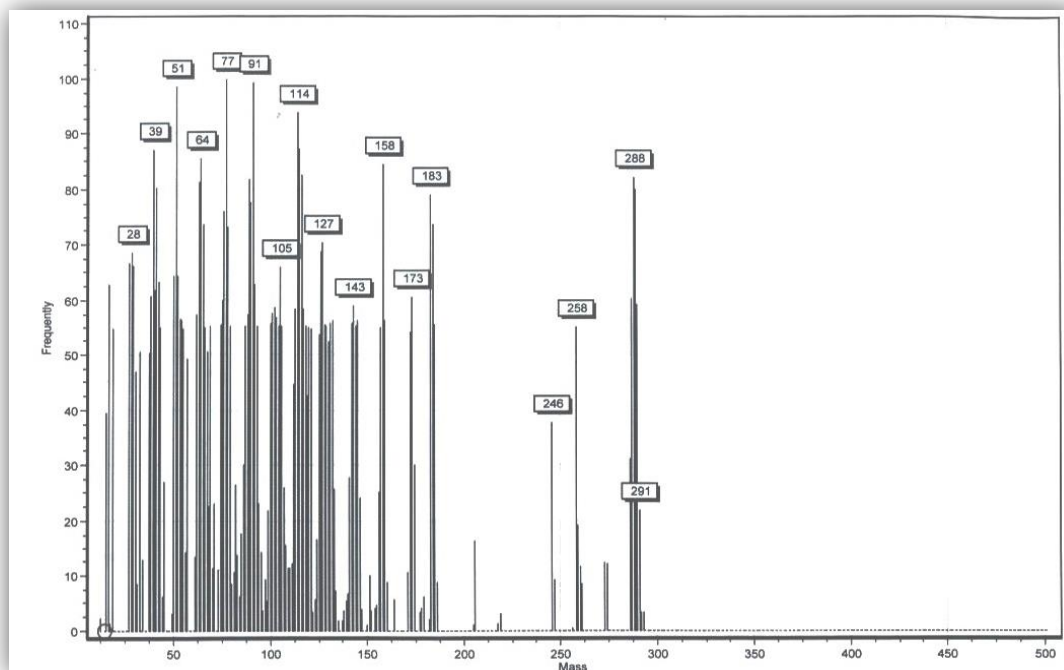

**Figure 5c:** Mass spectrum of 4,4'-((4-Methoxyphenyl)methylene)bis(3-methyl-1-phenyl-1*H*-pyrazol-5-ol).

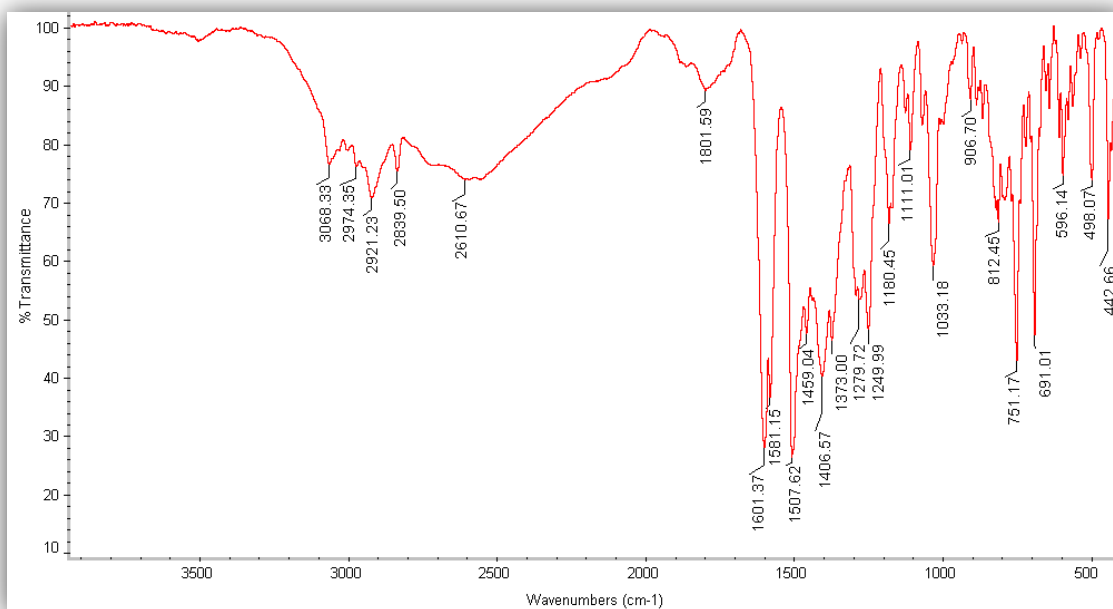

**Figure 5d:** FT-IR (KBr) spectrum of 4,4'-((4-Methoxyphenyl)methylene)bis(3-methyl-1-phenyl-1H-pyrazol-5-ol))

4,4'-((3-Methoxyphenyl)methylene)bis(3-methyl-1-phenyl-1H-pyrazol-5-ol) (3f)

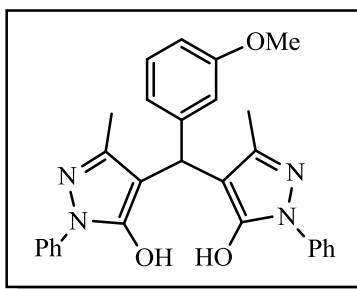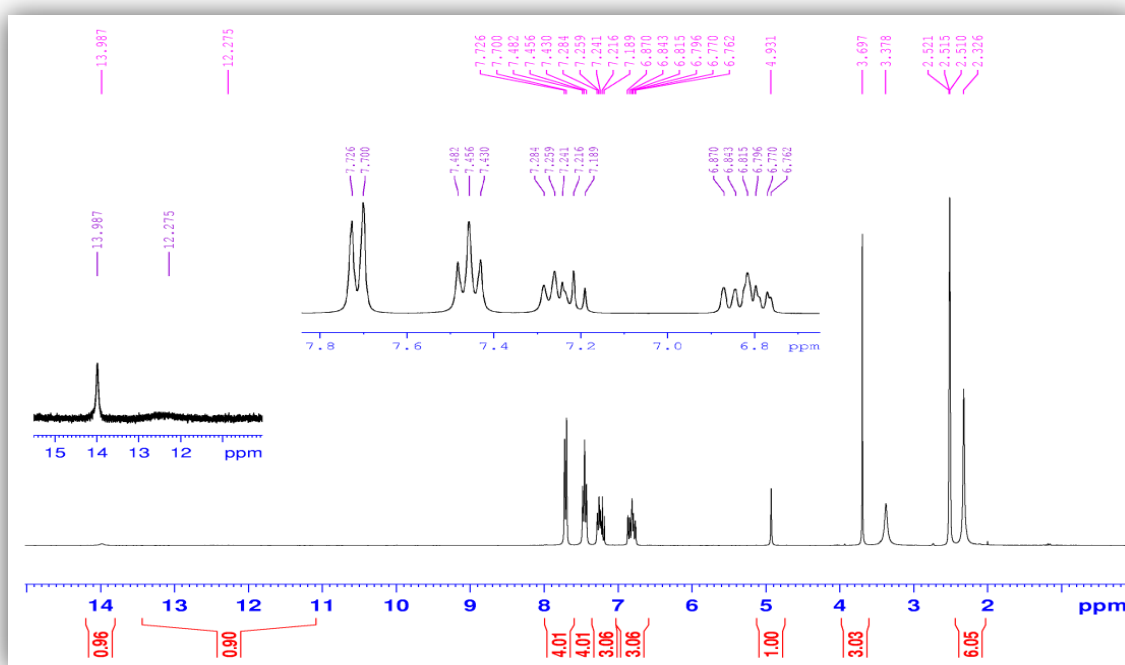

**Figure 6a:**  $^1\text{H}$  NMR (300 MHz,  $\text{DMSO-}d_6$ ) of 4,4'-((3-Methoxyphenyl)methylene)bis(3-methyl-1-phenyl-1H-pyrazol-5-ol)



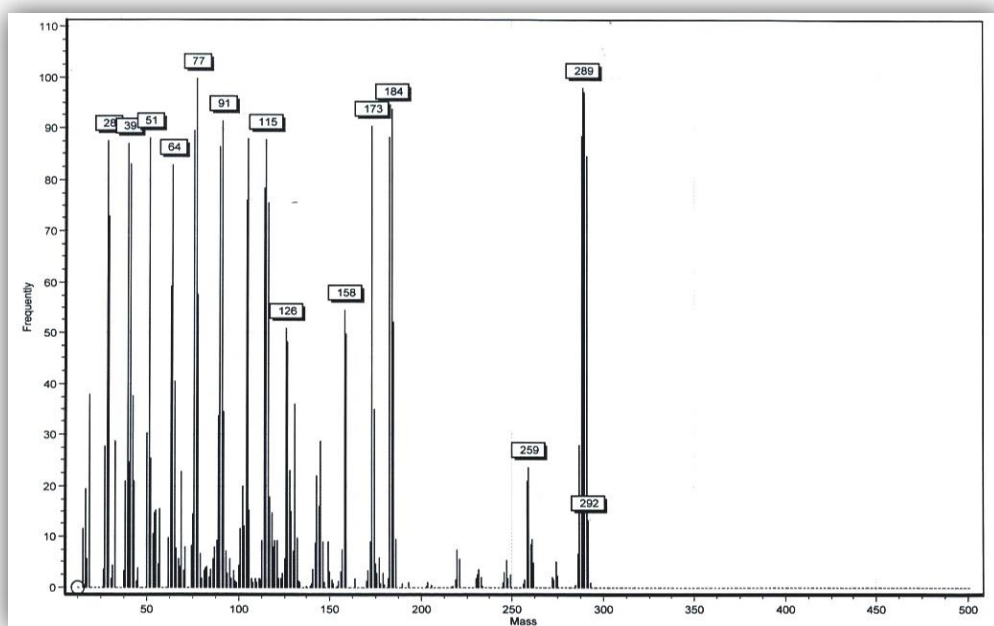

**Figure 6b:** Mass spectrum of 4,4'-((3-Methoxyphenyl)methylene)bis(3-methyl-1-phenyl-1H-pyrazol-5-ol).

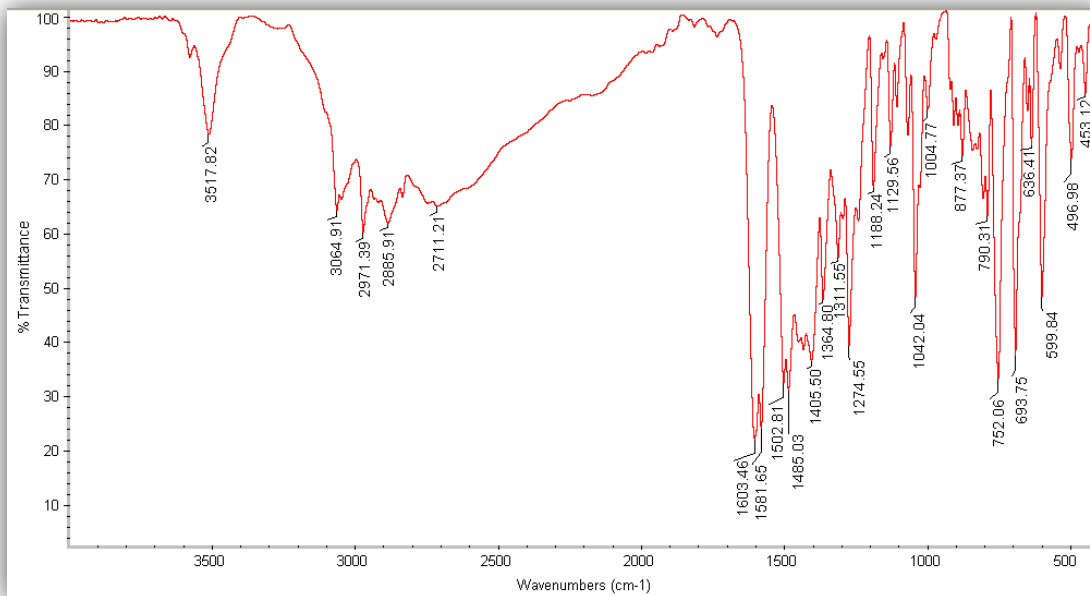

**Figure 6c:** FT-IR (KBr) spectrum of 4,4'-((3-Methoxyphenyl)methylene)bis(3-methyl-1-phenyl-1H-pyrazol-5-ol).

4,4'-(*p*-Tolylmethylene)bis(3-methyl-1-phenyl-1*H*-pyrazol-5-ol)(3g)

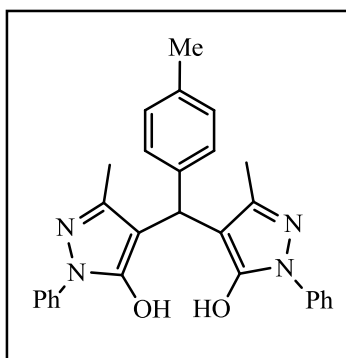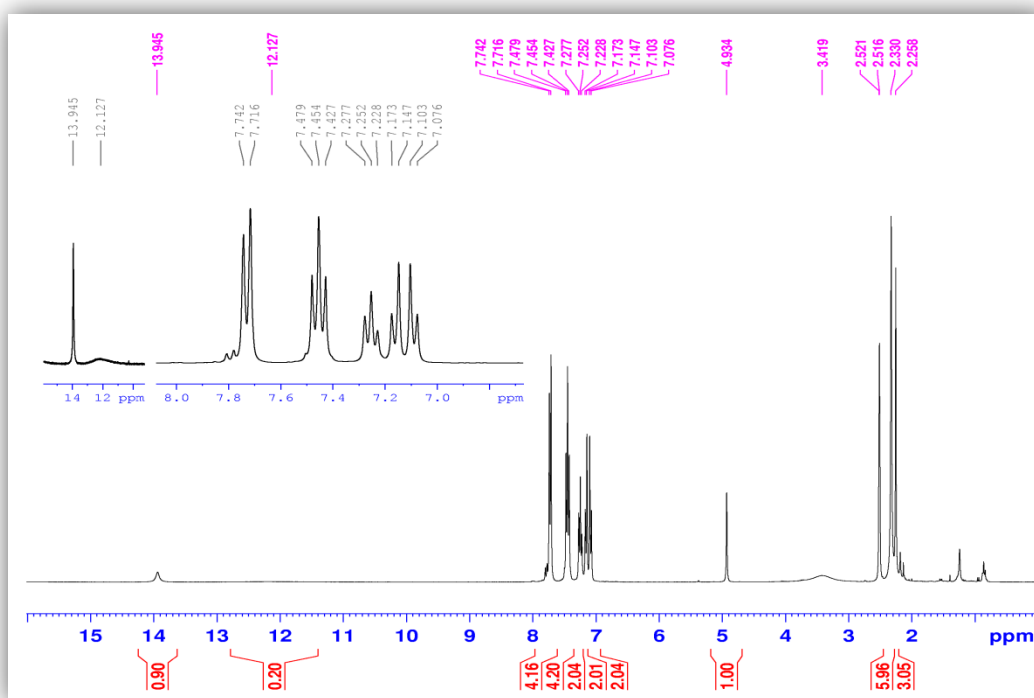

Figure 7a:  $^1\text{H}$  NMR (300 MHz,  $\text{DMSO-}d_6$ ) of 4,4'-(*p*-Tolylmethylene)bis(3-methyl-1-phenyl-1*H*-pyrazol-5-ol)

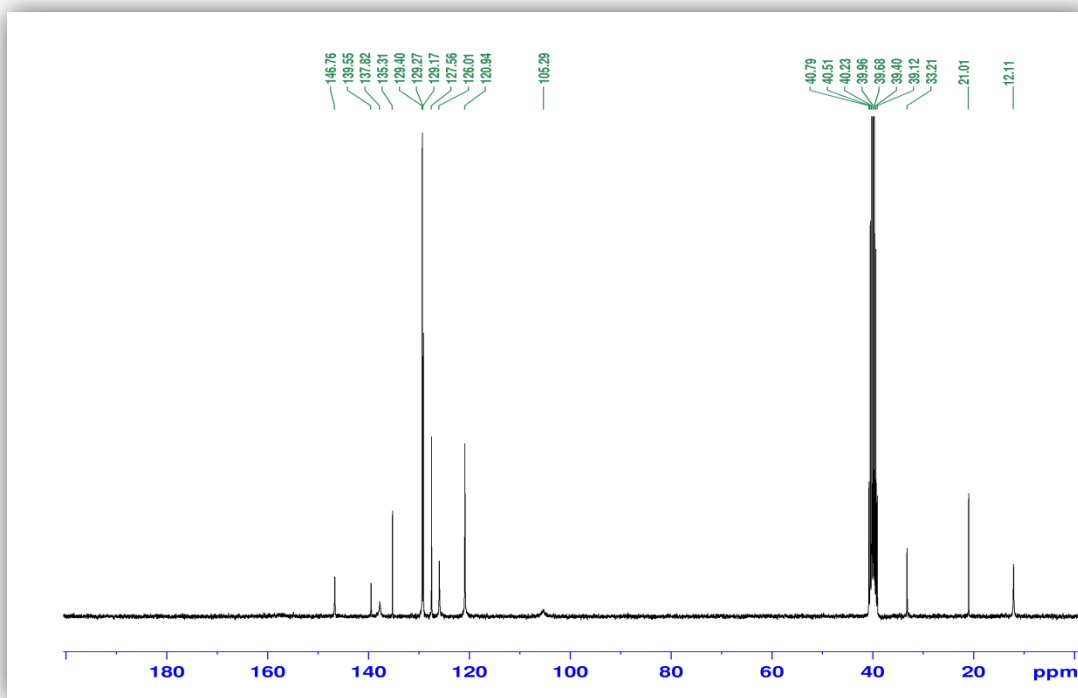

**Figure 7b:**  $^{13}\text{C}$  NMR (75 MHz,  $\text{DMSO-}d_6$ ) of 4,4'-(*p*-Tolylmethylene)bis(3-methyl-1-phenyl-1*H*-pyrazol-5-ol)

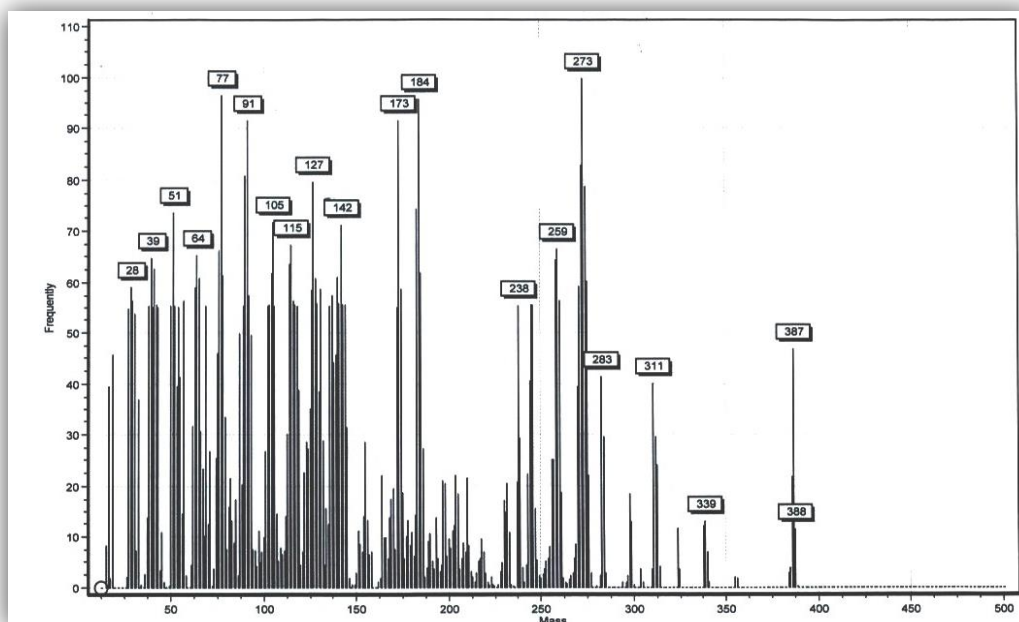

**Figure 7c:** Mass spectrum of 4,4'-(*p*-Tolylmethylene)bis(3-methyl-1-phenyl-1*H*-pyrazol-5-ol).

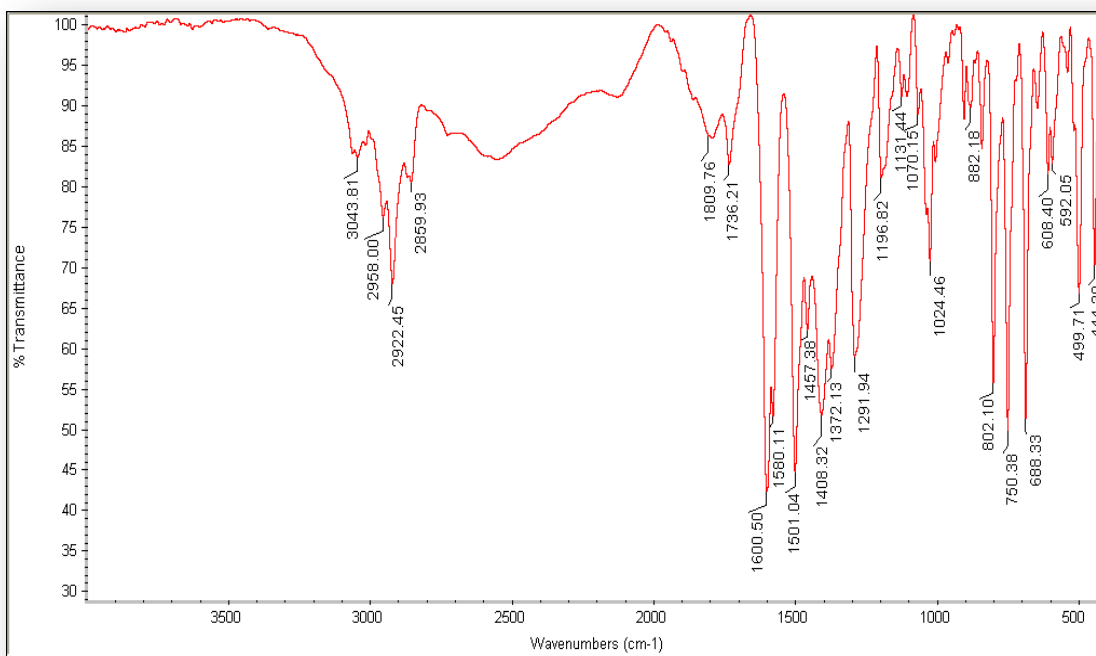

**Figure 7d:** FT-IR (KBr) spectrum of 4,4'-(*p*-Tolylmethylene)bis(3-methyl-1-phenyl-1*H*-pyrazol-5-ol).

**4,4'-(*m*-Tolylmethylene)bis(3-methyl-1-phenyl-1*H*-pyrazol-5-ol) (3h)**

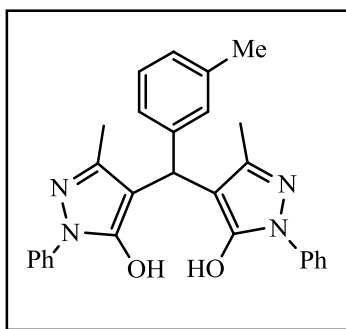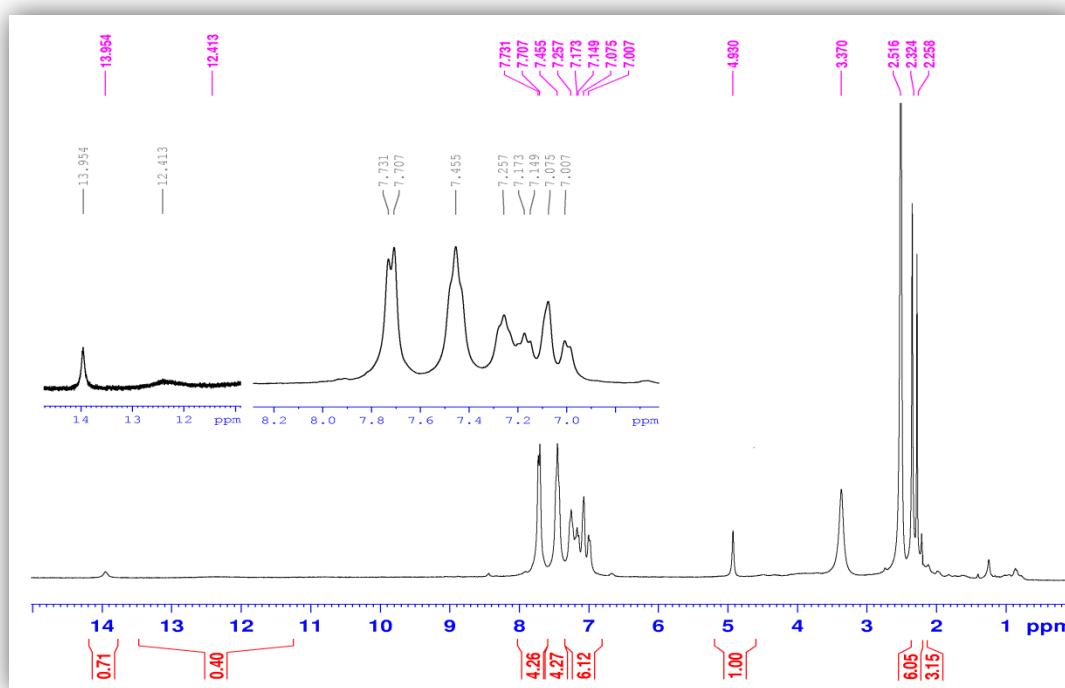

**Figure 8a:**  $^1\text{H}$  NMR (300 MHz,  $\text{DMSO-}d_6$ ) of 4,4'-(*m*-Tolylmethylene)bis(3-methyl-1-phenyl-1*H*-pyrazol-5-ol).

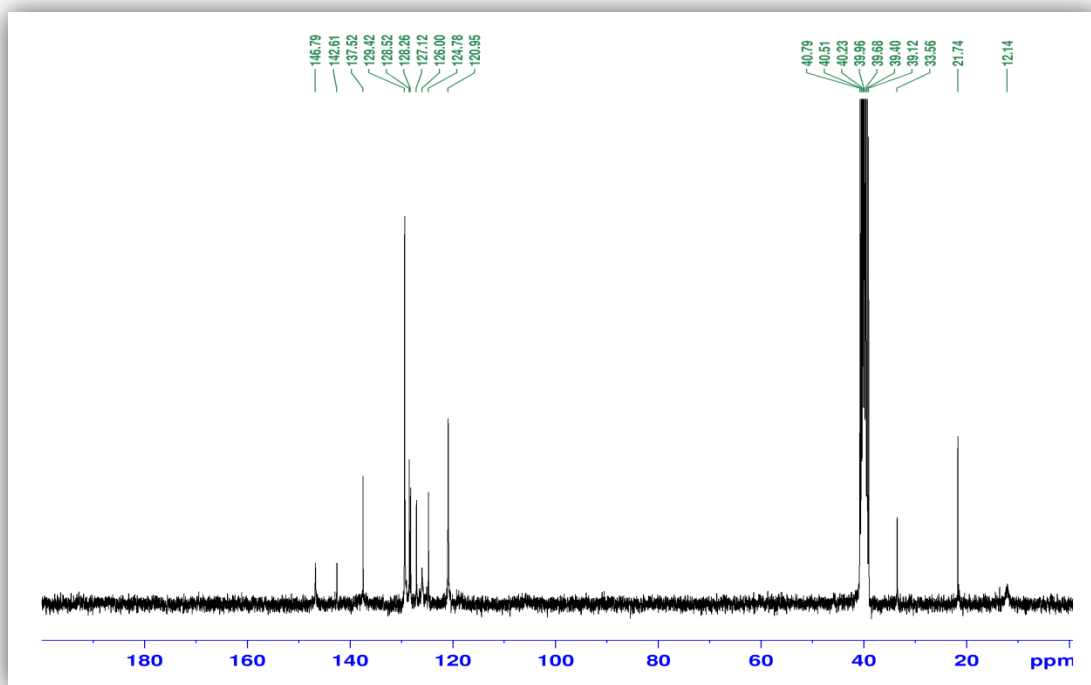

**Figure 8b:**  $^{13}\text{C}$  NMR (75 MHz,  $\text{DMSO-}d_6$ ) of 4,4'-(*m*-Tolylmethylene)bis(3-methyl-1-phenyl-1*H*-pyrazol-5-ol).

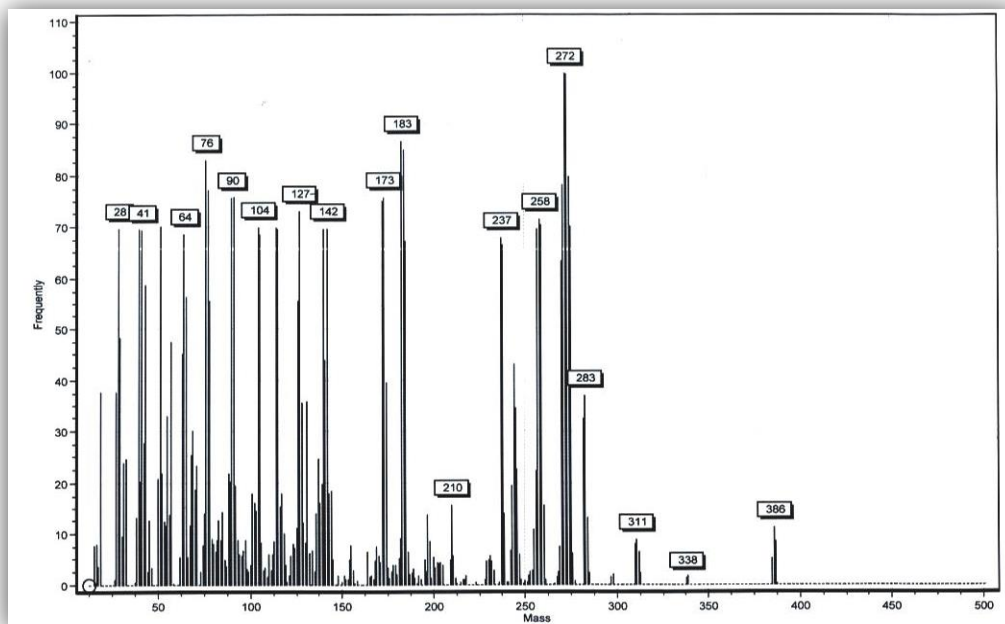

**Figure 8c:** Mass spectrum of 4,4'-(*m*-Tolylmethylene)bis(3-methyl-1-phenyl-1*H*-pyrazol-5-ol).

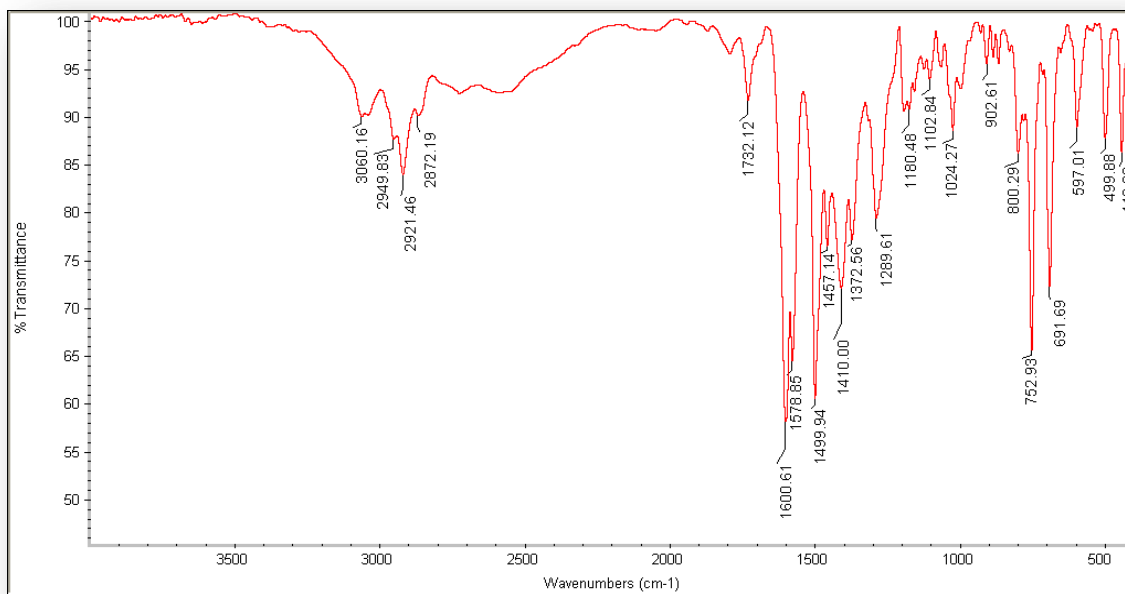

**Figure 8d:** FT-IR (KBr) spectrum of 4,4'-(*m*-Tolylmethylene)bis(3-methyl-1-phenyl-1*H*-pyrazol-5-ol).

4,4'-((5-Bromo-2-hydroxyphenyl)methylene)bis(3-methyl-1-phenyl-1H-pyrazol-5-ol) (3i)

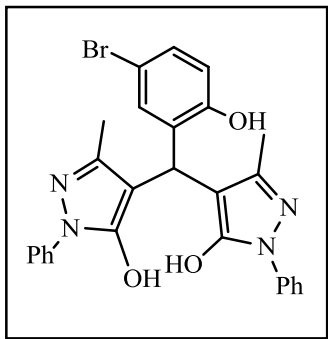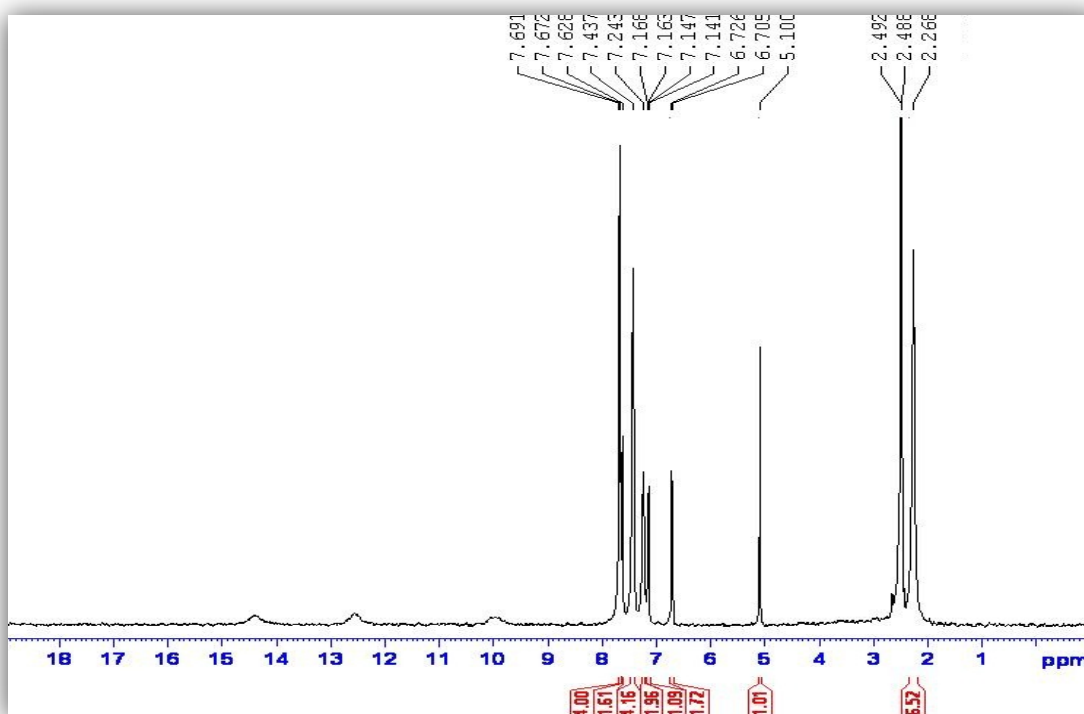

**Figure 9a:**  $^1\text{H}$  NMR (400 MHz,  $\text{DMSO}-d_6$ ) of 4,4'-((5-Bromo-2-hydroxyphenyl)methylene)bis(3-methyl-1-phenyl-1H-pyrazol-5-ol).



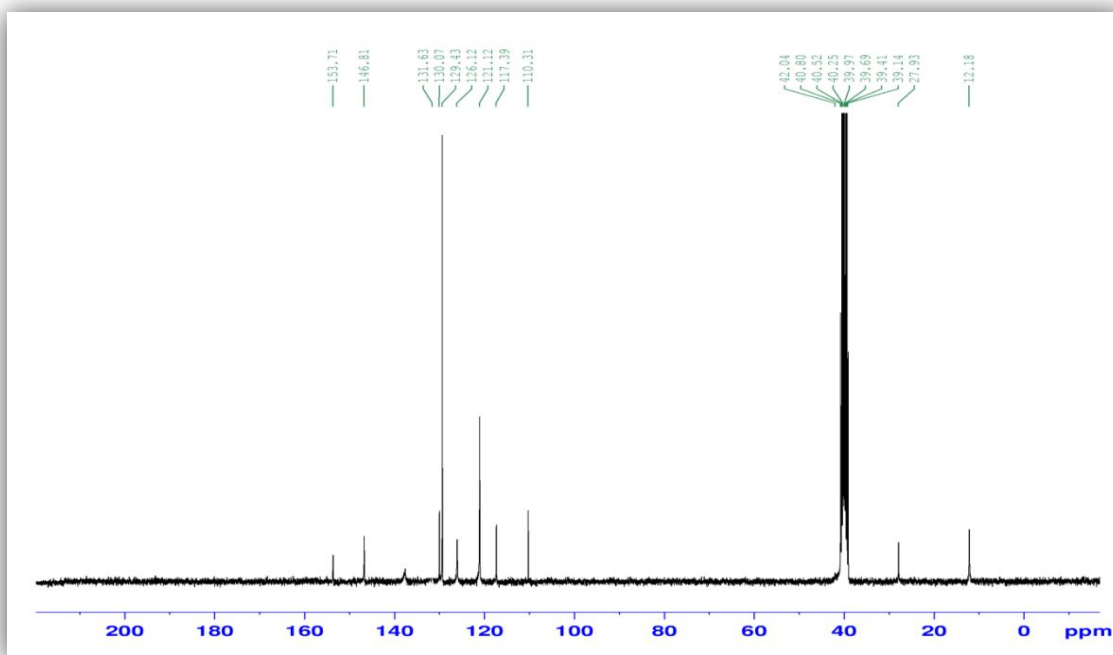

**Figure 9b:**  $^{13}\text{C}$  NMR (75 MHz,  $\text{DMSO-}d_6$ ) of 4,4'-((5-Bromo-2-hydroxyphenyl)methylene)bis(3-methyl-1-phenyl-1*H*-pyrazol-5-ol).

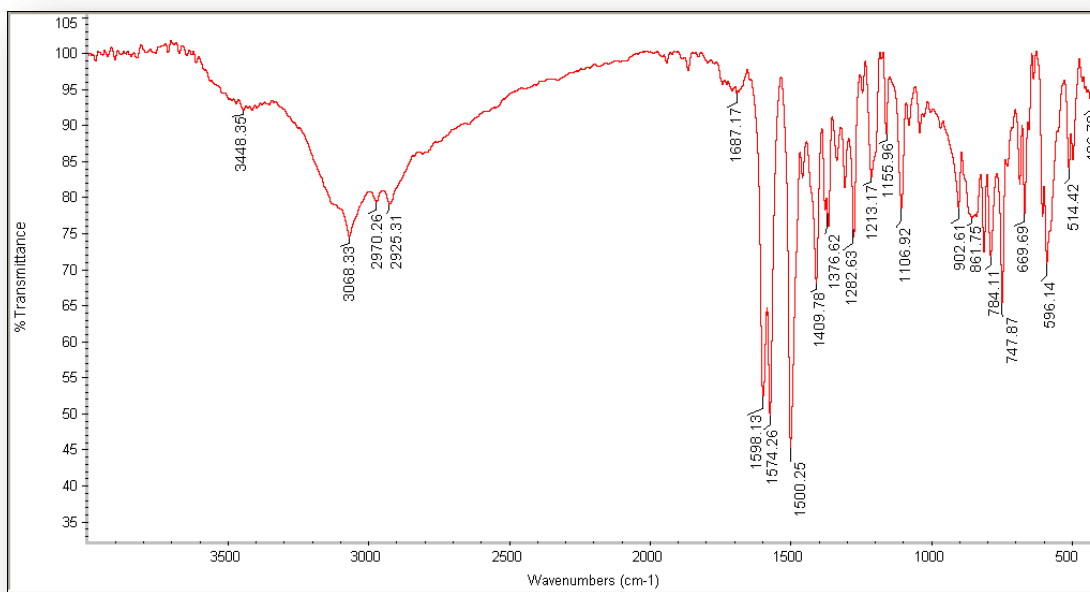

**Figure 9c:** FT-IR (KBr) spectrum of 4,4'-((5-Bromo-2-hydroxyphenyl)methylene)bis(3-methyl-1-phenyl-1*H*-pyrazol-5-ol).

**4,4'-((4-Isopropylphenyl)methylene)bis(3-methyl-1-phenyl-1H-pyrazol-5-ol) (3j)**

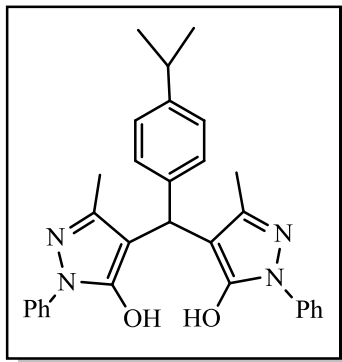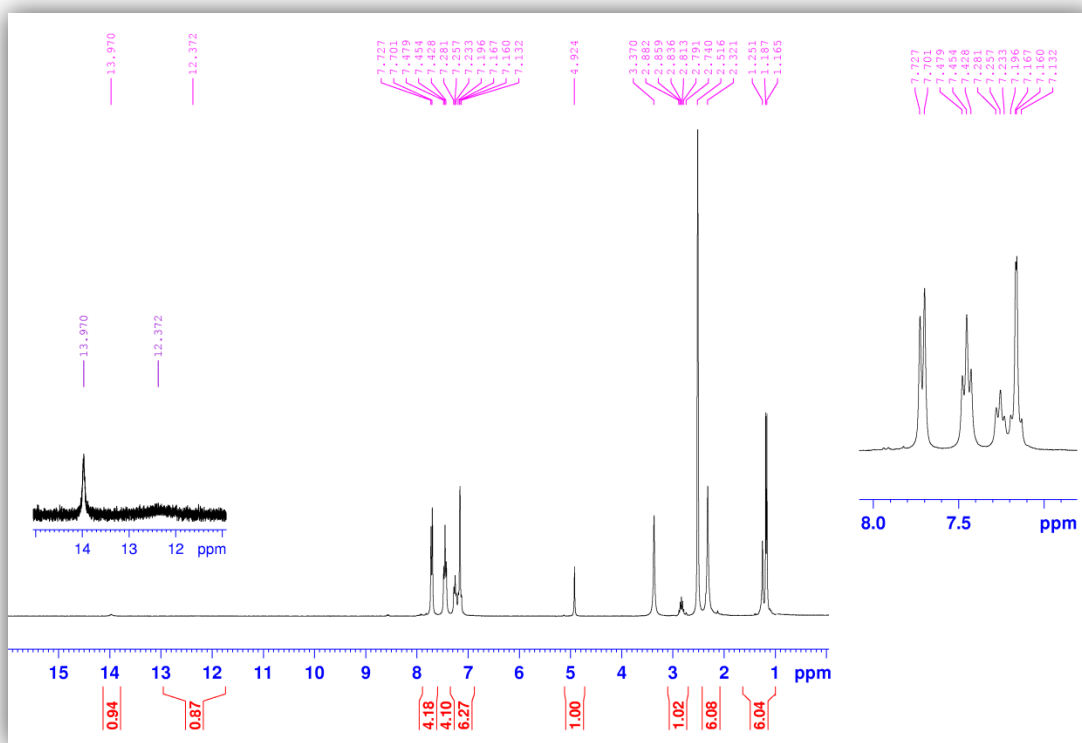

**Figure 10a:**  $^1\text{H}$  NMR (300 MHz,  $\text{DMSO-}d_6$ ) of 4,4'-((4-Isopropylphenyl)methylene)bis(3-methyl-1-phenyl-1H-pyrazol-5-ol)

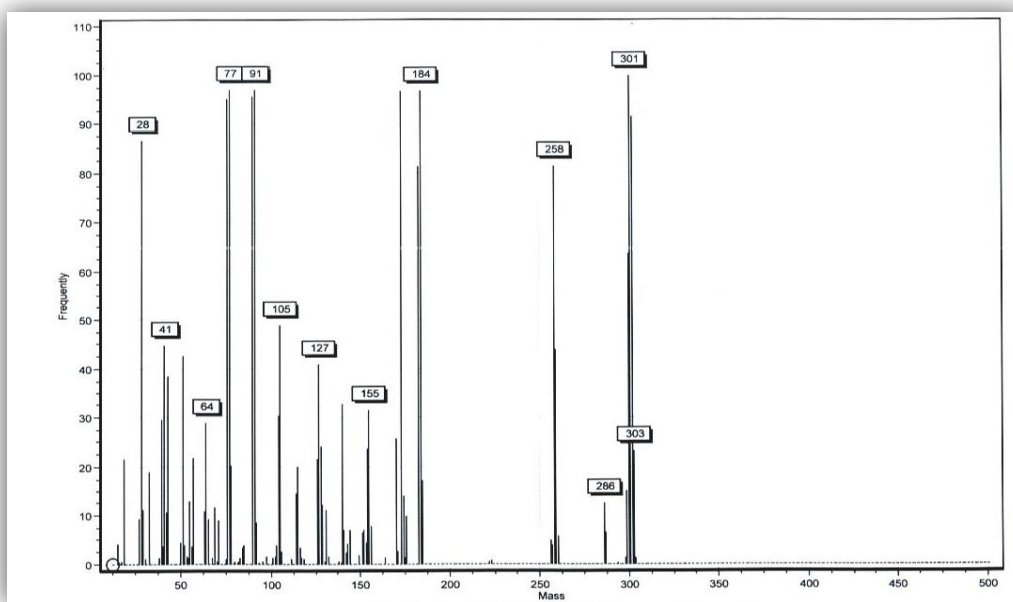

**Figure 10b:** Mass spectrum of 4,4'-((4-Isopropylphenyl)methylene)bis(3-methyl-1-phenyl-1*H*-pyrazol-5-ol).

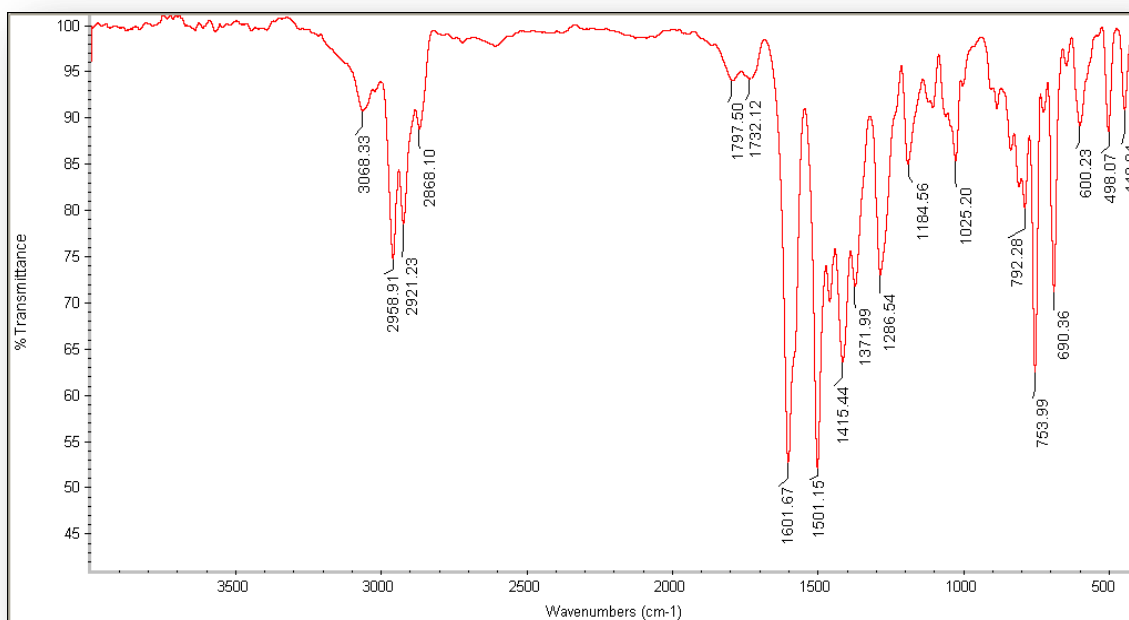

**Figure 10c:** FT-IR (KBr) spectrum of 4,4'-((4-Isopropylphenyl)methylene)bis(3-methyl-1-phenyl-1*H*-pyrazol-5-ol).

4,4'-((2-Chlorophenyl)methylene)bis(3-methyl-1-phenyl-1H-pyrazol-5-ol) (3k)

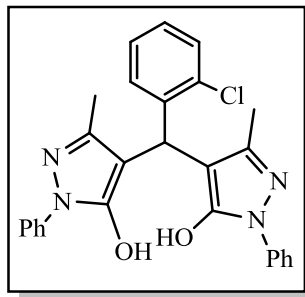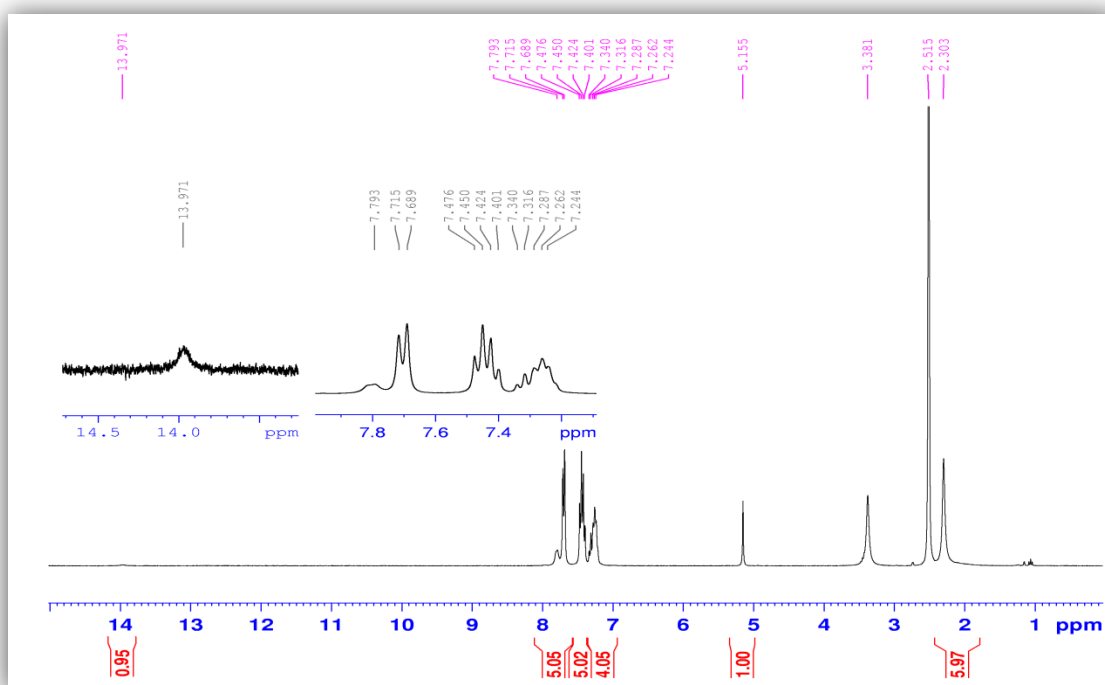

**Figure 11a:**  $^1\text{H}$  NMR (300 MHz,  $\text{DMSO-}d_6$ ) of 4,4'-((2-Chlorophenyl)methylene)bis(3-methyl-1-phenyl-1H-pyrazol-5-ol)

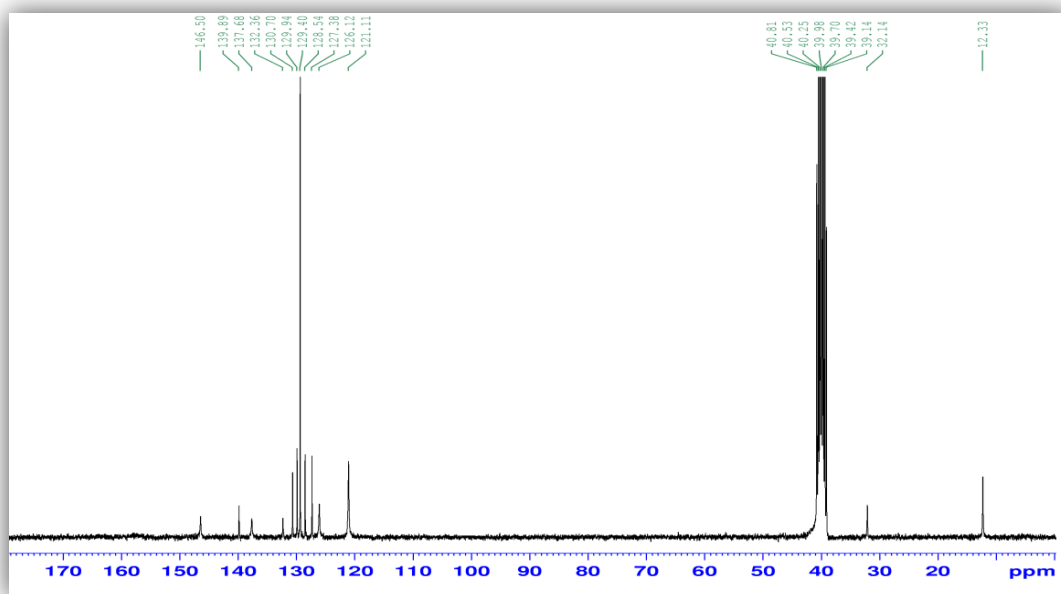

**Figure 11b:**  $^{13}\text{C}$  NMR (75 MHz,  $\text{DMSO-}d_6$ ) of 4,4'-((2-Chlorophenyl)methylene)bis(3-methyl-1-phenyl-1*H*-pyrazol-5-ol).

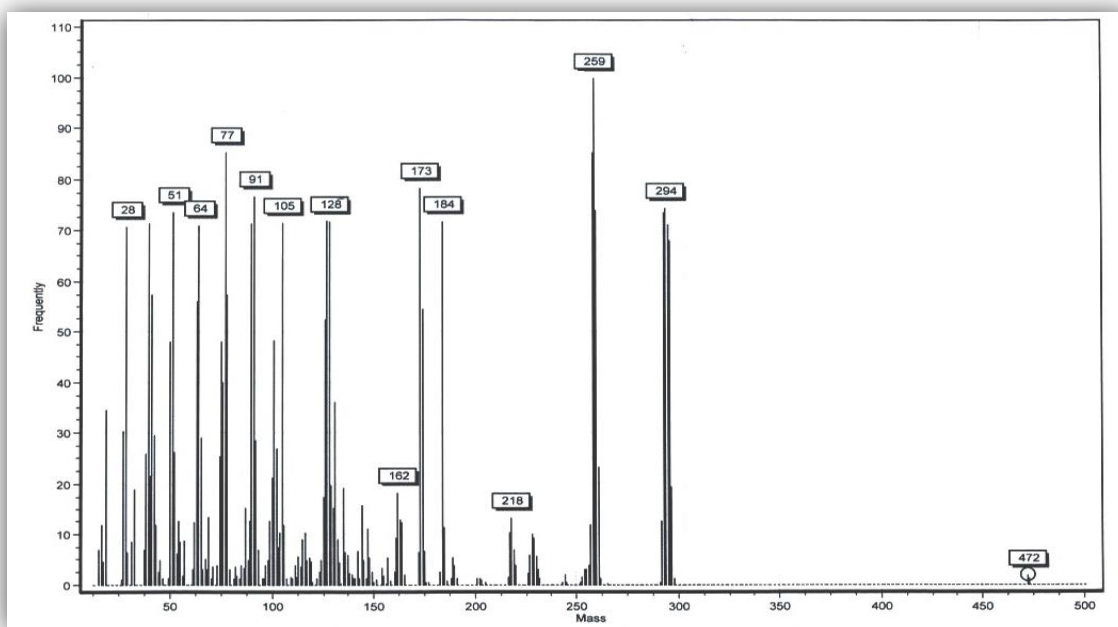

**Figure 11c:** Mass spectrum of 4,4'-((2-Chlorophenyl)methylene)bis(3-methyl-1-phenyl-1*H*-pyrazol-5-ol).

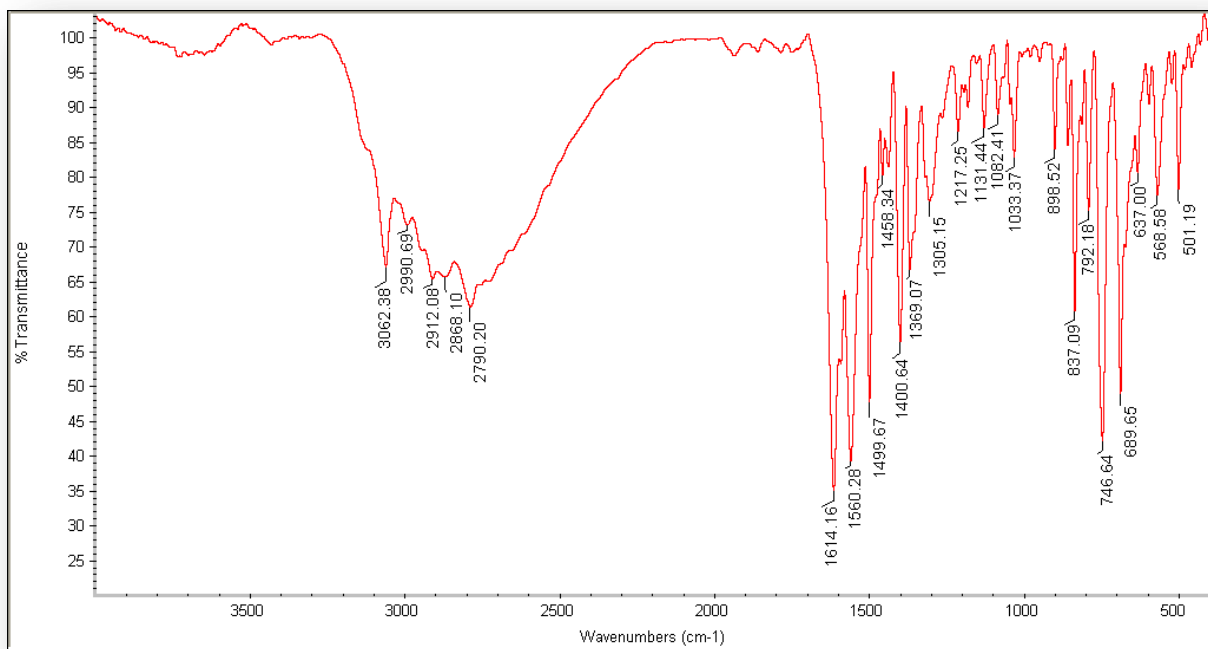

**Figure 11d:** FT-IR (KBr) spectrum of 4,4'-((2-Chlorophenyl)methylene)bis(3-methyl-1-phenyl-1*H*-pyrazol-5-ol).

**4,4'-((4-Chlorophenyl)methylene)bis(3-methyl-1-phenyl-1H-pyrazol-5-ol) (3l)**

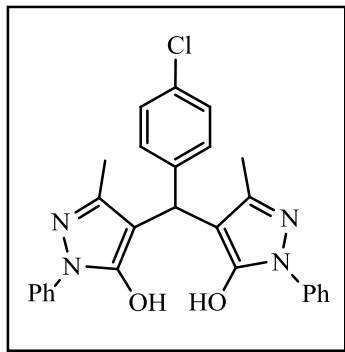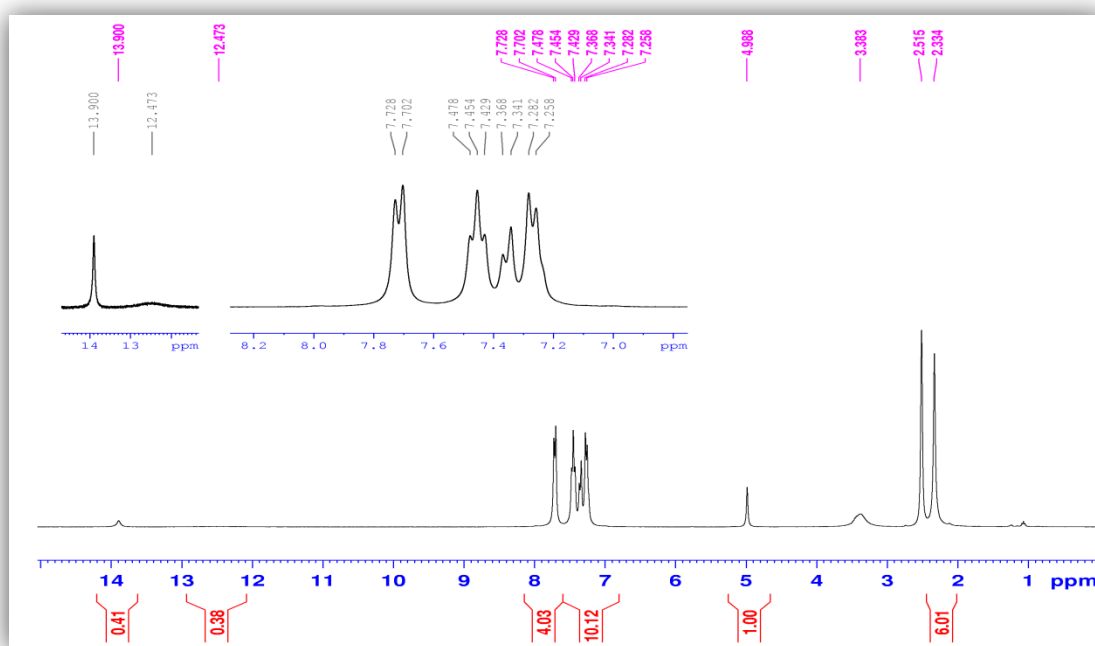

**Figure 12a:**  $^1\text{H}$  NMR (300 MHz,  $\text{DMSO-}d_6$ ) of 4,4'-((4-Chlorophenyl)methylene)bis(3-methyl-1-phenyl-1H-pyrazol-5-ol).

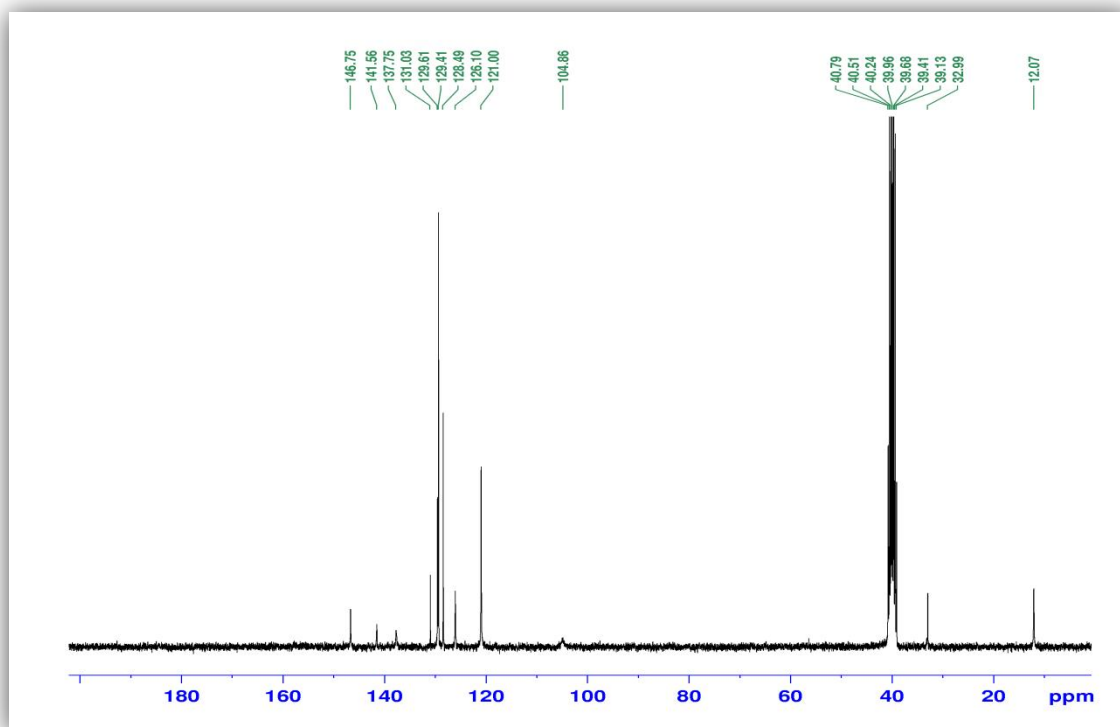

**Figure 12b:**  $^{13}\text{C}$  NMR (75 MHz,  $\text{DMSO-}d_6$ ) of 4,4'-((4-chlorophenyl)methylene)bis(3-methyl-1-phenyl-1H-pyrazol-5-ol).



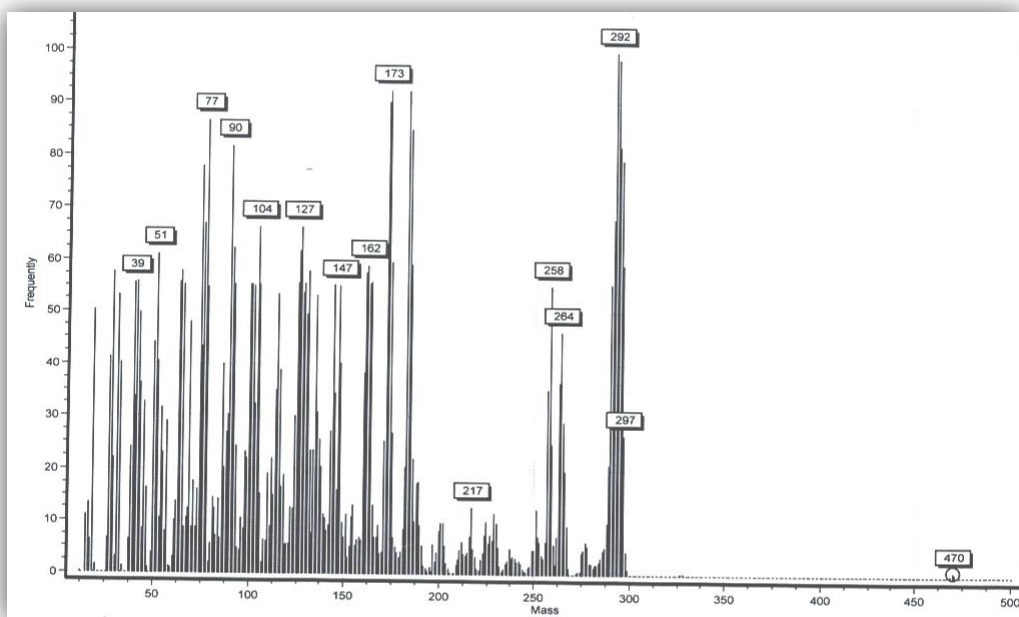

**Figure 12c:** Mass spectrum of 4,4'-((4-chlorophenyl)methylene)bis(3-methyl-1-phenyl-1H-pyrazol-5-ol).

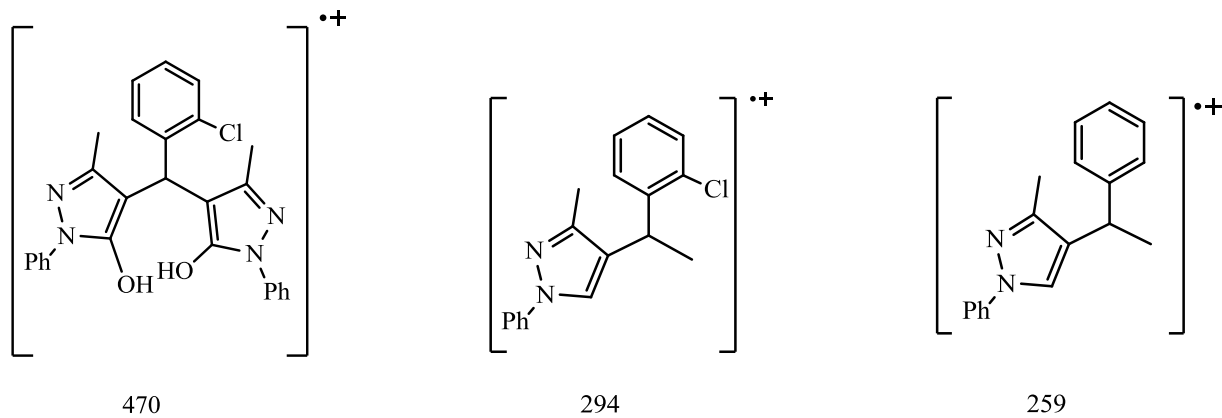

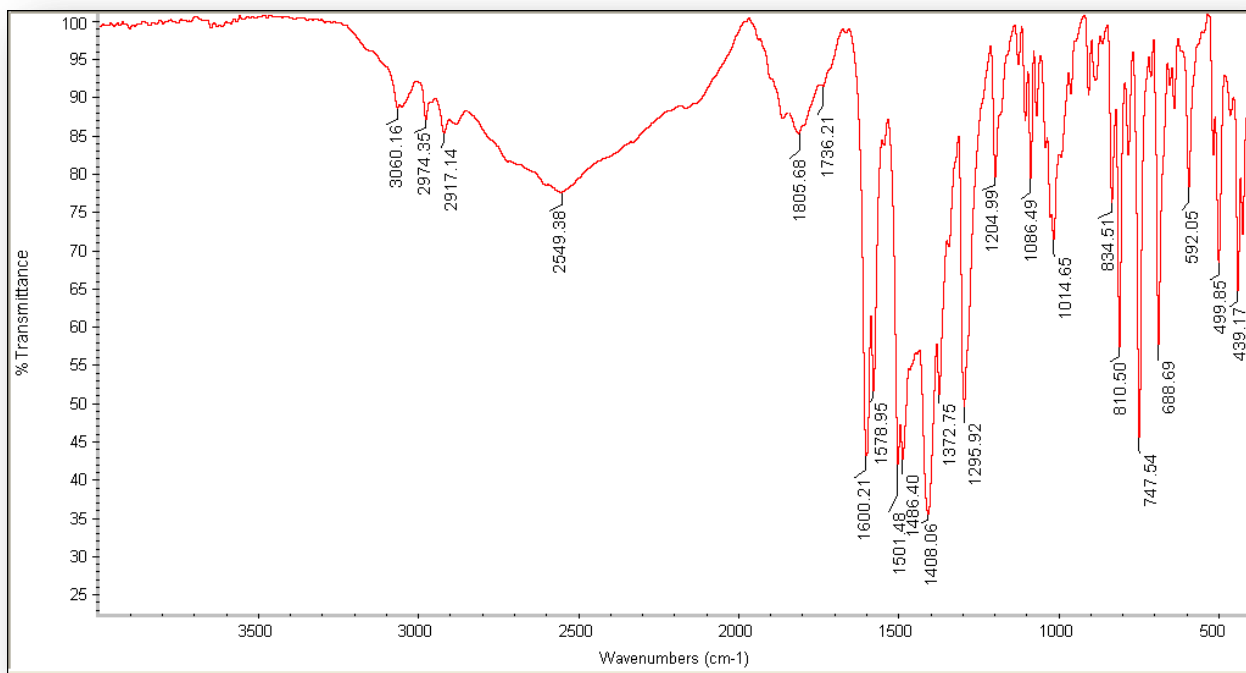

**Figure 12d:** FT-IR (KBr) spectrum of 4,4'-((4-Chlorophenyl)methylene)bis(3-methyl-1-phenyl-1H-pyrazol-5-ol).

4,4'-((2,4-Dichlorophenyl)methylene)bis(3-methyl-1-phenyl-1H-pyrazol-5-ol) (3m)

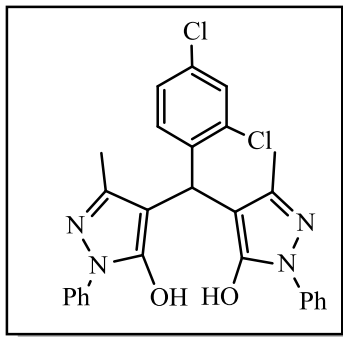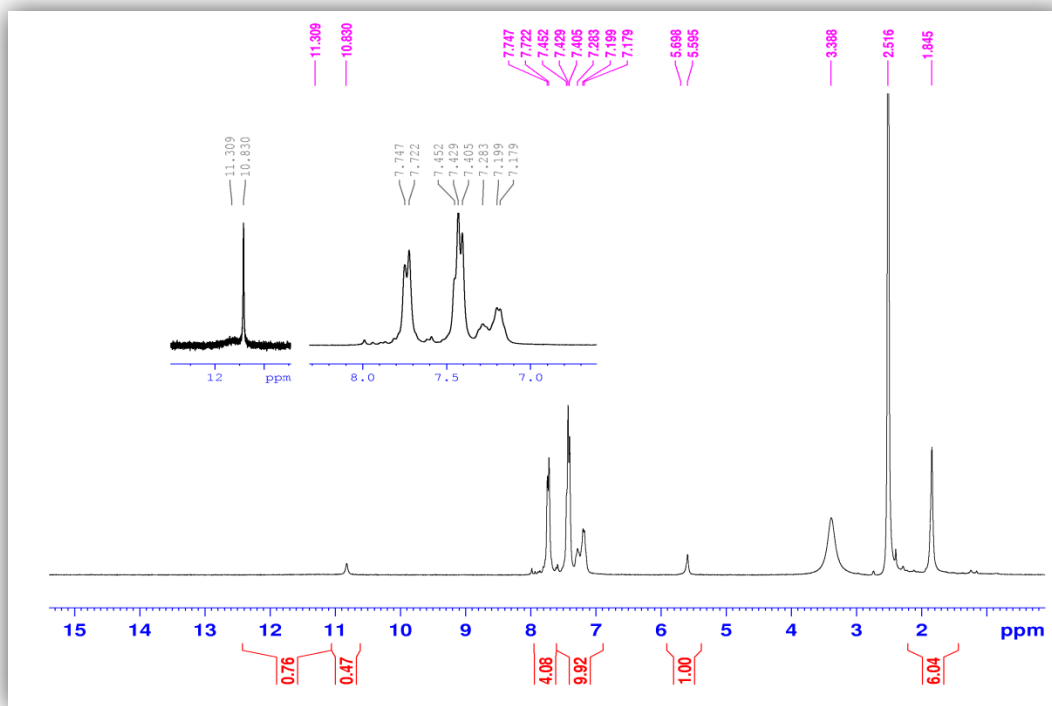

**Figure 13a:**  $^1\text{H}$  NMR (300 MHz,  $\text{DMSO-}d_6$ ) of 4,4'-((2,4-Dichlorophenyl)methylene)bis(3-methyl-1-phenyl-1H-pyrazol-5-ol).

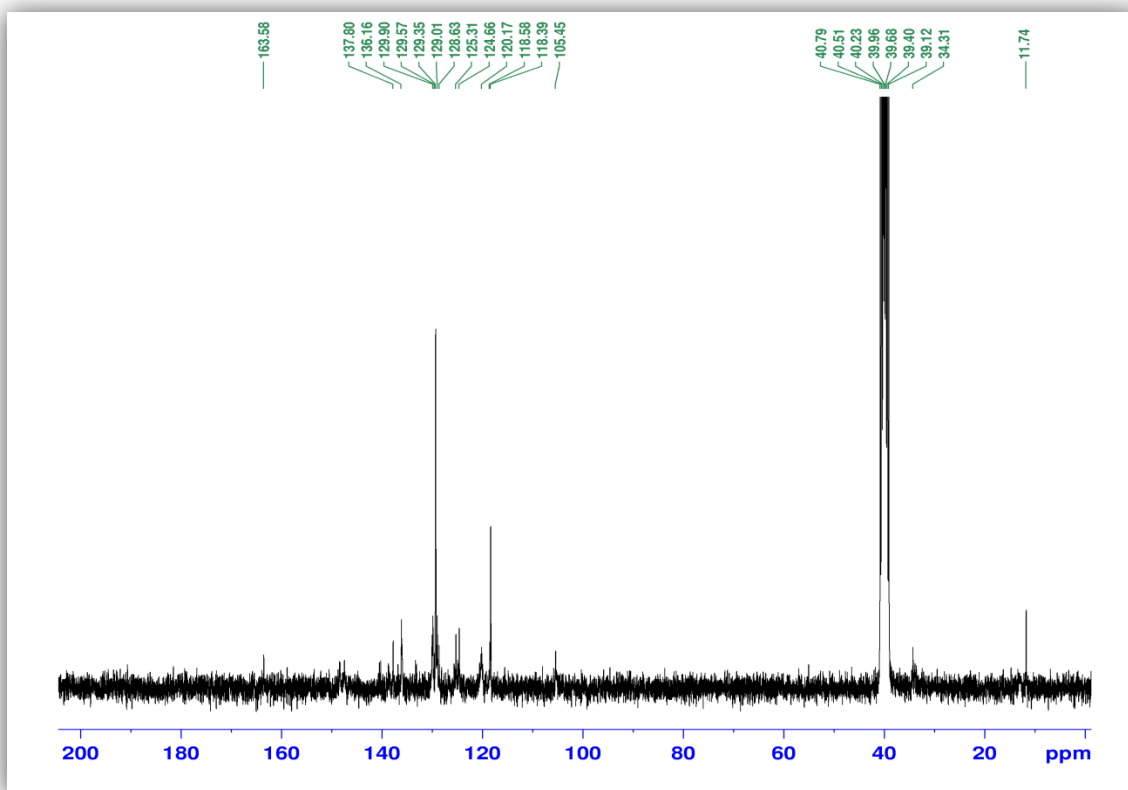

**Figure 13b:**  $^{13}\text{C}$  NMR (75 MHz,  $\text{DMSO-}d_6$ ) of 4,4'-((2,4-Dichlorophenyl)methylene)bis(3-methyl-1H-pyrazol-5-ol).

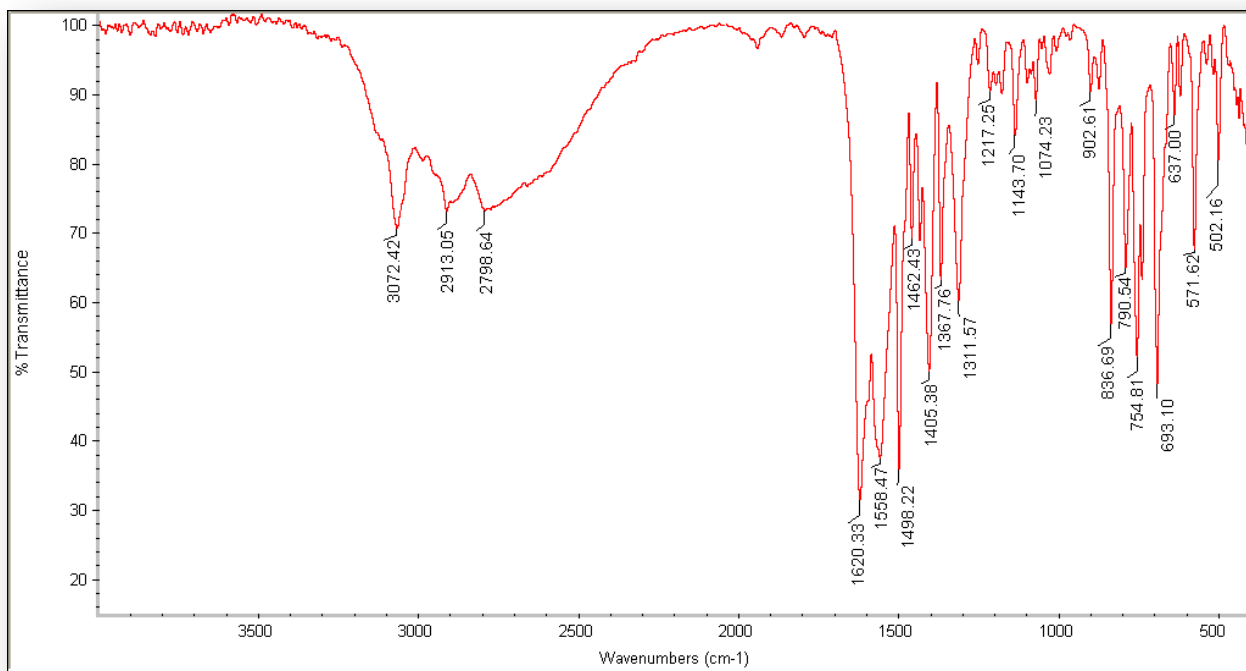

**Figure 13c:** FT-IR (KBr) spectrum of 4,4'-((2,4-Dichlorophenyl)methylene)bis(3-methyl-1-phenyl-1H-pyrazol-5-ol).

4,4'-((4-Bromophenyl)methylene)bis(3-methyl-1-phenyl-1H-pyrazol-5-ol) (3n)

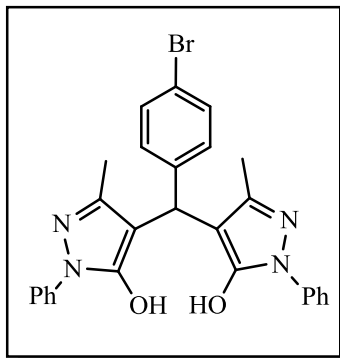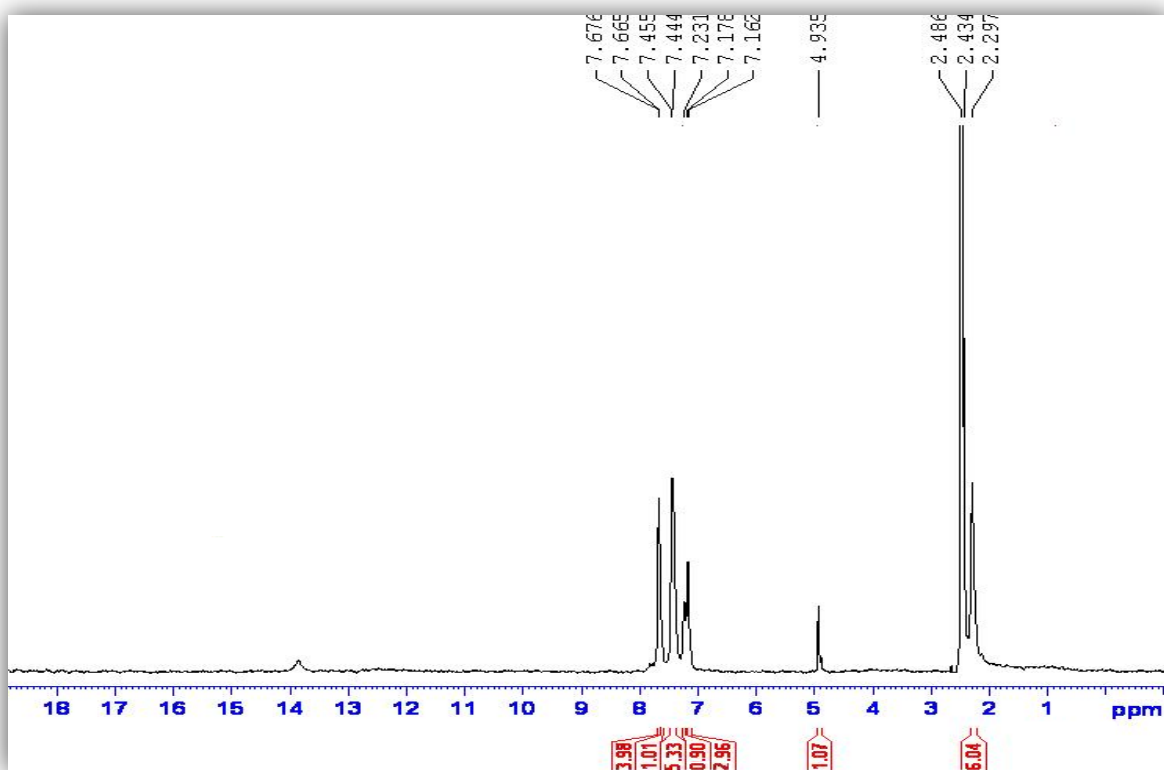

**Figure 14a:**  $^1\text{H}$  NMR (400 MHz,  $\text{DMSO-}d_6$ ) of 4,4'-((4-Bromophenyl)methylene)bis(3-methyl-1-phenyl-1H-pyrazol-5-ol).

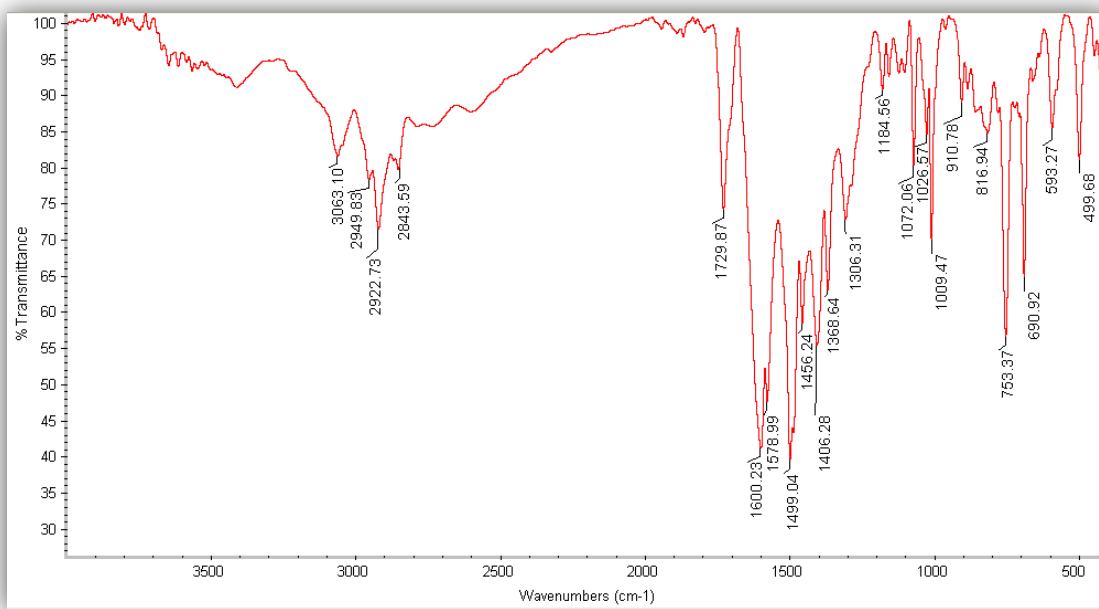

**Figure 14b:** FT-IR (KBr) spectrum of 4,4'-((4-Bromophenyl)methylene)bis(3-methyl-1-phenyl-1H-pyrazol-5-ol).

**4,4'-((3-Nitrophenyl)methylene)bis(3-methyl-1-phenyl-1H-pyrazol-5-ol) (3o)**

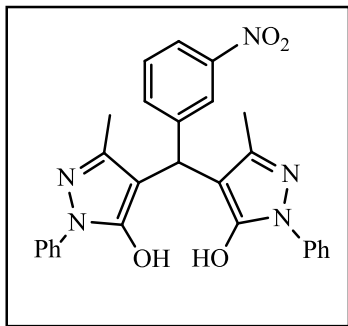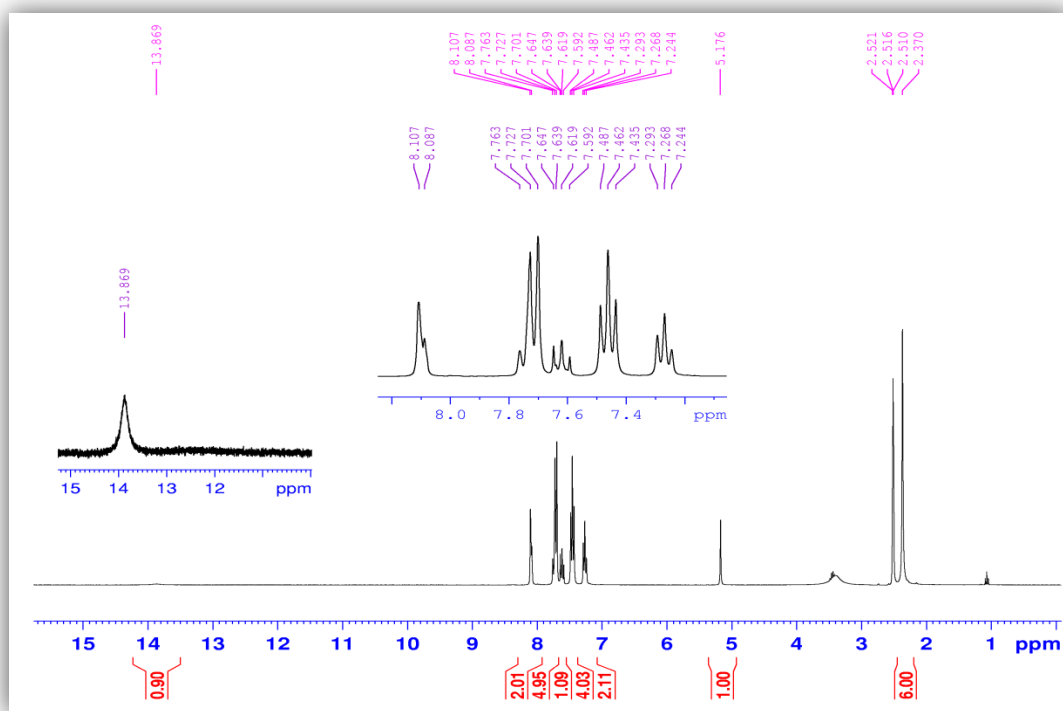

**Figure 15a:**  $^1\text{H}$  NMR (300 MHz,  $\text{DMSO-}d_6$ ) of 4, 4'-((3-Nitrophenyl)methylene)bis(3-methyl-1-phenyl-1H-pyrazol-5-ol)



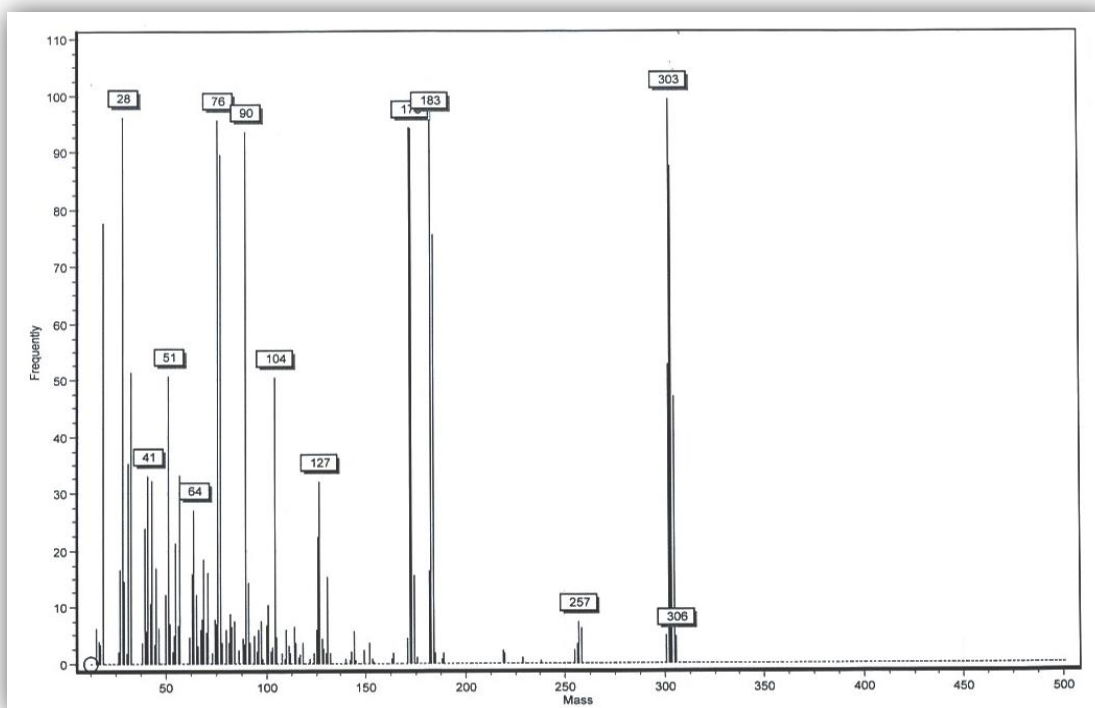

**Figure 15b:** Mass spectrum of 4, 4'-((3-Nitrophenyl)methylene)bis(3-methyl-1-phenyl-1*H*-pyrazol-5-ol).

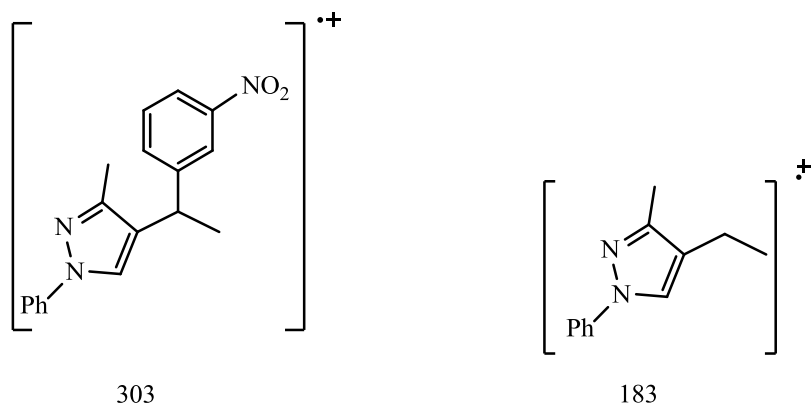

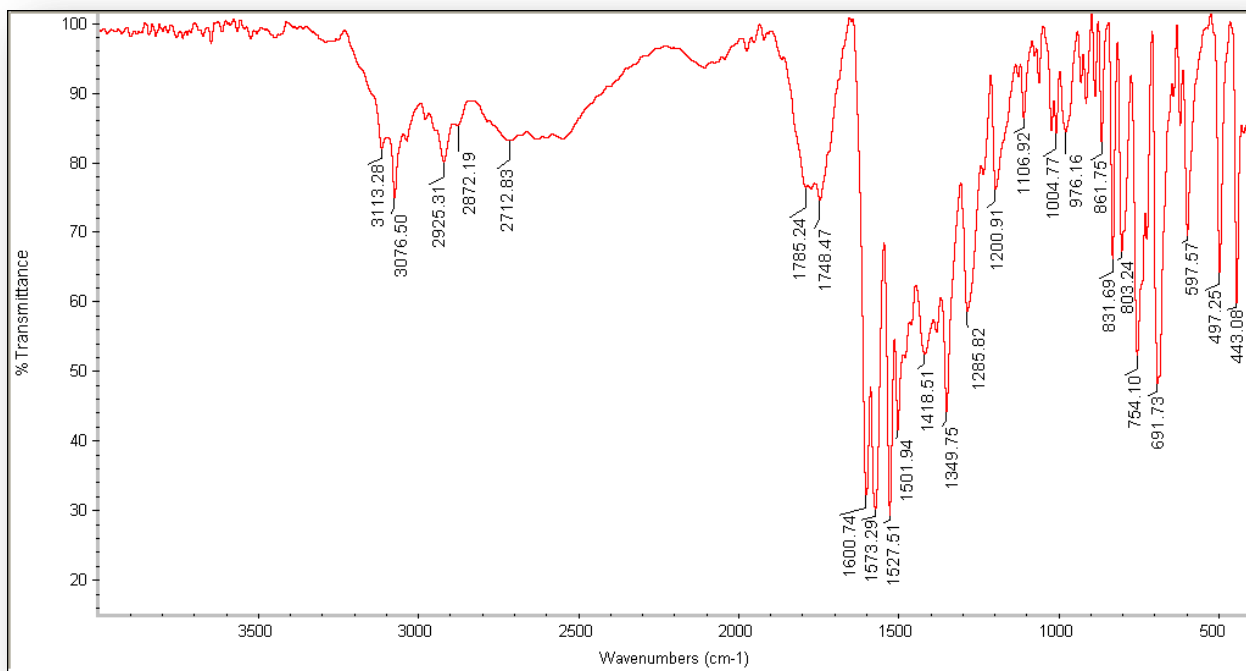

**Figure 15c:** FT-IR (KBr) spectrum of 4,4'-((3-Nitrophenyl)methylene)bis(3-methyl-1-phenyl-1H-pyrazol-5-ol).

4,4'-((2-Nitrophenyl)methylene)bis(3-methyl-1-phenyl-1H-pyrazol-5-ol) (3p)

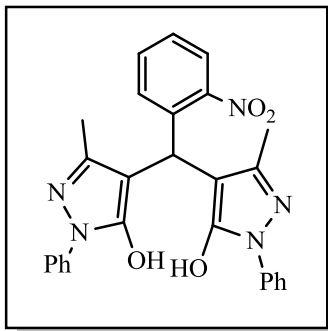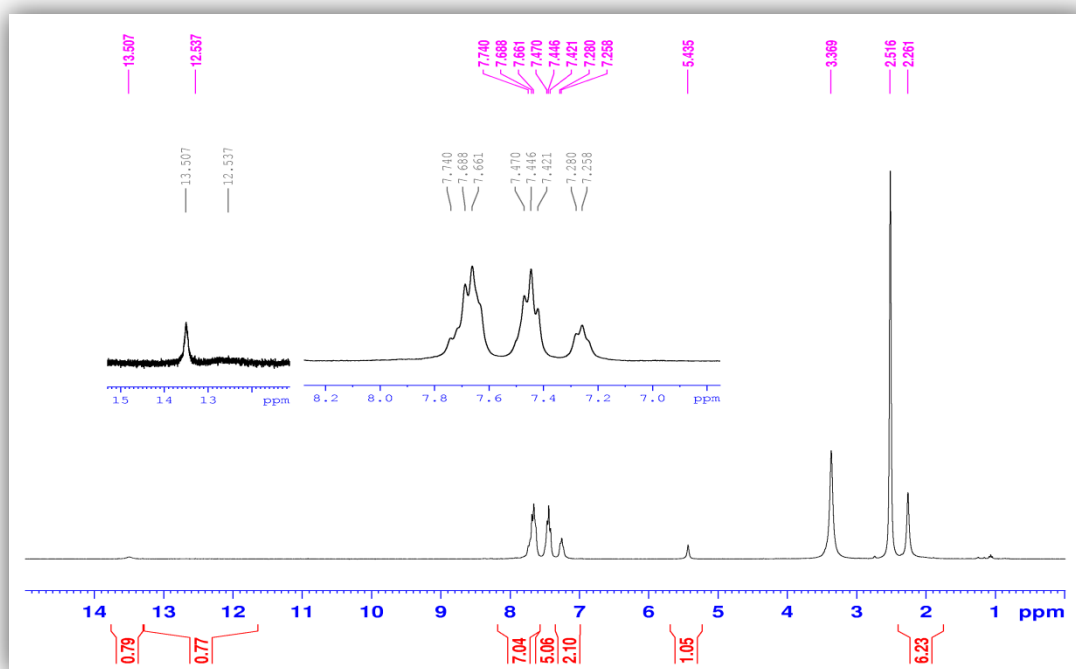

Figure 16a:  $^1\text{H}$  NMR (300 MHz,  $\text{DMSO}-d_6$ ) of 4, 4'-((2-Nitrophenyl)methylene)bis(3-methyl-1-phenyl-1H-pyrazol-5-ol).

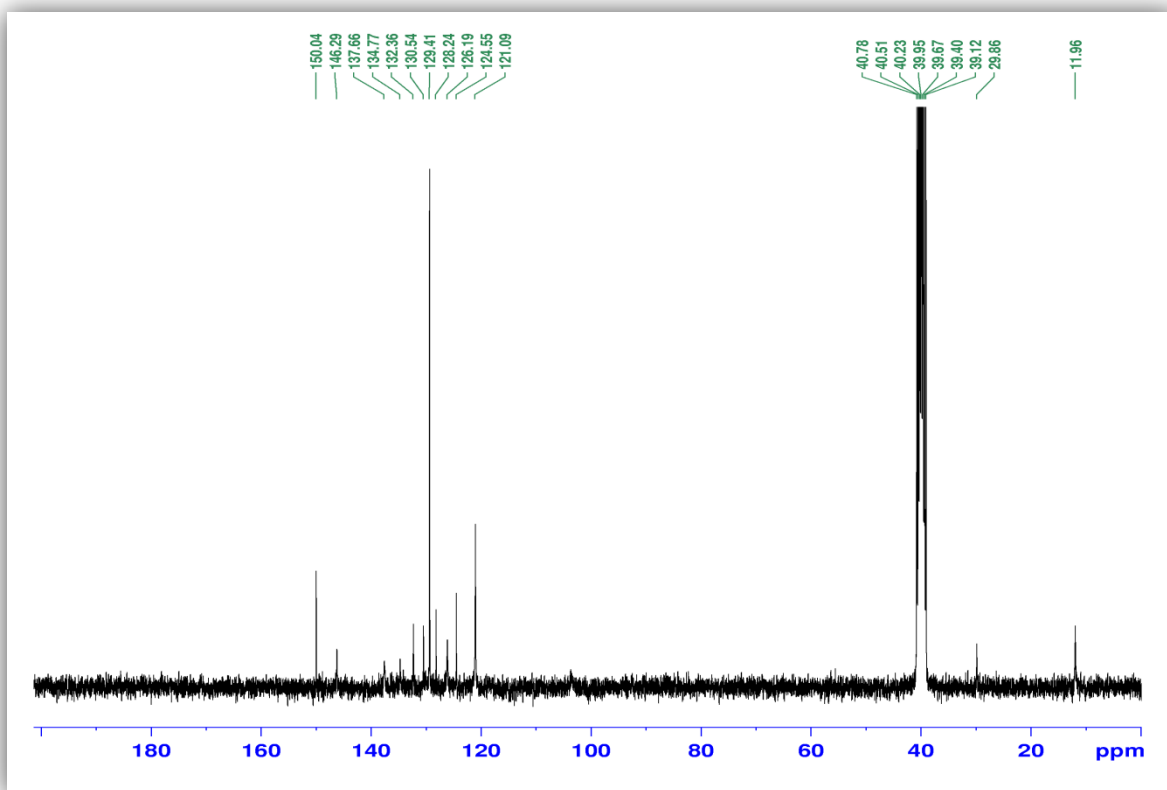

**Figure 16b:**  $^{13}\text{C}$  NMR (75 MHz,  $\text{DMSO}-d_6$ ) of 4, 4'-((2-Nitrophenyl)methylene)bis(3-methyl-1-phenyl-1H-pyrazol-5-ol)

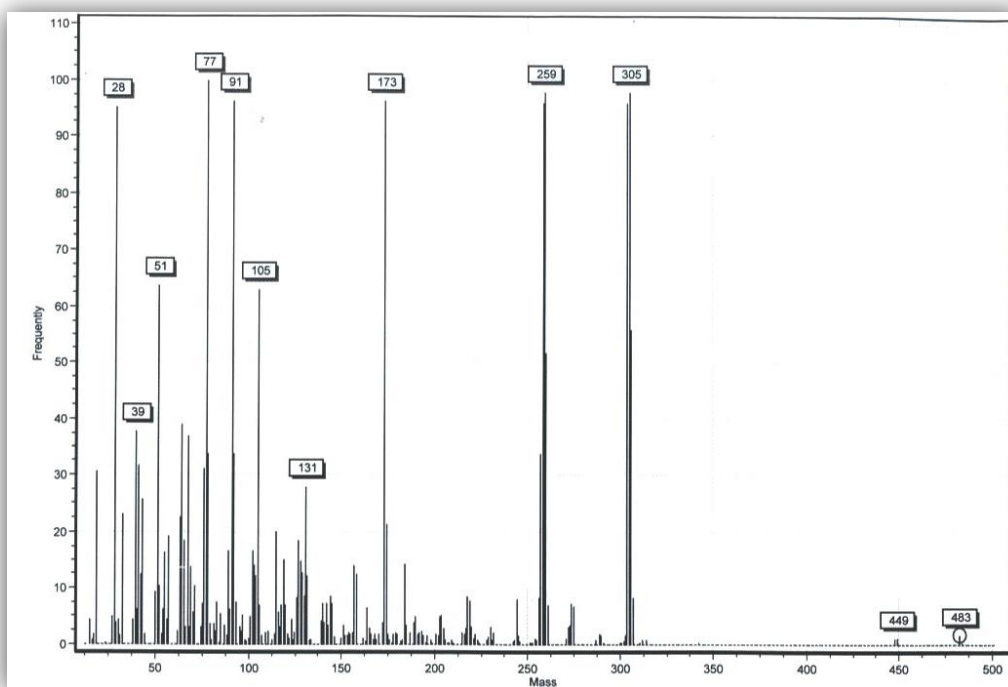

**Figure 16c:** Mass spectrum of 4,4'-((2-Nitrophenyl)methylene)bis(3-methyl-1-phenyl-1H-pyrazol-5-ol).

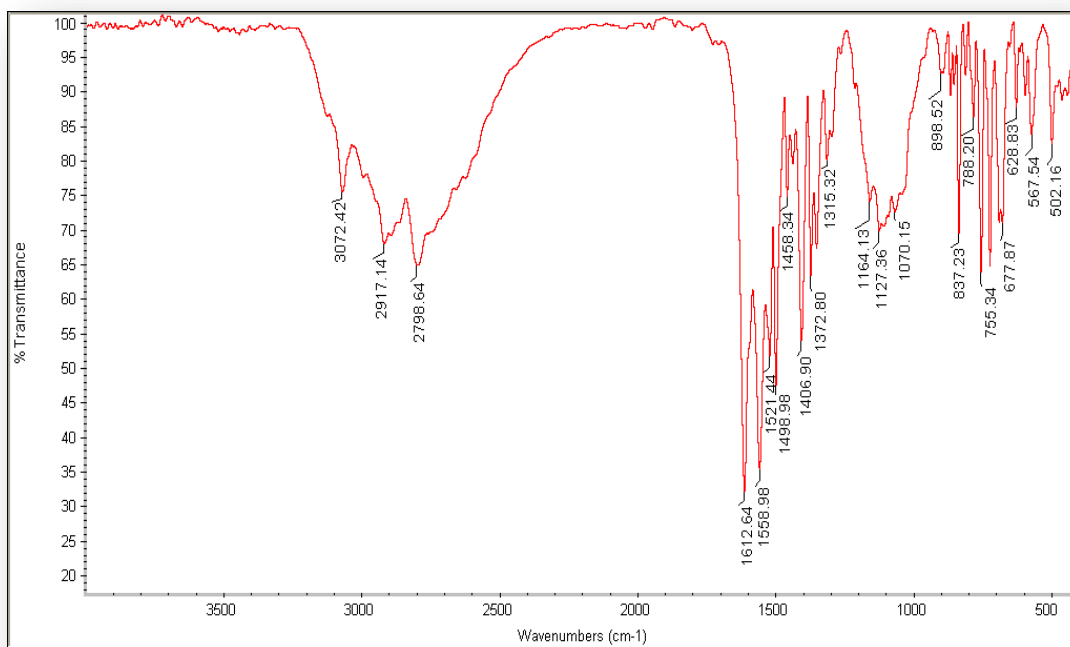

**Figure 16d:** FT-IR (KBr) spectrum of 4,4'-((2-Nitrophenyl)methylene)bis(3-methyl-1-phenyl-1H-pyrazol-5-ol).

**4,4'-(Naphthalen-1-ylmethylene)bis(3-methyl-1-phenyl-1H-pyrazol-5-ol) (3q)**

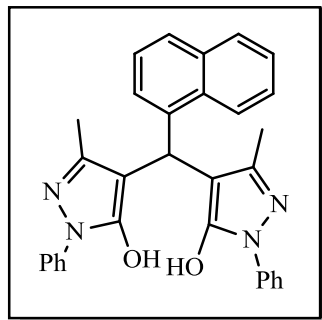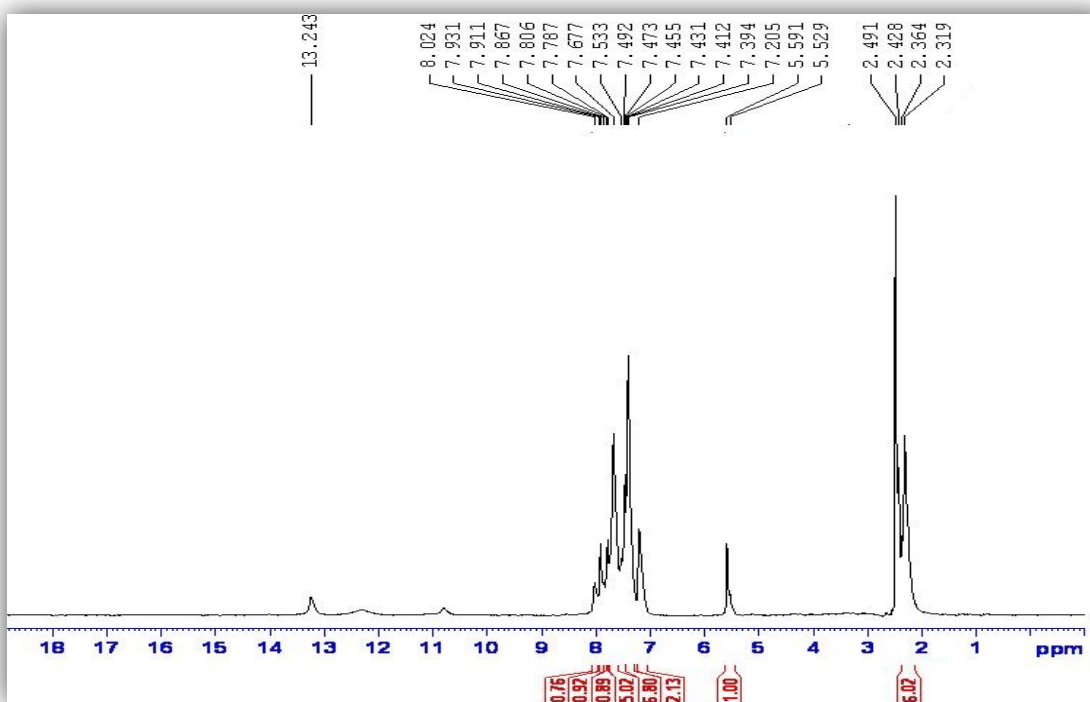

**Figure 17a:**  $^1\text{H}$  NMR (400 MHz,  $\text{DMSO-}d_6$ ) of 4,4'-(Naphthalen-1-ylmethylene)bis(3-methyl-1-phenyl-1H-pyrazol-5-ol)

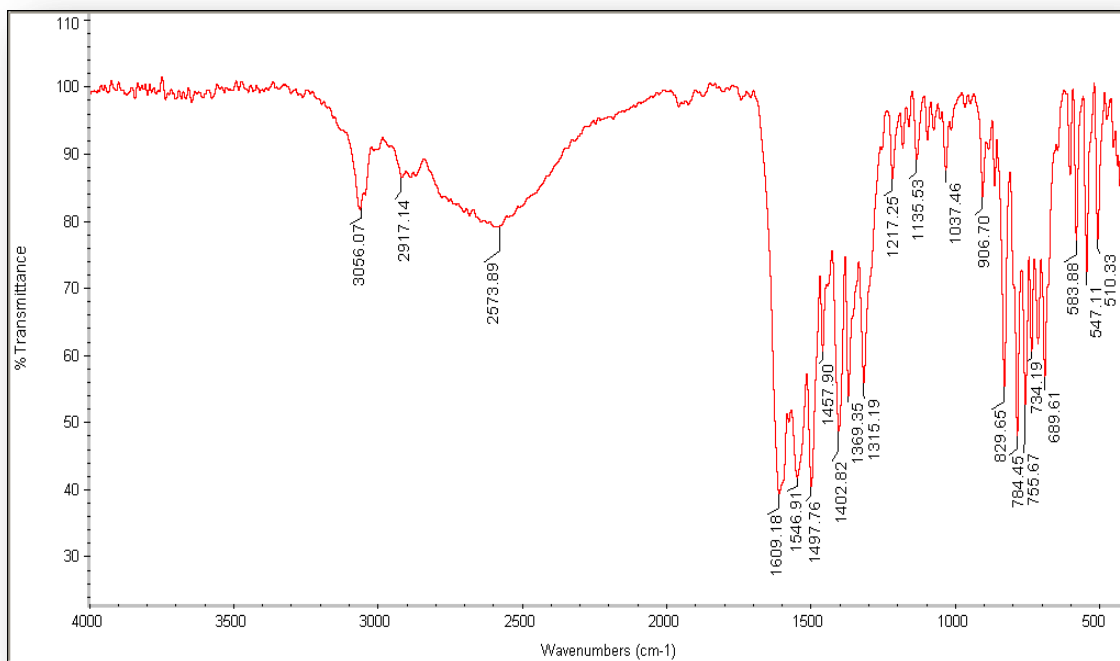

**Figure 17b:** FT-IR (KBr) spectrum of 4,4'-(Naphthalen-1-ylmethylene)bis(3-methyl-1-phenyl-1H-pyrazol-5-ol).

**4,4'-(Pyridin-2-ylmethylene)bis(3-methyl-1-phenyl-1H-pyrazol-5-ol) (3r)**

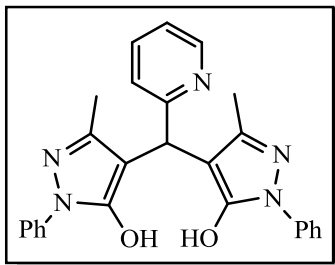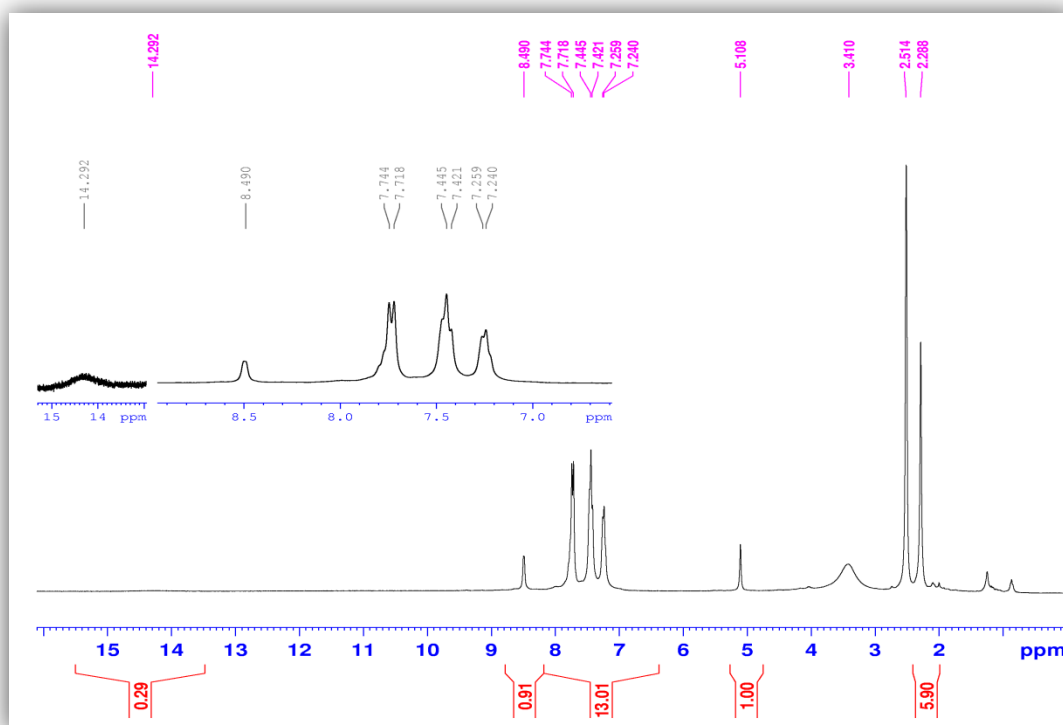

**Figure 18a:**  $^1\text{H}$  NMR (300 MHz,  $\text{DMSO-}d_6$ ) of 4,4'-(Pyridin-2-ylmethylene)bis(3-methyl-1-phenyl-1H-pyrazol-5-ol)



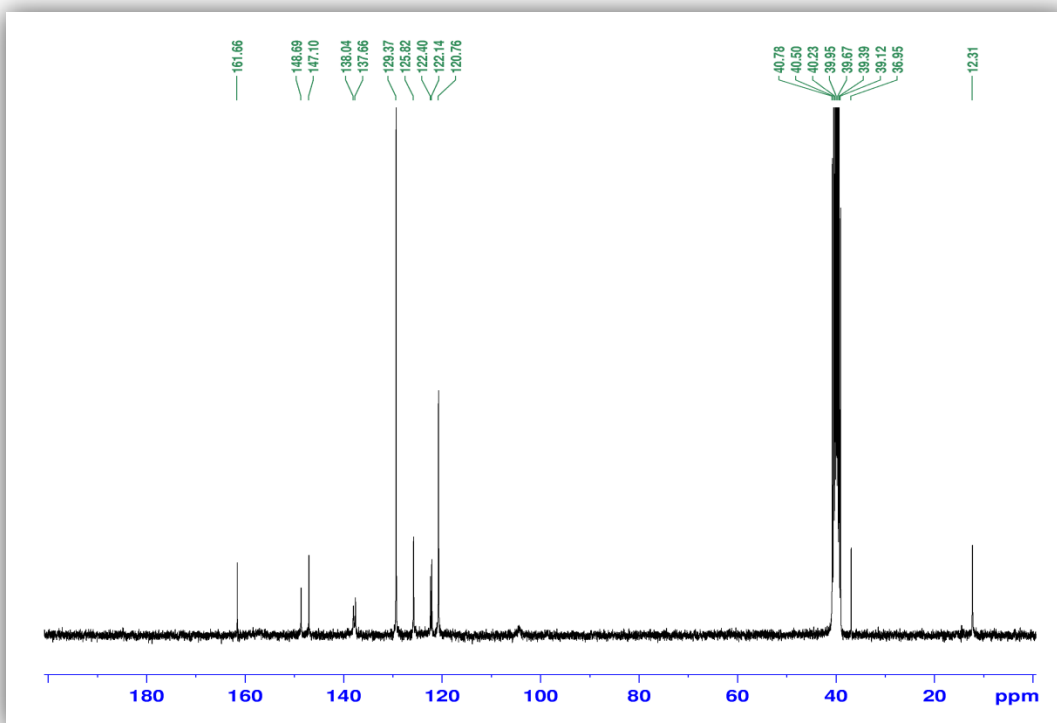

**Figure 18b:**  $^{13}\text{C}$  NMR (75 MHz,  $\text{DMSO-}d_6$ ) of 4,4'-(Pyridin-2-ylmethylene)bis(3-methyl-1-phenyl-1*H*-pyrazol-5-ol)

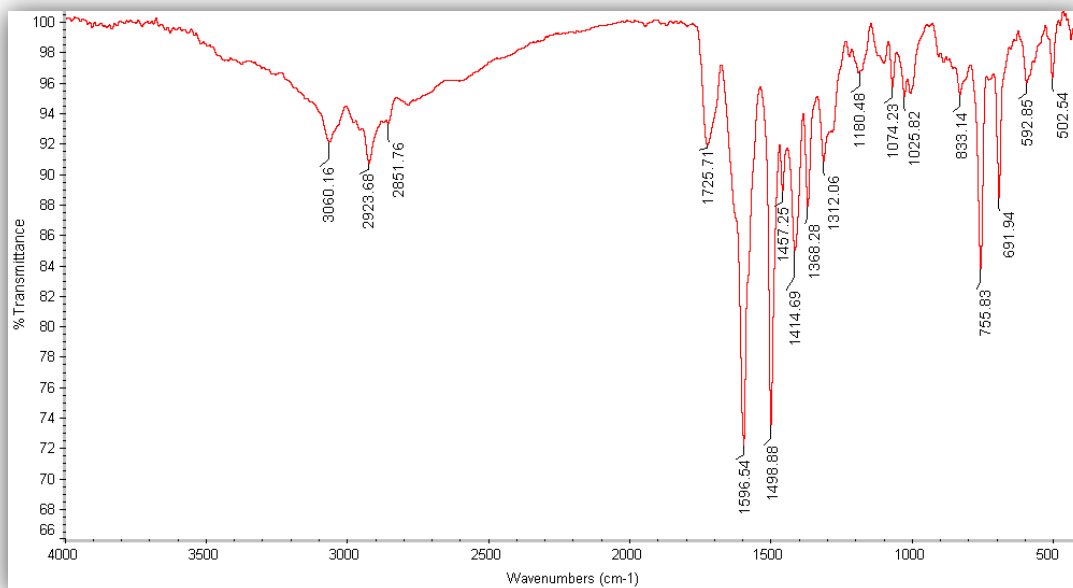

**Figure 18c:** FT-IR (KBr) spectrum of 4,4'-(Pyridin-2-ylmethylene)bis(3-methyl-1-phenyl-1*H*-pyrazol-5-ol)

4,4'-(Pyridin-3-ylmethylene)bis(3-methyl-1-phenyl-1H-pyrazol-5-ol) (3s)

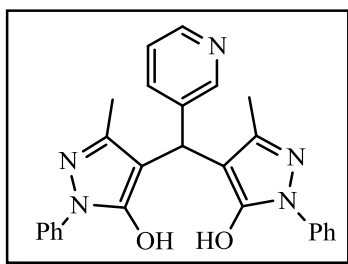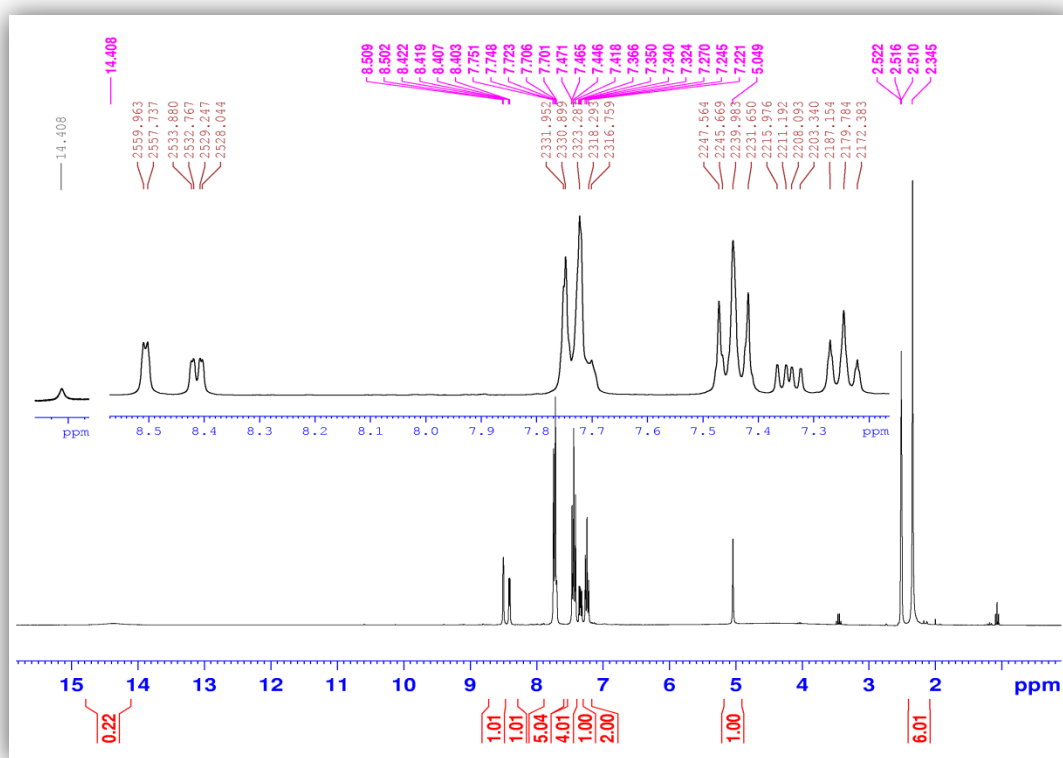

Figure 19a:  $^1\text{H}$  NMR (300 MHz,  $\text{DMSO-}d_6$ ) of 4,4'-(Pyridin-3-ylmethylene)bis(3-methyl-1-phenyl-1H-pyrazol-5-ol).

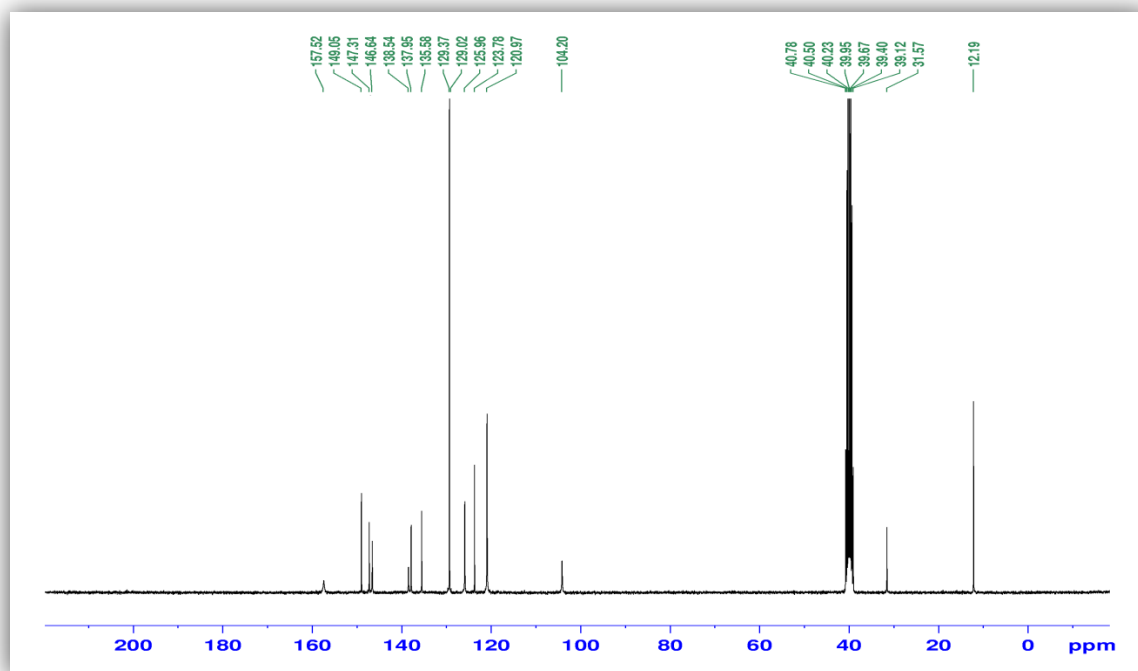

**Figure 19b:**  $^{13}\text{C}$  NMR (75MHz,  $\text{DMSO-}d_6$ ) of 4,4'-(Pyridin-3-ylmethylene)bis(3-methyl-1-phenyl-1H-pyrazol-5-ol).

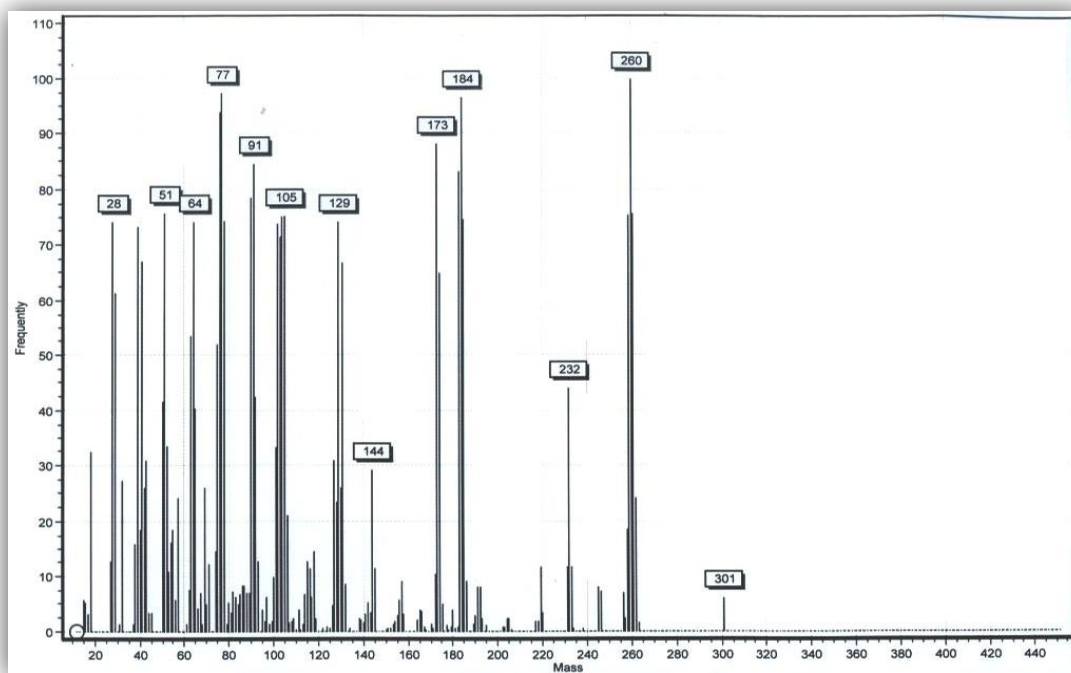

**Figure 19c:** Mass spectrum of 4,4'-(Pyridin-3-ylmethylene)bis(3-methyl-1-phenyl-1H-pyrazol-5-ol)

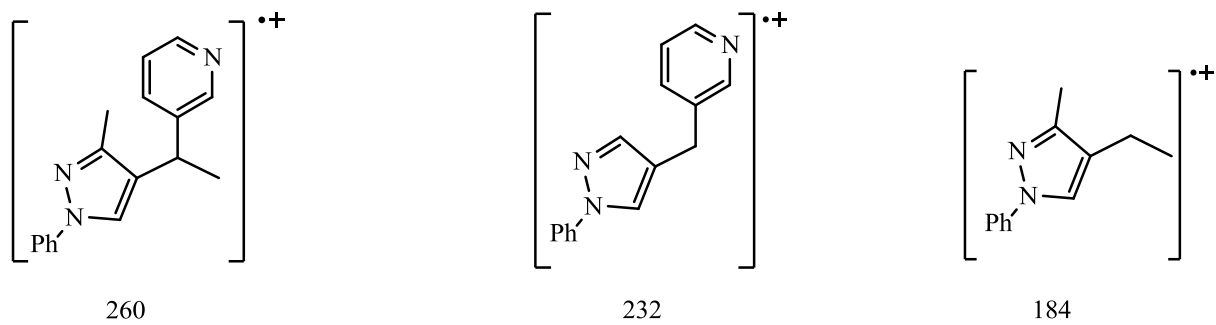

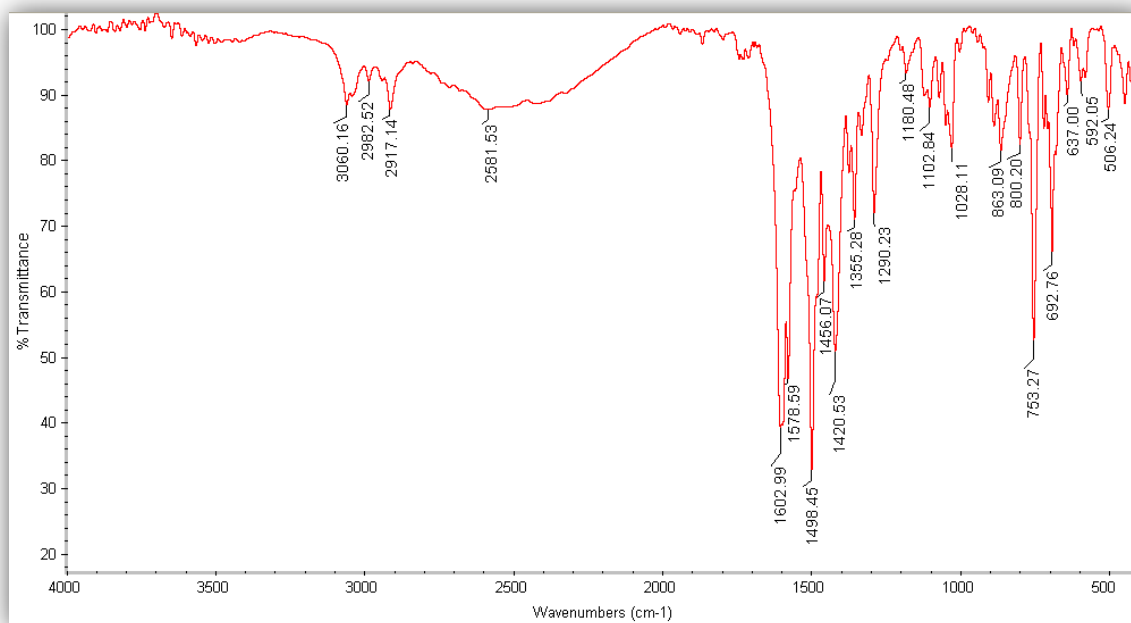

**Figure 19d:** FT-IR (KBr) spectrum of 4,4'-(Pyridin-3-ylmethylene)bis(3-methyl-1-phenyl-1*H*-pyrazol-5-ol).

**(E)-4,4'-(3-Phenylprop-2-ene-1,1-diyl)bis(3-methyl-1-phenyl-1H-pyrazol-5-ol) (3t)**

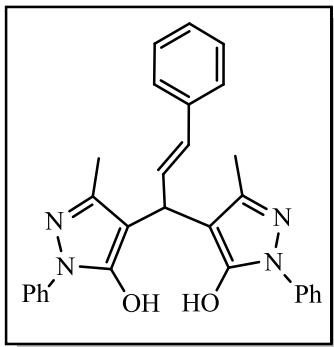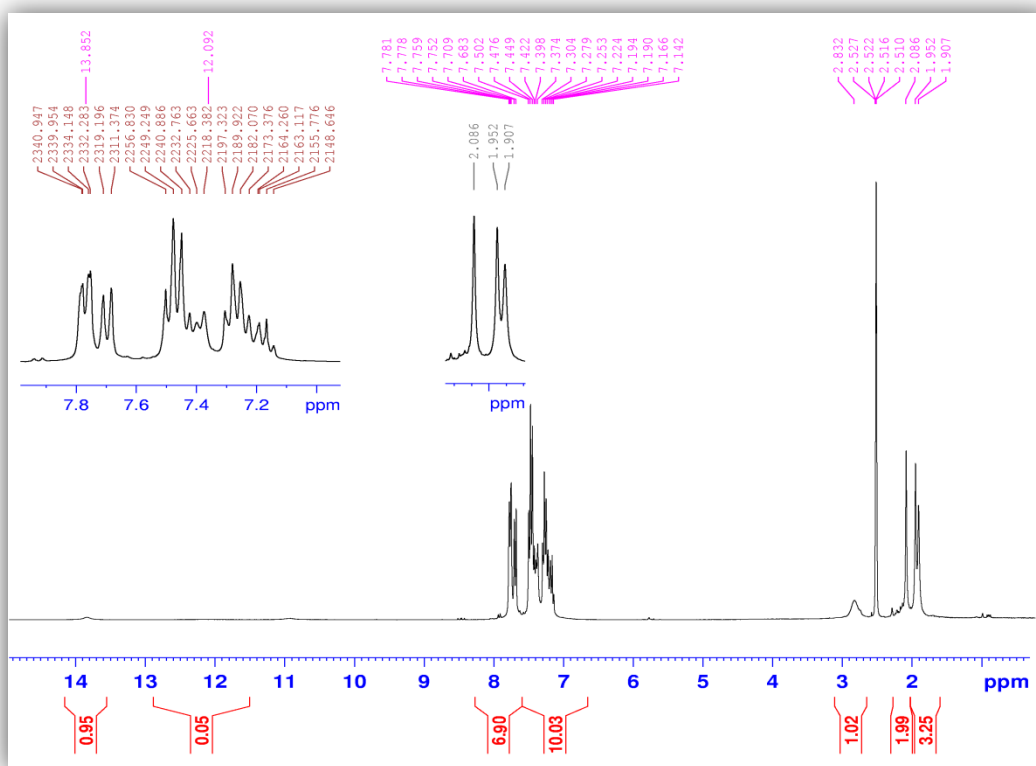

**Figure 20a:**  $^1\text{H}$  NMR (300 MHz,  $\text{DMSO-}d_6$ ) of (E)-4,4'-(3-Phenylprop-2-ene-1,1-diyl)bis(3-methyl-1-phenyl-1H-pyrazol-5-ol)

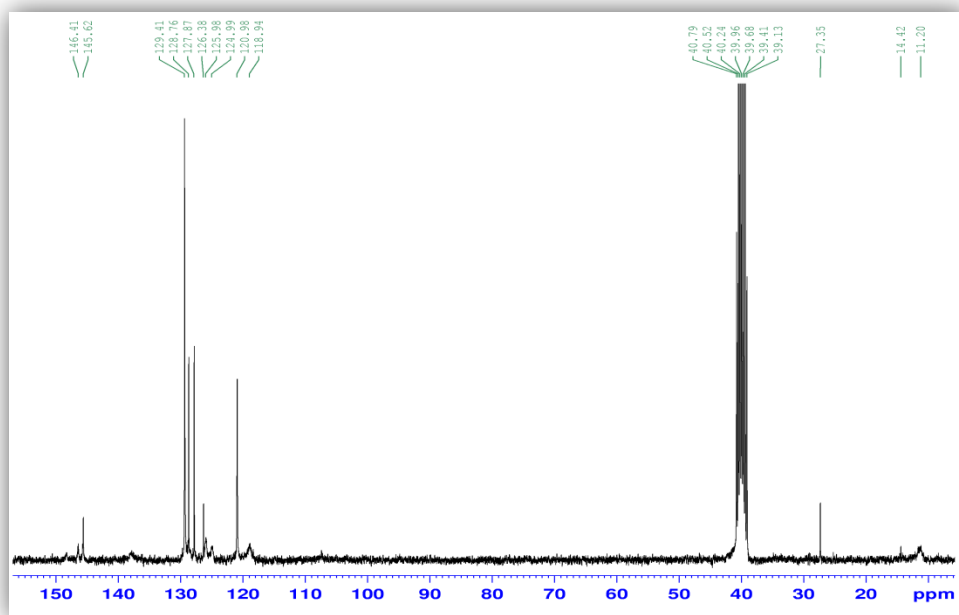

**Figure 20b:**  $^{13}\text{C}$  NMR (75 MHz,  $\text{DMSO-}d_6$ ) of of (*E*)-4,4'-(3-Phenylprop-2-ene-1,1-diyl)bis(3-methyl-1-phenyl-1*H*-pyrazol-5-ol)

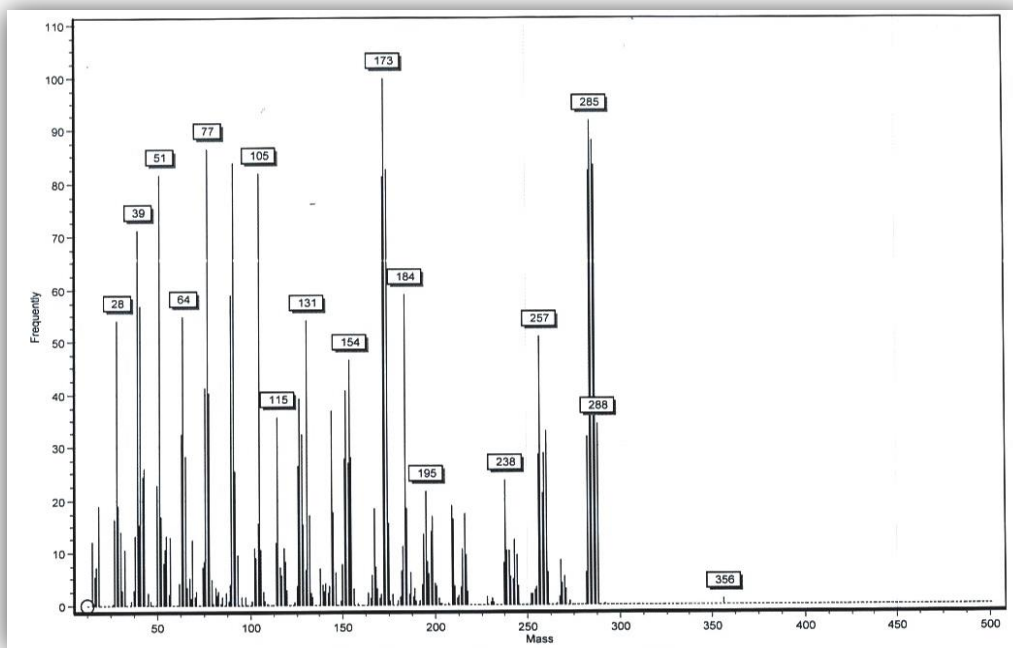

**Figure 20c:** Mass spectrum of (*E*)-4,4'-(3-Phenylprop-2-ene-1,1-diyl)bis(3-methyl-1-phenyl-1*H*-pyrazol-5-ol)

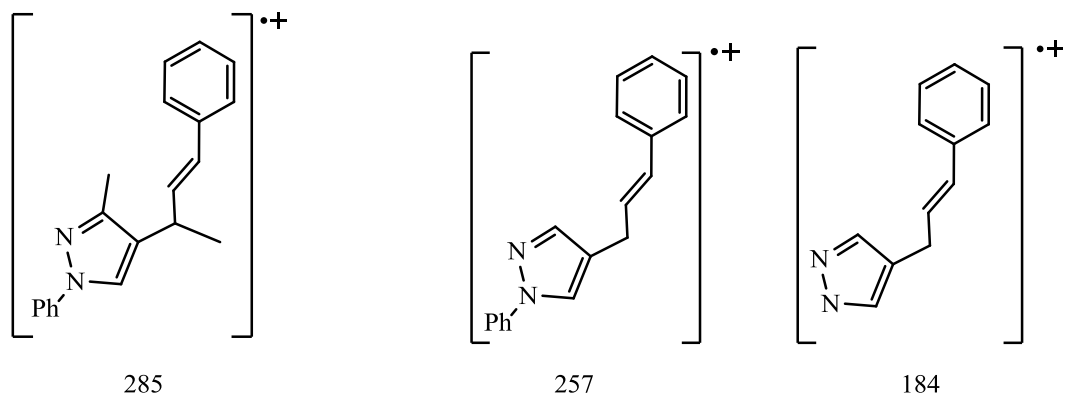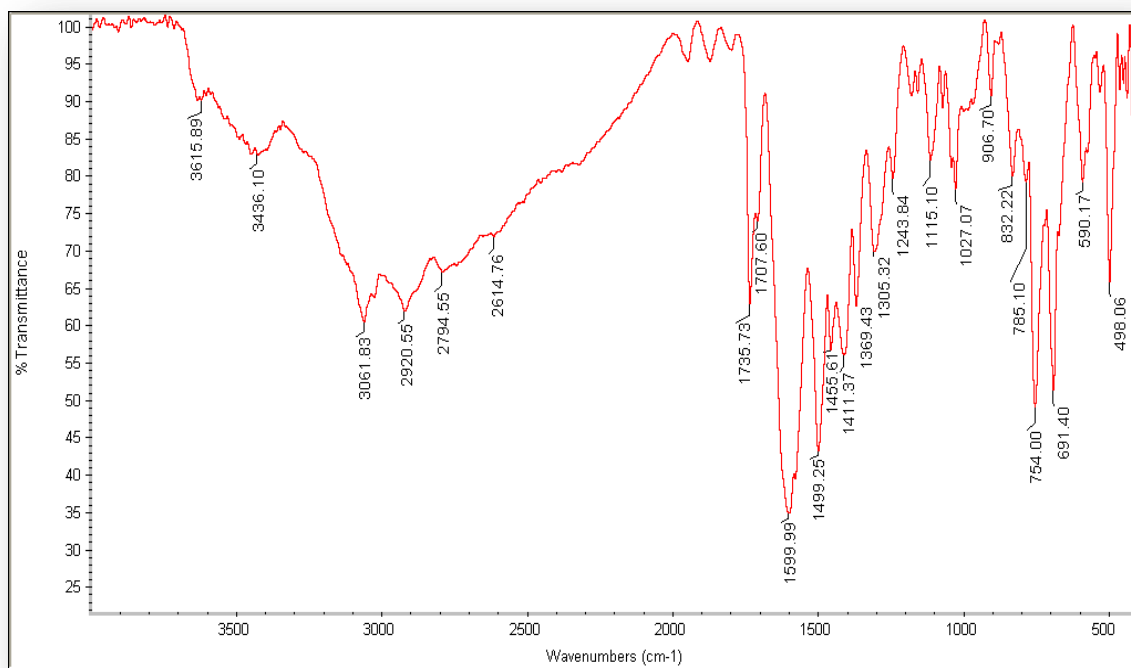

**Figure 20d:** FT-IR (KBr) spectrum of (*E*)-4,4'-(3-Phenylprop-2-ene-1,1-diyl)bis(3-methyl-1-phenyl-1*H*-pyrazol-5-ol).



**4,4'-(Phenylmethylene)bis(3-methyl-1H-pyrazol-5-ol) (3u)**

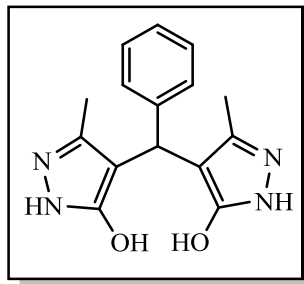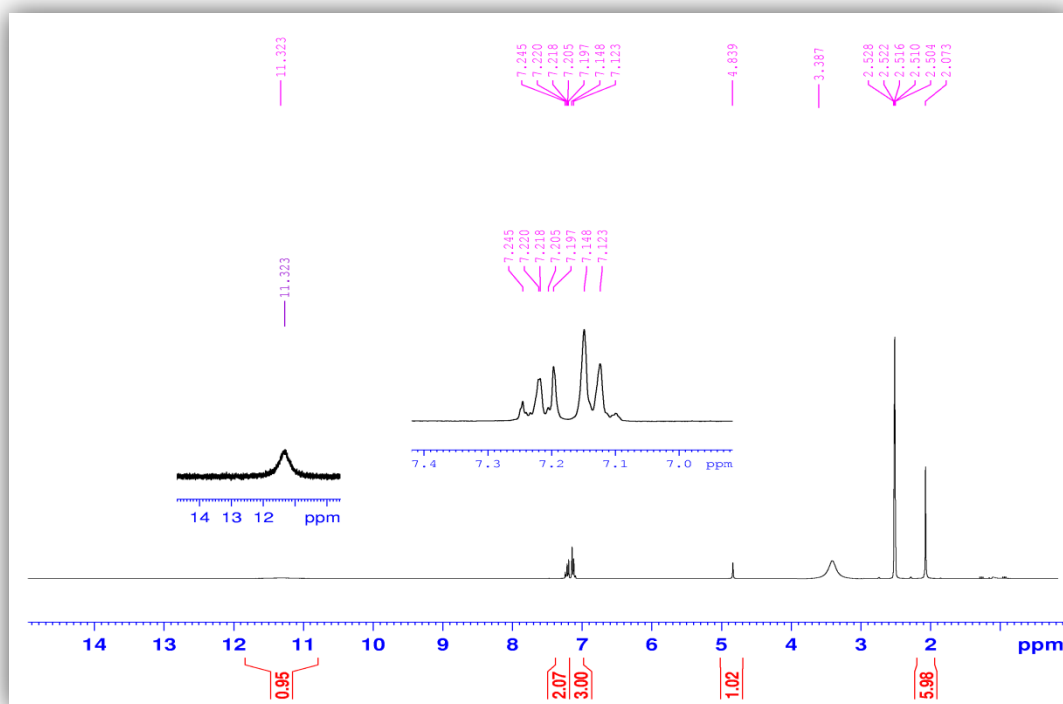

**Figure 21a:** <sup>1</sup>H NMR (300 MHz, DMSO-*d*<sub>6</sub>) of 4,4'-(Phenylmethylene)bis(3-methyl-1H-pyrazol-5-ol).

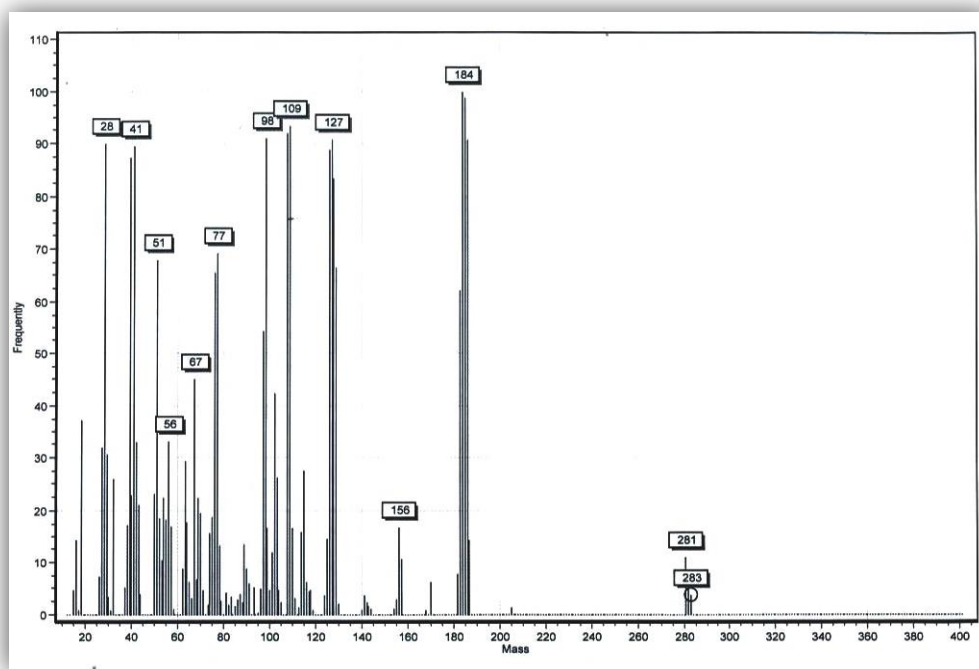

**Figure 21b:** Mass spectrum of 4,4'-(Phenylmethylene)bis(3-methyl-1*H*-pyrazol-5-ol).

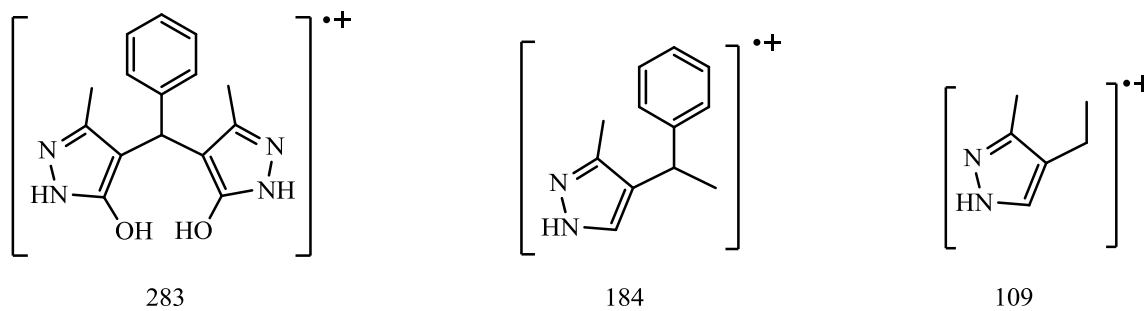

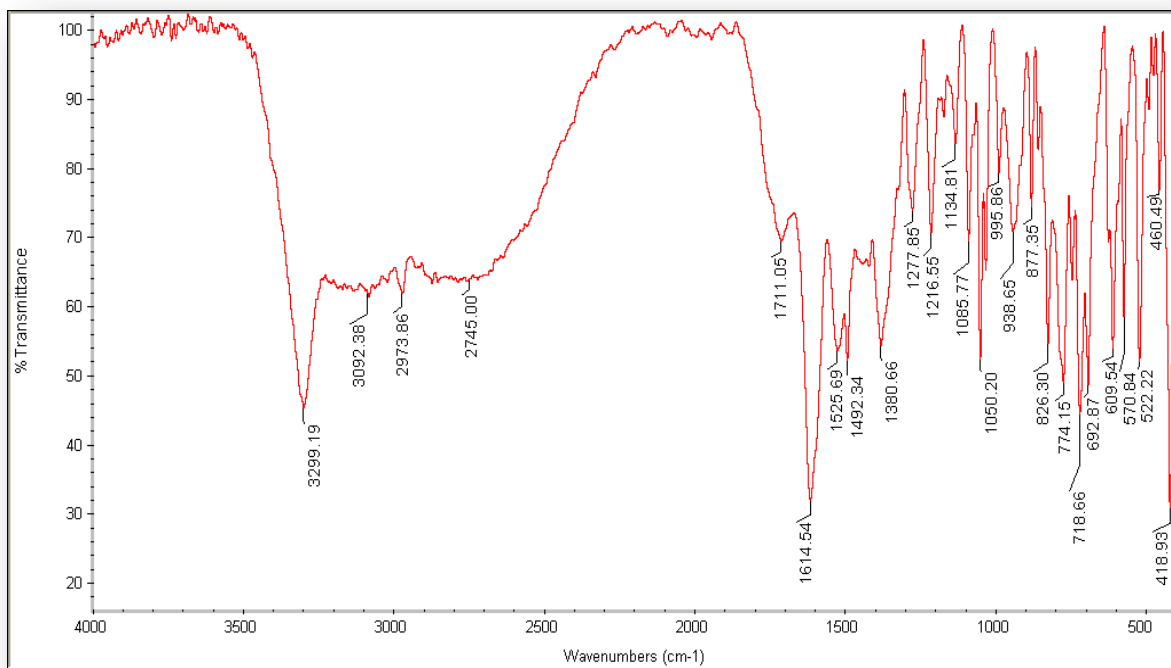

**Figure 21c:** FT-IR (KBr) spectrum of 4,4'-(Phenylmethylene)bis(3-methyl-1H-pyrazol-5-ol).



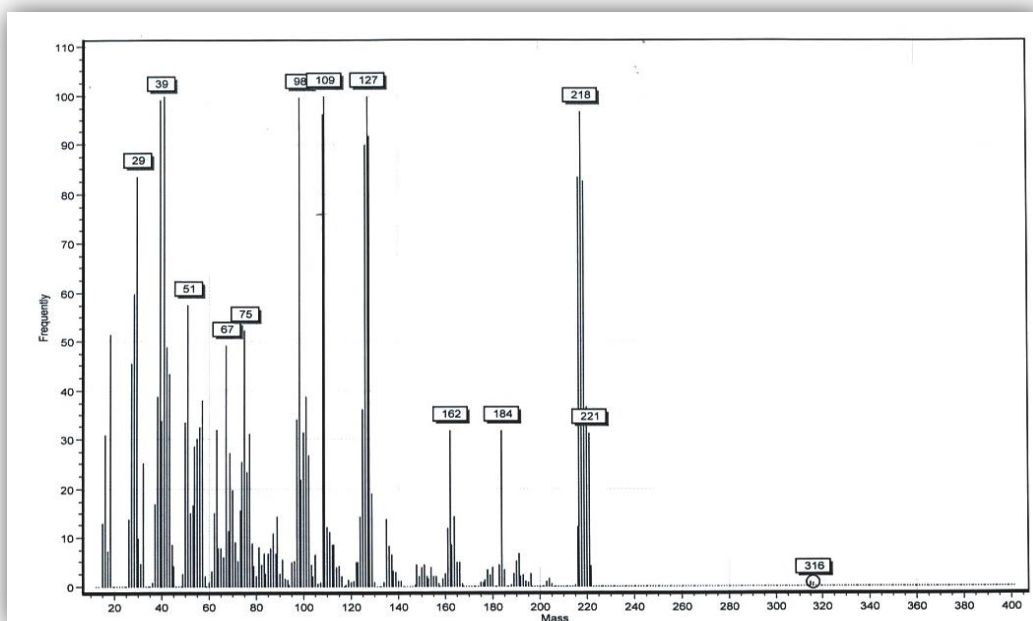

**Figure 22b:** Mass spectrum of 4,4'-((4-Chlorophenyl)methylene)bis(3-methyl-1*H*-pyrazol-5-ol).

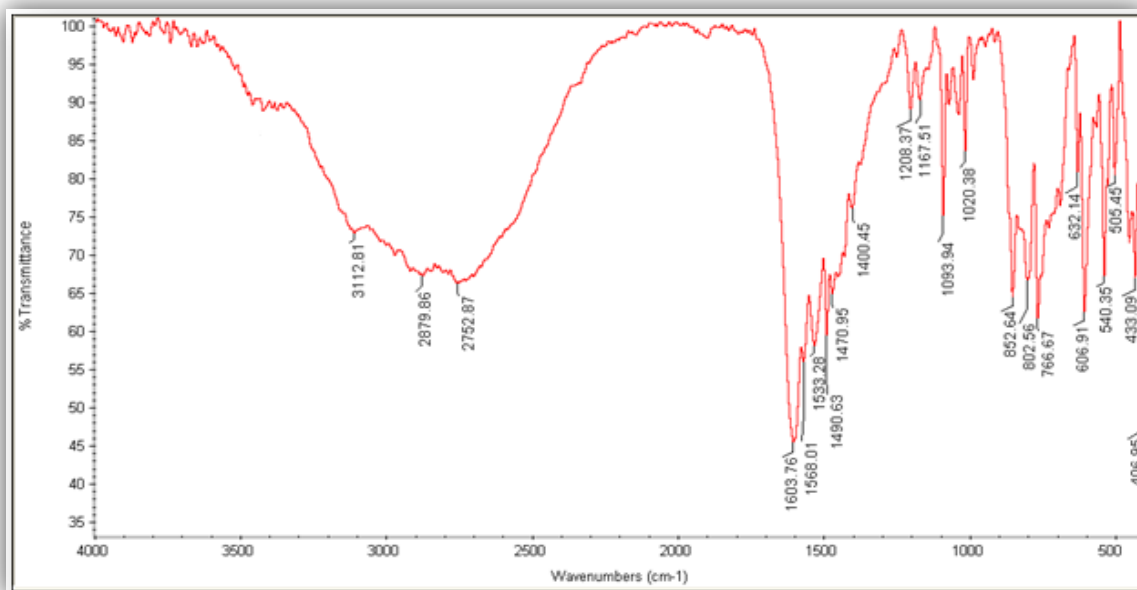

**Figure 22c:** FT-IR (KBr) spectrum of 4,4'-((4-Chlorophenyl)methylene)bis(3-methyl-1*H*-pyrazol-5-ol).

**4,4'-(*p*-Tolylmethylene)bis(3-methyl-1*H*-pyrazol-5-ol) (3w)**

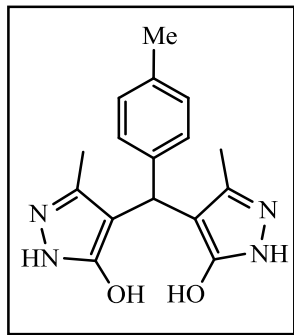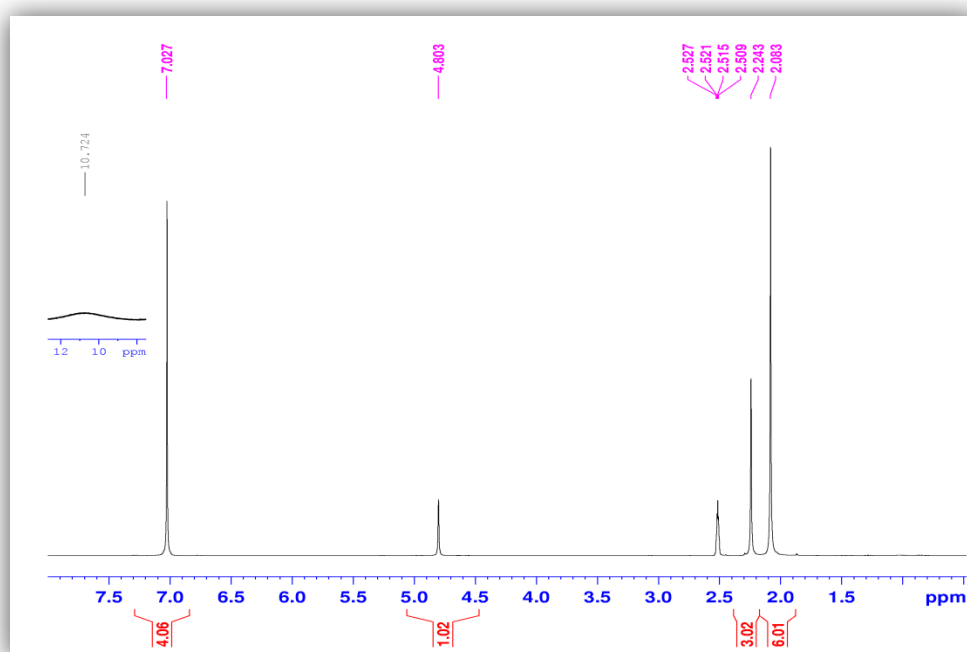

**Figure 23a:**  $^1\text{H}$  NMR (300 MHz,  $\text{DMSO-}d_6$ ) of 4,4'-(*p*-Tolylmethylene)bis(3-methyl-1*H*-pyrazol-5-ol).

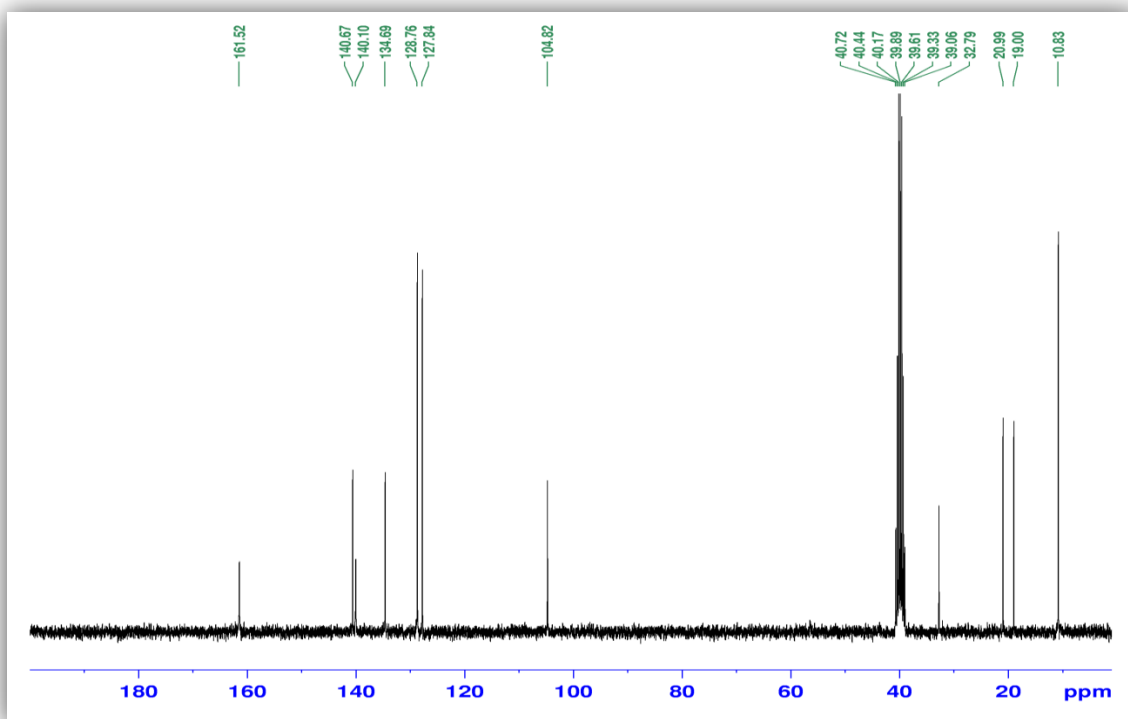

**Figure 23b:**  $^{13}\text{C}$  NMR (75 MHz,  $\text{DMSO-}d_6$ ) of 4,4'-(*p*-Tolylmethylene)bis(3-methyl-1*H*-pyrazol-5-ol)

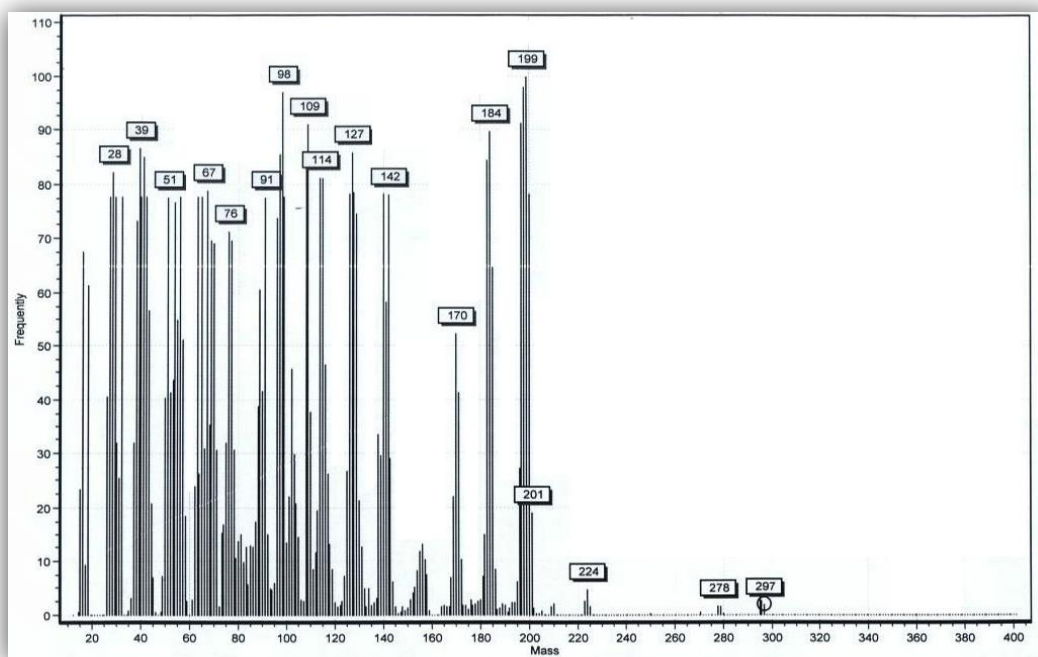

**Figure 23c:** Mass spectrum of 4,4'-(*p*-Tolylmethylene)bis(3-methyl-1*H*-pyrazol-5-ol).

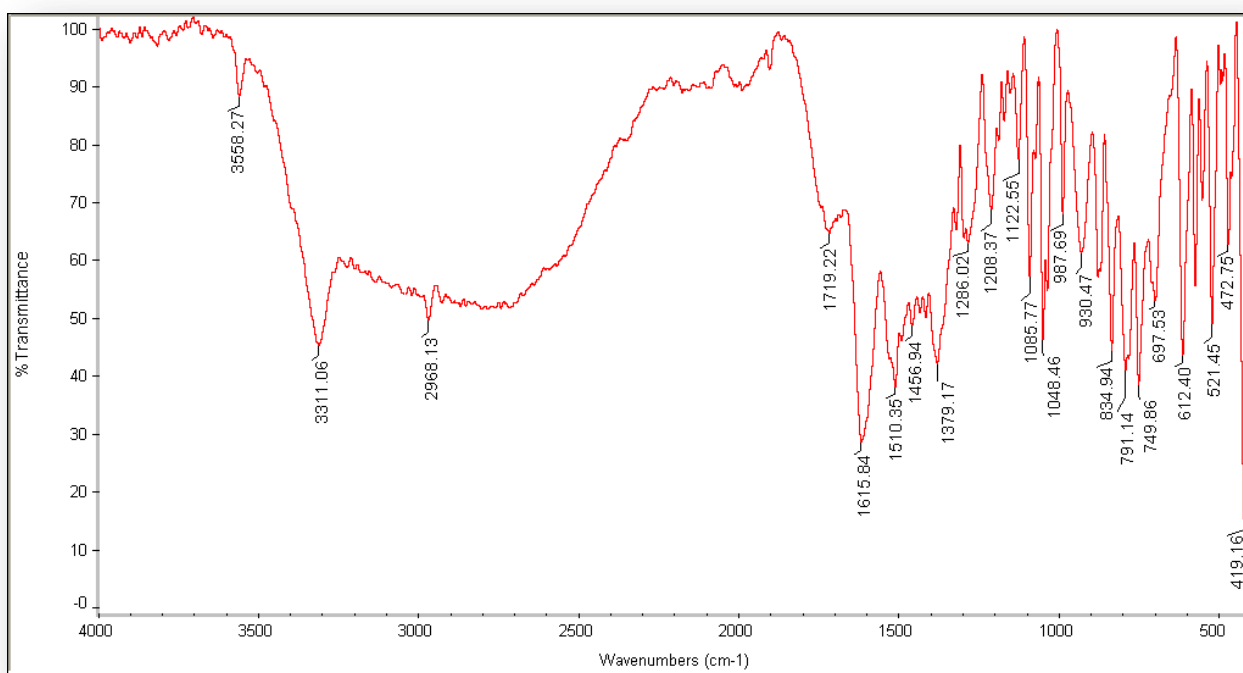

**Figure 23 d:** FT-IR (KBr) spectrum of 4,4'-(*p*-Tolylmethylene)bis(3-methyl-1*H*-pyrazol-5-ol).



**(E)-4-(4-(Dimethylamino)benzylidene)-3-methyl-1-phenyl-1H-pyrazol-5(4H)-one**

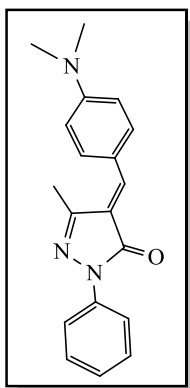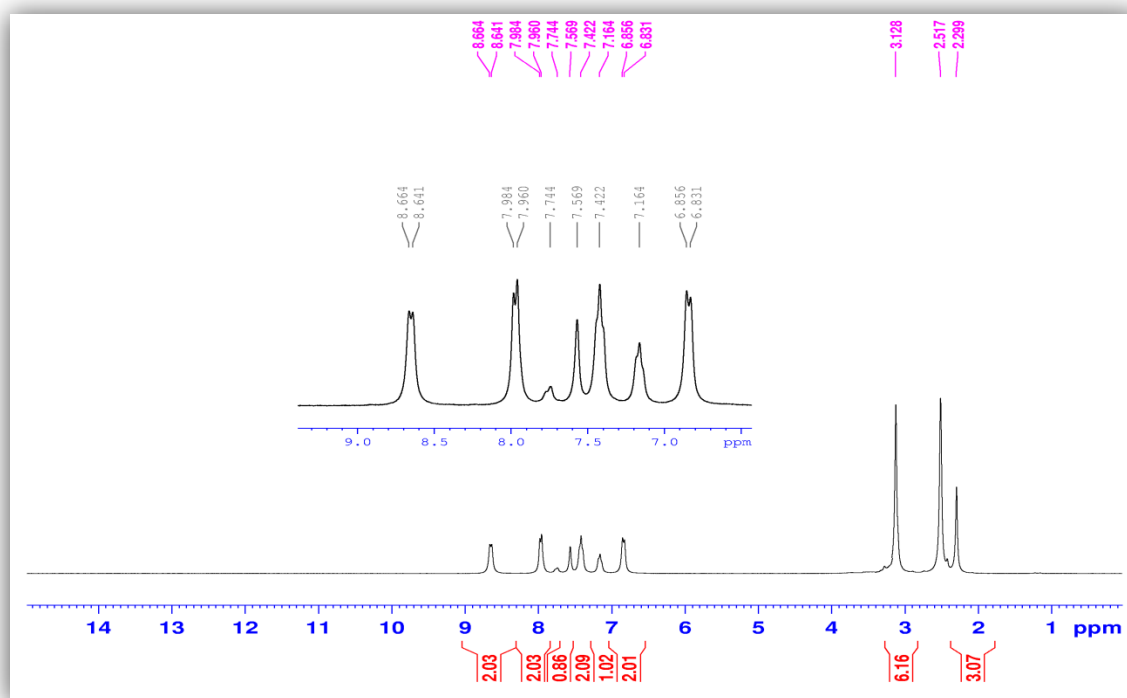

**Figure 24a:**  $^1\text{H}$  NMR (300 MHz,  $\text{DMSO}-d_6$ ) of (E)-4-(4-(Dimethylamino)benzylidene)-3-methyl-1-phenyl-1H-pyrazol-5(4H)-one.

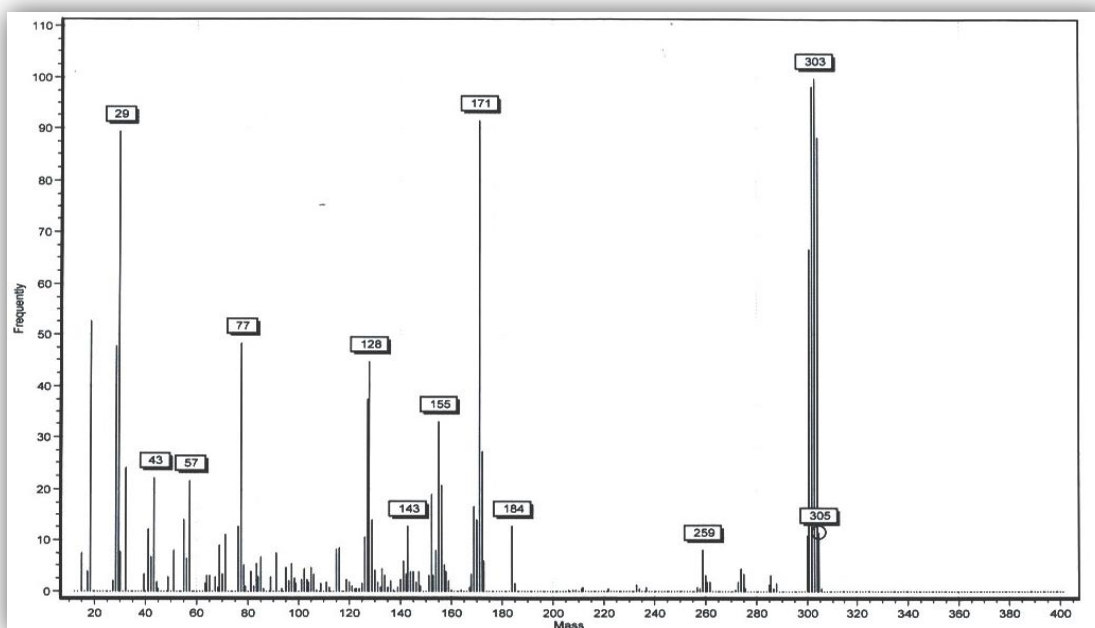

**Figure 24b:** Mass spectrum of *(E)*-4-(4-(Dimethylamino)benzylidene)-3-methyl-1-phenyl-1*H*-pyrazol-5(4*H*)-one.

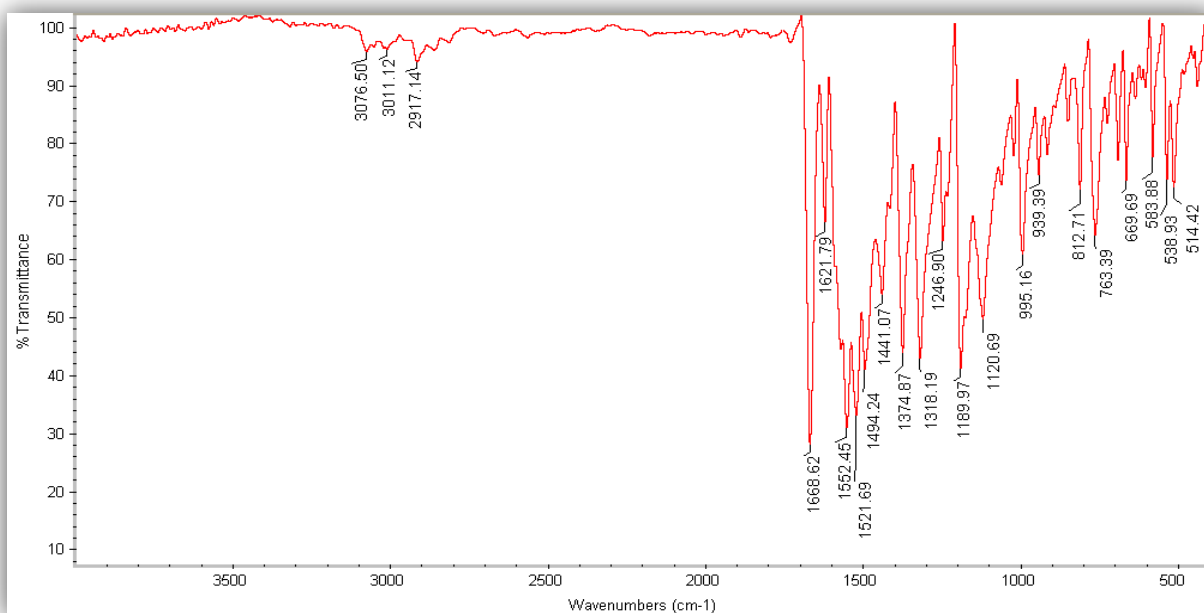

**Figure 24c:** FT-IR (KBr) spectrum of *(E)*-4-(4-(Dimethylamino)benzylidene)-3-methyl-1-phenyl-1*H*-pyrazol-5(4*H*)-one.
